# Supplementary material
Source: PubMed Central journal article supplement (PMC2635921)
Supplement: NIHMS89481-supplement-1_si_001.pdf [file NIHMS89481-supplement-1_si_001.pdf]

# Diels–Alder *Exo*-Selectivity in Terminal-Substituted Dienes and Dienophiles: Experimental Discoveries and Computational Explanations

## Supporting Information

Yu-hong Lam<sup>[a]</sup>, Paul Ha-Yeon Cheong<sup>[b]</sup>, José M. Blasco Mata<sup>[a]</sup>, Steven J. Stanway<sup>[c]</sup>, Véronique Gouverneur<sup>[a]</sup>, K. N. Houk<sup>[b]</sup>

[a] Chemistry Research Laboratory, University of Oxford, Mansfield Road, Oxford OX1 3TA, UK

[b] Department of Chemistry and Biochemistry, University of California, Los Angeles, CA 90095-1569

[c] Neurology and GI Centre of Excellence for Drug Discovery, GlaxoSmithKline, New Frontiers Science, Third Avenue, Harlow, Essex CM19 5AW, UK

### I. Experimental Data ----- 3

#### General Information..... 3

#### A. Synthesis of Starting Materials..... 3

Trimethyl{(2*Z*)-2-[(*E*)-1-methyl-2-phenylvinyl]but-2-en-1-yl}silane, **1c** ----- 4

#### B. Synthesis of Diels–Alder Adducts..... 5

(4*R*)-4-Benzyl-3-({(1*S*,2*S*,5*S*,6*R*)-5,6-dimethyl-2-phenyl-4-[(trimethylsilyl)methyl]cyclohex-3-en-1-yl}carbonyl)-1,3-oxazolidin-2-one, *exo*-**8** ----- 5

(4*R*)-4-Benzyl-3-({(1*S*,2*S*,5*S*,6*R*)-3,5,6-trimethyl-2-phenyl-4-[(trimethylsilyl)methyl]cyclohex-3-en-1-yl}carbonyl)-1,3-oxazolidin-2-one, *exo*-**9** ----- 6

*rac*-3-({(1*R*,2*S*,5*R*)-5-Methyl-4-oxo-2-phenylcyclohexyl}carbonyl)-1,3-oxazolidin-2-one, *endo*-**10** ----- 7

*rac*-3-({(1*R*,2*R*,5*R*,6*S*)-5,6-Dimethyl-2-phenyl-4-[(trimethylsilyl)oxy]cyclohex-3-en-1-yl}carbonyl)-1,3-oxazolidin-2-one, *exo*-**11** ----- 8

*rac*-3-({(1*R*,2*R*,5*R*,6*S*)-5,6-Dimethyl-2-phenyl-4-[(triisopropylsilyl)oxy]cyclohex-3-en-1-yl}carbonyl)-1,3-oxazolidin-2-one, *exo*-**12** ----- 9

*rac*-3-({(1*R*,2*S*,5*S*,6*R*)-2,5,6-Trimethyl-4-[(trimethylsilyl)oxy]cyclohex-3-en-1-yl}carbonyl)-1,3-oxazolidin-2-one, *exo*-**13** ----- 10

(4*R*)-4-Benzyl-3-({(1*R*,2*S*,5*S*,6*R*)-2,5,6-trimethyl-4-[(triisopropylsilyl)oxy]cyclohex-3-en-1-yl}carbonyl)-1,3-oxazolidin-2-one, *exo*-**14** ----- 10

1-(6-Methyl-2-phenyl-4-((trimethylsilyl)methyl)cyclohex-3-enyl)ethanone – [*rac*-(1*R*,2*S*,6*S*): *endo*-**15** (major)] [*rac*-(1*R*,2*R*,6*S*): *exo*-**15** (minor)] ----- 11

1-(5-Methyl-2-phenyl-4-((trimethylsilyl)methyl)cyclohex-3-enyl)ethanone – [*rac*-(1*R*,2*S*,5*S*): *endo*-**16**] [*rac*-(1*R*,2*S*,5*R*): *exo*-**16**] ----- 13

1-({5,6-Dimethyl-2-phenyl-4-[(trimethylsilyl)methyl]cyclohex-3-en-1-yl}ethanone – [*rac*-(1*R*,2*R*,5*R*,6*S*): *exo*-**17a** (major)], [*rac*-(1*R*,2*R*,5*S*,6*S*): *exo*-**17b** (minor)] [*rac*-(1*R*,2*S*,5*R*,6*S*): *endo*-**17c** (minor)] [*rac*-(1*R*,2*S*,5*S*,6*S*): *endo*-**17d** (minor)] ----- 14

#### C. NMR Spectra..... 16

|                                           |           |
|-------------------------------------------|-----------|
| Diene <b>1c</b> .....                     | 16        |
| Cycloadduct <i>exo-8</i> .....            | 17        |
| Cycloadduct <i>exo-9</i> .....            | 18        |
| Cycloadduct <i>endo-10</i> .....          | 19        |
| Cycloadduct <i>exo-11</i> .....           | 20        |
| Cycloadduct <i>exo-12</i> .....           | 21        |
| Cycloadduct <i>exo-13</i> .....           | 22        |
| Cycloadduct <i>exo-14</i> .....           | 23        |
| Cycloadduct <i>endo-15</i> .....          | 24        |
| Cycloadduct <i>exo-15</i> .....           | 25        |
| Cycloadduct <i>endo-16</i> .....          | 26        |
| Cycloadduct <i>exo-16</i> .....           | 27        |
| Cycloadducts <i>exo-17a/exo-17b</i> ..... | 28        |
| <b>References (Experimental)</b> .....    | <b>29</b> |

## **II. Computational Data ----- 30**

### **A. Complete ref. 35..... 30**

### **B. Optimized Structure and Energies of Reactants..... 31**

|                                       |    |
|---------------------------------------|----|
| Diene <b>1d</b> .....                 | 31 |
| Diene <b>1e</b> .....                 | 32 |
| Diene <b>2c</b> .....                 | 33 |
| Diene <b>2e</b> .....                 | 34 |
| Diene <b>2f</b> .....                 | 35 |
| Diene <b>18</b> .....                 | 36 |
| Diene <b>19</b> .....                 | 37 |
| Diene <b>20</b> .....                 | 38 |
| Dienophile <b>A<sub>2</sub></b> ..... | 39 |
| Dienophile <b>3</b> .....             | 40 |

### **C. Optimized Structure and Energies of Diels–Alder Transition Structures ..... 41**

|                                        |    |
|----------------------------------------|----|
| <b>2c+A<sub>2</sub>, endo</b> TS ..... | 41 |
| <b>2c+A<sub>2</sub>, exo</b> TS .....  | 42 |
| <b>2e+A<sub>2</sub>, endo</b> TS ..... | 44 |
| <b>2e+A<sub>2</sub>, exo</b> TS .....  | 45 |
| <b>2f+A<sub>2</sub>, endo</b> TS.....  | 47 |
| <b>2f+A<sub>2</sub>, exo</b> TS .....  | 48 |
| <b>2c+3, endo</b> TS .....             | 50 |
| <b>2c+3, exo</b> TS.....               | 51 |
| <b>18+A<sub>2</sub>, endo</b> TS ..... | 53 |
| <b>18+A<sub>2</sub>, exo</b> TS .....  | 54 |
| <b>19+A<sub>2</sub>, endo</b> TS ..... | 55 |
| <b>19+A<sub>2</sub>, exo</b> TS .....  | 56 |
| <b>1d+A<sub>2</sub>, endo</b> TS ..... | 57 |
| <b>1d+A<sub>2</sub>, exo</b> TS .....  | 58 |
| <b>1e+A<sub>2</sub>, endo</b> TS ..... | 60 |
| <b>1e+A<sub>2</sub>, exo</b> TS .....  | 61 |
| <b>20+A<sub>2</sub>, endo</b> TS ..... | 63 |
| <b>20+A<sub>2</sub>, exo</b> TS .....  | 64 |

# I. Experimental Data

## General Information

<sup>1</sup>H NMR spectra were recorded in deuterated chloroform or benzene using a Bruker AV400, DRX500 or AVII500 spectrometer, calibrated using residual undeuterated solvent as the internal reference. <sup>13</sup>C NMR spectra were recorded in deuterated chloroform or benzene using a Bruker AV400, AVII500 with a <sup>13</sup>C cryoprobe, or DRX500 spectrometer. Chemical shifts ( $\delta$ ) are quoted in parts per million (ppm). Coupling constants ( $J$ ) are measured to the nearest 0.5 Hz. The following abbreviations are used to describe multiplicities – s: singlet, d: doublet, t: triplet, q: quartet, m: multiplet, app: apparent. NMR spectra were processed in ACD/SpecManager. High resolution mass spectra (HRMS,  $m/z$ ) were recorded on a Micromass GCT (NH<sub>3</sub>, CI<sup>+</sup>) instrument. Optical rotations were determined on a Perkin Elmer 241 polarimeter in a 1-decimeter cell.  $[\alpha]_D$  values are given in 10<sup>-1</sup> deg cm<sup>2</sup> g<sup>-1</sup>. IR spectra were recorded on a Bruker Tensor 27 FT-IR spectrometer. Absorptions are measured in wavenumbers, and only peaks of interest are reported. IUPAC names were obtained using the ACD/I-lab service.

All reactions were conducted in dried glassware under an inert atmosphere of argon or nitrogen. Solvents were dried on an alumina column before use. All reactions were monitored by TLC using Merck Kieselgel 60 F<sub>254</sub> plates. Visualization of the reaction components was achieved using UV fluorescence (254 nm), and KMnO<sub>4</sub> or ceric ammonium molybdate stain. Flash column chromatography was carried out over Merck silica gel C60 (40–60  $\mu$ m).

## A. Synthesis of Starting Materials

The following dienes and dienophiles were prepared by reported procedures: trimethyl[(3*E*)-2-methylene-4-phenylbut-3-en-1-yl]silane (**1a**),<sup>1</sup> trimethyl{(2*Z*)-2-[(*E*)-2-phenylvinyl]but-2-en-1-yl}silane (**1b**),<sup>2</sup> trimethyl({(1*Z*)-1-[(*E*)-2-phenylvinyl]prop-1-en-1-yl}oxy)silane (**2a**),<sup>2</sup> triisopropyl({(1*Z*)-1-[(*E*)-2-phenylvinyl]prop-1-en-1-yl}oxy)silane (**2b**),<sup>3</sup> {[ (1*Z*,2*E*)-1-ethylidenebut-2-

en-1-yl]oxy}(trimethyl)silane (**2c**),<sup>4</sup> {[[(1Z,2E)-1-ethylidenebut-2-en-1-yl]oxy}(triisopropyl)silane (**2d**),<sup>5</sup> (4R)-4-benzyl-3-[(2E)-but-2-enoyl]-1,3-oxazolidin-2-one (**3\***),<sup>6</sup> 3-[(2E)-but-2-enoyl]-1,3-oxazolidin-2-one (**3**),<sup>7</sup> and 3-acryloyl-1,3-oxazolidin-2-one (**4**).<sup>8</sup>

Trimethyl{(2Z)-2-[(E)-1-methyl-2-phenylvinyl]but-2-en-1-yl}silane, **1c**

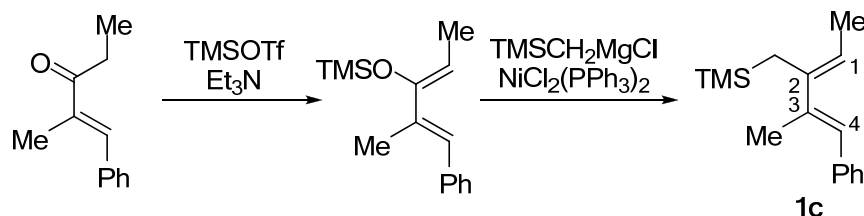

To a solution of (1E)-2-methyl-1-phenylpent-1-en-3-one<sup>9</sup> (28.8 mmol, 5.030 g) in THF (72 mL) at 0 °C was added Et<sub>3</sub>N (74.9 mmol, 10.4 mL), followed by dropwise addition of TMSOTf (31.4 mmol, 5.6 mL). After the reaction was stirred at 0 °C for 2 h, 40 mL of a pH 7 buffer solution and 80 mL of Et<sub>2</sub>O were added. The mixture was allowed to warm to room temperature. The organic phase was washed with the buffer solution (3 × 40 mL), and the combined aqueous layers were extracted with Et<sub>2</sub>O (80 mL). The combined organic layers were dried over sodium sulfate, filtered, and evaporated under reduced pressure to yield the silyl enol ether as a pale yellow oil (6.550 g, 92%), which was committed to the next step without purification.

A freshly prepared solution of (trimethylsilyl)methylmagnesium chloride<sup>10</sup> (66.5 mmol, 1 M solution in Et<sub>2</sub>O) was added to bis(triphenylphosphine)nickel(II) dichloride (880 μmol, 574 mg) in a round-bottomed flask. The solvent was then removed under reduced pressure. To the residue was added the silyl enol ether prepared as above (26.6 mmol, 6.550 g) in toluene (70 mL). The solution was heated to 90 °C for 16 h. The reaction was cooled by an ice-water bath and quenched by cautious addition of saturated aqueous NH<sub>4</sub>Cl (80 mL). The mixture was then poured into Et<sub>2</sub>O (80 mL) in a separation funnel and the phases separated. The organic phase was further washed with saturated aqueous NH<sub>4</sub>Cl (2 × 40 mL) and brine (40 mL). The combined organic phase was dried, filtered through Celite<sup>®</sup> and evaporated *in vacuo* to yield the crude product, which was purified by column chromatography (hexane/Et<sub>3</sub>N 96:4) to afford **1c** as an oil (2.516 g, 38%, (Z,E)/(E,E) = 5:1 by <sup>1</sup>H NMR).

$R_f$  (hexane/diethyl ether, 9:1): 0.67. Major isomer, (Z,E)-1c.  $^1\text{H NMR}$  ( $\text{CDCl}_3$ , 400 MHz),  $\delta$ : 7.36–7.19 (m, 5H, Ph); 6.53 (s, 1H, H4); 5.69 (q, 1H,  $J$  7.0, H1); 1.99 (s, 3H,  $\text{Me}^3$ ); 1.90 (s, 2H,  $\text{CH}_2\text{SiMe}_3$ ); 1.73 (d, 3H,  $J$  7.0,  $\text{Me}^1$ ); 0.05 (s, 9H,  $\text{SiMe}_3$ ).  $^{13}\text{C NMR}$  ( $\text{CDCl}_3$ , 101 MHz)  $\delta$ : 140.5, 139.3, 139.1 (C2, C3, *ipso*-Ph); 129.2, 128.0, 125.9, 125.5 (Ph, C4); 118.8 (C1); 18.0 ( $\text{CH}_2\text{SiMe}_3$ ); 16.2 ( $\text{Me}^3$ ); 14.8 ( $\text{Me}^1$ ); -0.6 ( $\text{SiMe}_3$ ); **IR** ( $\nu$ ,  $\text{cm}^{-1}$ ): 2955, 1708, 1448, 1249, 850; **HRMS**: required for  $\text{C}_{16}\text{H}_{25}\text{Si}$  ( $[M+H]^+$ ) 245.1726, found 245.1722.

## B. Synthesis of Diels–Alder Adducts

The characterization data of *endo*-7 has been reported previously.<sup>2</sup>

(4*R*)-4-Benzyl-3-(((1*S*,2*S*,5*S*,6*R*)-5,6-dimethyl-2-phenyl-4-((trimethylsilyl)methyl)cyclohex-3-en-1-yl)carbonyl)-1,3-oxazolidin-2-one, *exo*-8

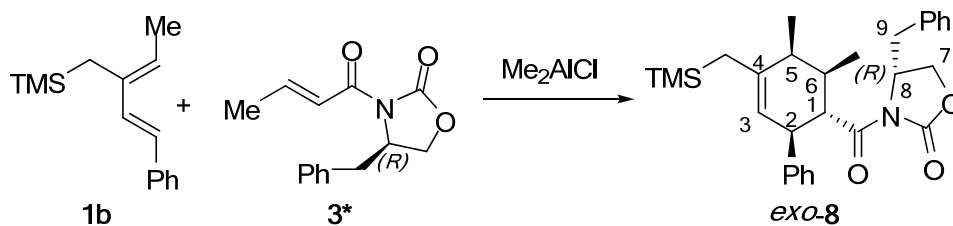

At  $-40\text{ }^\circ\text{C}$ , dimethylaluminum chloride (3.0 mmol, 3.0 mL of a 1 *M* solution in hexanes) was added to a solution of **3\*** (2.2 mmol, 532 mg) in  $\text{CH}_2\text{Cl}_2$  (20 mL). Silylated diene **1b** (2.2 mmol, 500 mg of a 3:1 (*Z,E*)/(*E,E*) mixture) was added dropwise. The reaction was stirred at  $-40\text{ }^\circ\text{C}$  for 4 h, before being quenched by saturated aqueous  $\text{NH}_4\text{Cl}$  (10 mL) at  $0\text{ }^\circ\text{C}$ . The phases were separated, and the aqueous phase was extracted with  $\text{Et}_2\text{O}$  ( $2 \times 20\text{ mL}$ ). The combined organic phases were dried, filtered and the solvent evaporated to give a crude white solid, which was purified by column chromatography (hexane/diethyl ether, 4:1) to yield *exo*-8 as a white solid (58%, 601 mg). Crystals suitable for X-ray crystallography were grown by slow evaporation of  $\text{EtOAc}$  subsequent to chromatographic purification.

**mp**: 140–141  $^\circ\text{C}$ .  $R_f$  (hexane/diethyl ether, 4:1): 0.24.  $^1\text{H NMR}$  ( $\text{CDCl}_3$ , 400 MHz)  $\delta$ : 7.30–7.19 (m, 8H, Ph); 6.92–6.87 (m, 2H, Ph); 5.12 (d, 1H,  $J$  1.0, H3); 4.67 (tt, 1H,  $J$  9.0, 3.0, H8); 4.40 (t, 1H,  $J$  11.0, H1); 4.03 (t, 1H,  $J$  8.5, H7); 3.93 (dd, 1H,  $J$  9.0, 3.0, H7'); 3.87 (d, 1H,  $J$  11.0, H2); 2.94 (dd, 1H,  $J$  13.5,

3.0, H9); 2.29–2.23 (m, 1H, H6); 2.20 (dd, 1H,  $J$  13.5, 9.0, H9'); 1.99 (m, 1H, H5); 1.58 (d, 1H,  $J$  14.0,  $\underline{\text{CHH}}'\text{SiMe}_3$ ); 1.50 (d, 1H,  $J$  14.0,  $\text{CHH}'\text{SiMe}_3$ ); 1.14 (d, 3H,  $J$  7.0, Me<sup>5</sup>); 0.94 (d, 3H,  $J$  7.0, Me<sup>6</sup>); 0.03 (s, 9H, SiMe<sub>3</sub>). <sup>13</sup>C NMR (CDCl<sub>3</sub>, 126 MHz)  $\delta$ : 176.9, 153.0 (C=O); 144.1 (C4); 141.0, 135.2 (*ipso*-Ph); 129.3, 128.8, 128.6, 128.4, 127.1, 126.7 (Ph); 121.3 (C3); 65.2 (C7); 54.8 (C8); 48.4 (C2); 45.3 (C1); 39.5 (C5); 37.5 (C9); 36.7 (C6); 25.1 ( $\underline{\text{CH}_2}\text{SiMe}_3$ ); 16.1 (Me<sup>6</sup>); 13.8 (Me<sup>5</sup>); -1.2 (SiMe<sub>3</sub>). IR ( $\nu$ , cm<sup>-1</sup>): 1767, 1697. HRMS: required for C<sub>29</sub>H<sub>38</sub>NO<sub>3</sub>Si ( $[M+H]^+$ ): 476.2621, found 476.2643.  $[\alpha]_D^{25}$ : +7.7 ( $c$  = 0.03, CH<sub>2</sub>Cl<sub>2</sub>).

(4*R*)-4-Benzyl-3-((1*S*,2*S*,5*S*,6*R*)-3,5,6-trimethyl-2-phenyl-4-[(trimethylsilyl)methyl]cyclohex-3-en-1-yl)carbonyl)-1,3-oxazolidin-2-one, *exo*-9

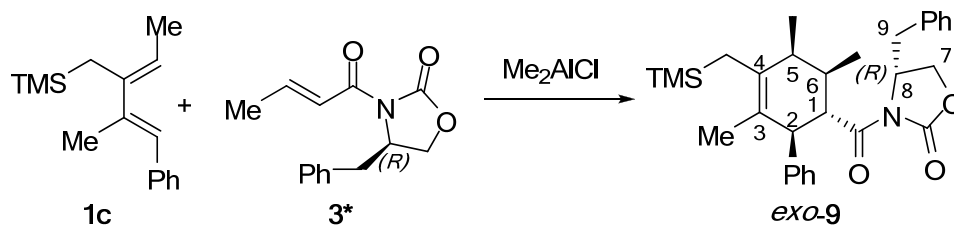

At -40 °C, dimethylaluminum chloride (1.9 mmol, 1.9 mL of a 1 M solution in hexanes) was added slowly to a solution of **3\*** (1.4 mmol, 355 mg) in CH<sub>2</sub>Cl<sub>2</sub> (15 mL). A solution of diene **1c** (1.6 mmol, 424 mg of a 5:1 (*Z,E*)/(*E,E*) mixture) in CH<sub>2</sub>Cl<sub>2</sub> (5 mL) was then added dropwise. The reaction was stirred at -40 °C for 5 h before being quenched by saturated aqueous NH<sub>4</sub>Cl (10 mL) at 0 °C. The layers were separated and the aqueous phase was further washed with Et<sub>2</sub>O (2 × 30 mL). The combined organic phases were dried, filtered and evaporated *in vacuo*. Column chromatography (hexane/diethyl ether, 4:1) afforded *exo*-**9** (65%, 460 mg) as a white solid.

$R_f$  (hexane/diethyl ether, 4:1): 0.21. <sup>1</sup>H NMR (C<sub>6</sub>D<sub>6</sub>, 500 MHz)  $\delta$ : 7.48 (d, 2H,  $J$  7.5, Ph); 7.24 (t, 2H,  $J$  7.5, Ph); 7.17–7.10 (m, 4H, Ph); 6.74–6.72 (m, 2H, Ph); 5.12 (t, 1H,  $J$  11.0, H1); 4.41 (tt, 1H,  $J$  8.5, 3.0, H8); 4.25 (d, 1H,  $J$  11.0, H2); 3.37 (dd, 1H,  $J$  8.5, 3.0, H7); 3.16 (t, 1H,  $J$  8.5, H7'); 2.96 (dd, 1H,  $J$  13.5, 3.0, H9); 2.59 (m, 1H,  $J$  7.0, H5); 2.16 (dd, 1H,  $J$  13.5, 8.5, H9'); 2.16 (m, 1H, H6); 1.91 (d, 1H,  $J$  14.0,  $\underline{\text{CHH}}'\text{SiMe}_3$ ); 1.55 (d, 1H,  $J$  14.0,  $\text{CHH}'\text{SiMe}_3$ ); 1.50 (s, 3H, Me<sup>3</sup>); 1.49 (d, 3H,  $J$  7.0, Me<sup>5</sup>); 1.20 (d, 3H,  $J$  7.0, Me<sup>6</sup>); 0.16 (s, 9H, SiMe<sub>3</sub>). <sup>13</sup>C NMR (C<sub>6</sub>D<sub>6</sub>, 126 MHz)  $\delta$ : 176.7, 153.1 (C=O); 144.3 (C4); 136.2,

135.8, 129.6, 129.0, 128.8, 128.7, 127.2, 126.9 (Ph); 123.6 (C3); 64.7 (C7); 54.9 (C8); 53.6 (C2); 47.1 (C1); 41.4 (C5); 37.8 (C9); 36.9 (C6); 22.9 ( $\underline{\text{CH}_2\text{SiMe}_3}$ ); 18.2 ( $\text{Me}^3$ ); 16.4 ( $\text{Me}^6$ ); 14.5 ( $\text{Me}^5$ );  $-0.09$  ( $\text{SiMe}_3$ ). **IR** ( $\nu$ ,  $\text{cm}^{-1}$ ): 1767, 1698. **HRMS**: required for  $\text{C}_{30}\text{H}_{40}\text{NO}_3\text{Si}$  ( $[M + \text{H}]^+$ ): 490.2777, found 490.2776.

*rac*-3-[[*(1R,2S,5R)*-5-Methyl-4-oxo-2-phenylcyclohexyl]carbonyl]-1,3-oxazolidin-2-one, *endo*-**10**

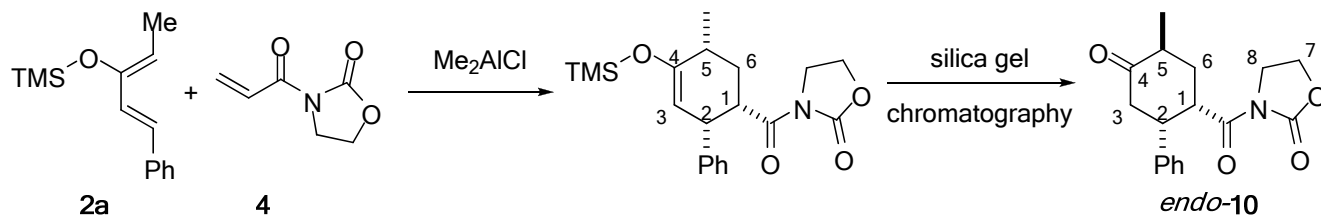

To a solution of **4** (350  $\mu\text{mol}$ , 50 mg) in  $\text{CH}_2\text{Cl}_2$  (4 mL) at  $-100$   $^\circ\text{C}$  was added dimethylaluminum chloride (490  $\mu\text{mol}$ , 490  $\mu\text{L}$  of a 1 M solution in hexanes) and the silyl enol ether **2a** (480  $\mu\text{mol}$ , 112 mg). The yellow solution was stirred for 1 h. The reaction was then quenched with saturated  $\text{NaHCO}_3$  (4 mL). The resultant slurry was diluted with dichloromethane (4 mL), and the layers were separated. The aqueous layer was extracted with dichloromethane ( $2 \times 4$  mL), and the combined organic layers were dried and concentrated *in vacuo*. After flash column chromatography over silica gel (40 $^\circ$ –60 $^\circ$  petroleum spirit/ethyl acetate, 9:1), *endo*-**10** was obtained as a white oil. (78%, 82 mg).

$R_f$  (hexane/ethyl acetate, 9:1): 0.12.  $^1\text{H NMR}$  ( $\text{C}_6\text{D}_6$ , 500 MHz)  $\delta$ : 7.04–6.92 (m, 5H, Ph); 4.32 (dt, 1H,  $J$  12.0, 4.5, H1); 3.83 (app q, 1H,  $J$  5.0, H2); 3.16–2.97 (m, 4H, H7, H8); 2.74 (dd, 1H,  $J$  15.5, 4.0, H3); 2.55 (dd, 1H,  $J$  15.5, 6.5, H3'); 2.04 (q, 1H,  $J$  13.0,  $\text{H6}^{\text{ax}}$ ); 1.94 (m, 1H, H5); 1.70 (dt, 1H,  $J$  13.5, 4.5,  $\text{H6}^{\text{eq}}$ ); 1.10 (d, 3H,  $J$  6.5,  $\text{Me}^5$ ).  $^{13}\text{C NMR}$  ( $\text{C}_6\text{D}_6$ , 126 MHz)  $\delta$ : 210.5 (C4); 173.0, 153.5 (C=O, C=O); 141.4, 129.0, 128.9, 127.6 (Ph); 61.8 (C7); 45.2 (C1); 45.0 (C3); 43.8 (C2); 43.5 (C5); 42.8 (C8); 31.4 (C6); 15.2 ( $\text{Me}^5$ ). **IR** ( $\nu$ ,  $\text{cm}^{-1}$ ): 3057, 2969, 1778, 1706, 1480, 1454, 1388, 1266, 1222, 1105. **HRMS**: required for  $\text{C}_{17}\text{H}_{20}\text{NO}_4$  ( $[M+\text{H}]^+$ ) 302.1392, found 302.1388.

*rac*-3-((1*R*,2*R*,5*R*,6*S*)-5,6-Dimethyl-2-phenyl-4-[(trimethylsilyl)oxy]cyclohex-3-en-1-yl)carbonyl-1,3-oxazolidin-2-one, *exo*-**11**

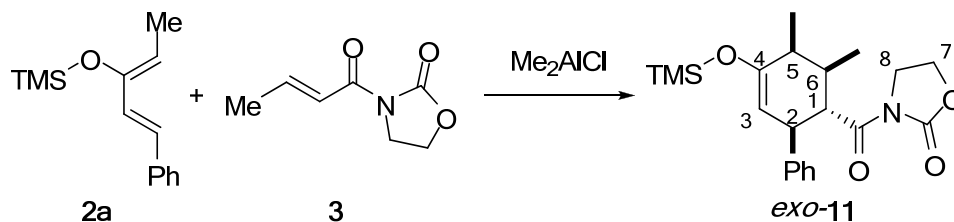

To a solution of **3** (320  $\mu$ mol, 50 mg) in  $\text{CH}_2\text{Cl}_2$  (4 mL) at  $-40\text{ }^\circ\text{C}$  was added dimethylaluminum chloride (450  $\mu$ mol, 450  $\mu$ L of a 1 M solution in hexanes) and the silyl enol ether **2a** (440  $\mu$ mol, 102 mg). The brown solution was stirred for 3 h. The reaction was then quenched with saturated  $\text{NaHCO}_3$  (4 mL). The resultant slurry was diluted with dichloromethane (4 mL), and the layers were separated. The aqueous layer was extracted with dichloromethane ( $2 \times 4$  mL), and the combined organic layers were dried and concentrated *in vacuo*. The crude mixture was purified by flash chromatography on silica gel ( $40\text{--}60^\circ$  petroleum spirit/ethyl acetate, 19:1) to yield *exo*-**11** (62%, 77 mg) as an oil.

$R_f$  (hexane/ethyl acetate, 4:1): 0.21.  $^1\text{H NMR}$  ( $\text{C}_6\text{D}_6$ , 500 MHz)  $\delta$ : 7.40 (dd, 2H,  $J$  7.5, 1.0, Ph); 7.13 (t, 2H,  $J$  7.5, Ph); 6.98 (tt, 1H,  $J$  7.5, 1.0, Ph); 4.89 (d, 1H,  $J$  2.0, H3); 4.68 (t, 1H,  $J$  10.5, H1); 4.17 (dm, 1H,  $J$  10.5, H2); 3.04 (ddd, 1H,  $J$  10.5, 9.5, 8.0, H8); 2.97 (ddd, 1H,  $J$  10.5, 9.0, 5.5, H8'); 2.88 (td, 1H,  $J$  9.0, 5.5, H7); 2.65 (q, 1H,  $J$  9.0, H7'); 2.51 (dq, 1H,  $J$  7.0, 5.0, H5); 2.25 (m, 1H, H6); 1.38 (d, 3H,  $J$  7.0, Me<sup>6</sup>); 0.98 (d, 3H,  $J$  7.0, Me<sup>5</sup>); 0.14 (s, 9H, SiMe<sub>3</sub>).  $^{13}\text{C NMR}$  ( $\text{C}_6\text{D}_6$ , 126 MHz)  $\delta$ : 176.4, 155.9, 153.5, 145.3 (C=O, C=O, C4, *ipso*-Ph); 129.1, 128.8, 127.5 (Ph); 106.5 (C3); 61.0 (C7); 47.7 (C2); 46.7 (C1); 42.6 (C8); 40.2 (C6); 37.4 (C5); 16.1 (Me<sup>6</sup>); 13.7 (Me<sup>5</sup>); 0.8 (SiMe<sub>3</sub>).  $\text{IR}$  ( $\nu$ ,  $\text{cm}^{-1}$ ): 3055, 2967, 1780, 1694, 1662, 1454, 1386, 1265, 1184, 1108, 912, 895, 846.  $\text{HRMS}$ : required for  $\text{C}_{21}\text{H}_{30}\text{NO}_4\text{Si}$  ( $[M+H]^+$ ) 388.1944, found 388.1935.



*rac*-3-((1*R*,2*R*,5*R*,6*S*)-5,6-Dimethyl-2-phenyl-4-[(triisopropylsilyl)oxy]cyclohex-3-en-1-yl)carbonyl-1,3-oxazolidin-2-one, *exo*-**12**

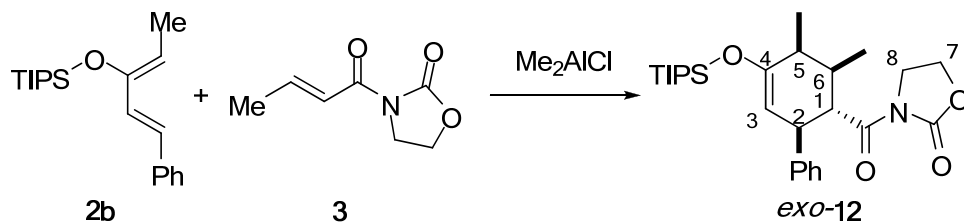

To a solution of **3** (320  $\mu\text{mol}$ , 50 mg) in  $\text{CH}_2\text{Cl}_2$  (4 mL) at  $-40\text{ }^\circ\text{C}$  was added dimethylaluminum chloride (450  $\mu\text{mol}$ , 450  $\mu\text{L}$  of a 1 M solution in hexanes) and the silyl enol ether **2b** (360  $\mu\text{mol}$ , 114 mg). The brown solution was stirred for 3.5 h. The reaction was then quenched with saturated  $\text{NaHCO}_3$  (4 mL). The resultant slurry was diluted with dichloromethane (4 mL), and the layers were separated. The aqueous layer was extracted with dichloromethane ( $2 \times 4$  mL), and the combined organic layers were dried and concentrated *in vacuo*. The product was purified by flash chromatography on silica gel ( $40^\circ\text{--}60^\circ$  petroleum spirit/ethyl acetate, 9:1) to yield *exo*-**12** (89%, 135 mg) as an oil.

$R_f$  (hexane/ethyl acetate, 4:1): 0.30.  $^1\text{H NMR}$  ( $\text{C}_6\text{D}_6$ , 500 MHz)  $\delta$ : 7.42 (d, 2H,  $J$  7.5, Ph); 7.12 (t, 2H,  $J$  7.5, Ph); 6.98 (t, 1H,  $J$  7.5, Ph); 4.89 (d, 1H,  $J$  1.5, H3); 4.70 (t, 1H,  $J$  10.5, H1); 4.21 (d, 1H,  $J$  10.5, H2); 3.08–3.02 (m, 1H, H8); 2.99 (t, 1H,  $J$  10.0, 5.5, H8'); 2.88 (td, 1H,  $J$  8.5, 5.5, H7); 2.65 (q, 1H,  $J$  8.5, H7'); 2.53 (m, 1H, H5); 2.30 (m, 1H, H6); 1.45 (d, 3H,  $J$  7.0,  $\text{Me}^6$ ); 1.09 (m, 21H,  $\text{Si}(i\text{-Pr})_3$ ); 1.01 (d, 3H,  $J$  7.0,  $\text{Me}^5$ ).  $^{13}\text{C NMR}$  ( $\text{C}_6\text{D}_6$ , 126 MHz)  $\delta$ : 176.4, 156.0, 153.5, 145.3 (C=O, C=O, C4, *ipso*-Ph); 129.1, 128.8, 127.5 (Ph); 105.3 (C3); 61.1 (C7); 47.8 (C2); 46.8 (C1); 42.6 (C8); 40.3 (C6); 37.4 (C5); 18.7 ( $\text{Si}(\underline{\text{CH}}\text{Me}_2)_3$ ); 16.1 ( $\text{Me}^6$ ); 14.1 ( $\text{Me}^5$ ); 13.3 ( $\text{Si}(\underline{\text{CH}}\text{Me}_2)_3$ ).  $\text{IR}$  ( $\nu$ ,  $\text{cm}^{-1}$ ): 3055, 2946, 2868, 1780, 1694, 1661, 1464, 1385, 1265, 1188, 1108, 1065, 884.  $\text{HRMS}$ : required for  $\text{C}_{27}\text{H}_{42}\text{NO}_4\text{Si}([M+\text{H}]^+)$  472.2883, found 472.2888.

*rac*-3-(((1*R*,2*S*,5*S*,6*R*)-2,5,6-Trimethyl-4-[(trimethylsilyl)oxy]cyclohex-3-en-1-yl)carbonyl)-1,3-oxazolidin-2-one, *exo*-**13**

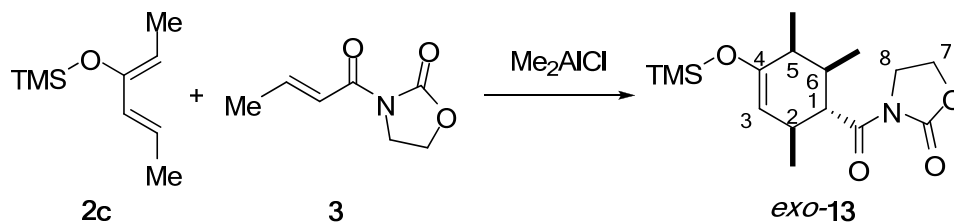

To a solution of **3** (320  $\mu\text{mol}$ , 50 mg) in  $\text{CH}_2\text{Cl}_2$  (4 mL) at  $-40\text{ }^\circ\text{C}$  was added dimethylaluminum chloride (450  $\mu\text{mol}$ , 450  $\mu\text{L}$  of a 1 *M* solution in hexanes) and the silyl enol ether **2c** (440  $\mu\text{mol}$ , 75 mg). The brown solution was stirred for 2 h. The reaction was then quenched with saturated  $\text{NaHCO}_3$  (4 mL). The resultant slurry was diluted with dichloromethane (4 mL), and the layers were separated. The aqueous layer was extracted with dichloromethane ( $2 \times 4$  mL), and the combined organic layers were dried and concentrated *in vacuo*. The product was purified by flash chromatography on silica gel (hexane/ethyl acetate, 4:1) to yield *exo*-**13** (80%, 83 mg) as an oil.

$R_f$  (hexane/ethyl acetate, 4:1): 0.24.  $^1\text{H NMR}$  ( $\text{C}_6\text{D}_6$ , 400 MHz)  $\delta$ : 4.74 (d, 1H,  $J$  2.0, H3); 4.17 (t, 1H, 10.5, H1); 3.19 (dd, 1H,  $J$  7.5, 1.5, H8); 3.16 (d, 1H,  $J$  7.5, H8'); 3.06–2.97 (m, 3H, H2, H7, H7'); 2.38 (m, 1H, H6); 2.15 (m, 1H, H5); 1.25 (d, 3H,  $J$  7.0,  $\text{Me}^5$ ); 1.05 (d, 3H,  $J$  7.0,  $\text{Me}^2$ ); 0.93 (d, 3H,  $J$  7.0,  $\text{Me}^6$ ); 0.20 (s, 9H,  $\text{SiMe}_3$ );  $^{13}\text{C NMR}$  ( $\text{C}_6\text{D}_6$ , 126 MHz)  $\delta$ : 177.4, 155.0, 153.8 (C=O, C=O, C4); 108.0 (C3); 61.2 (C7); 46.2 (C1); 42.8 (C8); 40.1 (C5); 37.3 (C6); 35.4 (C2); 21.5 ( $\text{Me}^2$ ); 16.1 ( $\text{Me}^6$ ); 13.7 ( $\text{Me}^5$ ); 0.8 ( $\text{SiMe}_3$ ). **IR** ( $\nu$ ,  $\text{cm}^{-1}$ ): 3055, 2965, 1780, 1694, 1386, 1266, 1192, 1103, 887, 845. **HRMS**: required for  $\text{C}_{16}\text{H}_{28}\text{NO}_4\text{Si}$  ( $[M+\text{H}]^+$ ) 326.1788, found 326.1781.

(4*R*)-4-Benzyl-3-(((1*R*,2*S*,5*S*,6*R*)-2,5,6-trimethyl-4-[(triisopropylsilyl)oxy]cyclohex-3-en-1-yl)carbonyl)-1,3-oxazolidin-2-one, *exo*-**14**

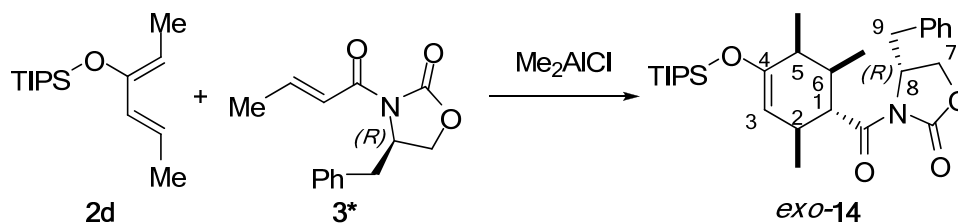

To a solution of **3\*** (200  $\mu\text{mol}$ , 50 mg) in  $\text{CH}_2\text{Cl}_2$  (2.5 mL) at  $-40\text{ }^\circ\text{C}$  was added dimethylaluminum chloride (280  $\mu\text{mol}$ , 280  $\mu\text{L}$  of a 1 M solution in hexanes) and silyl enol ether **2d** (220  $\mu\text{mol}$ , 61 mg of a 15:1 (*Z,E*)/(*E,E*) mixture). The yellow solution was stirred for 2 h. The reaction was then quenched with saturated  $\text{NaHCO}_3$  (3 mL). The resultant slurry was diluted with dichloromethane (3 mL), and the layers were separated. The aqueous layer was extracted with dichloromethane ( $2 \times 3$  mL), and the combined organic layers were dried and concentrated *in vacuo*. The product was purified by flash chromatography on silica gel ( $40^\circ\text{--}60^\circ$  petroleum spirit/ethyl acetate, 4:1) to yield *exo*-**14** (48%, 48 mg) as a yellow oil.

**R<sub>f</sub>** (hexane/ethyl acetate, 4:1): 0.45. **<sup>1</sup>H NMR** ( $\text{C}_6\text{D}_6$ , 400 MHz)  $\delta$ : 7.17–7.11 (m, 3H, Ph); 6.99 (m, 2H, Ph); 4.90 (m, 1H, H3); 4.46–4.40 (m, 1H, H8); 4.36 (t, 1H, *J* 10.5, H1); 3.54 (dd, 1H, *J* 9.0, 3.0, H7); 3.31 (dd, 1H, *J* 13.0, 3.0, H9); 3.24 (t, 1H, *J* 8.5, H7'); 3.20–3.10 (m, 1H, H2); 2.58–2.49 (m, 1H, H5); 2.36–2.31 (m, 1H, H6); 2.27 (dd, 1H, *J* 13.0, 10.5, H9'); 1.42 (d, 3H, *J* 7.0,  $\text{Me}^6$ ); 1.29–1.24 (m, 24H,  $\text{Si}(i\text{-Pr})_3$ ,  $\text{Me}^2$ ); 1.06 (d, 3H, *J* 7.0,  $\text{Me}^5$ ); **<sup>13</sup>C NMR** ( $\text{C}_6\text{D}_6$ , 126 MHz)  $\delta$ : 177.4, 155.1, 153.9 (C=O, C=O, C4); 136.5, 130.0, 129.3, 127.6 (Ph); 107.3 (C3); 65.6 (C7); 56.0 (C8); 46.4 (C1); 40.2 (C5); 38.6 (C9); 37.3 (C6); 35.8 (C2); 21.6 ( $\text{Me}^2$ ); 18.7 ( $\text{Si}(\text{CHMe}_2)_3$ ); 16.1 ( $\text{Me}^6$ ); 14.0 ( $\text{Me}^5$ ); 13.4 ( $\text{Si}(\text{CHMe}_2)_3$ ); **IR** ( $\nu$ ,  $\text{cm}^{-1}$ ): 2962, 2868, 1782, 1694, 1454, 1384, 1262, 1100, 801. **HRMS**: required for  $\text{C}_{29}\text{H}_{46}\text{NO}_4\text{Si}$  ( $[M+H]^+$ ) 500.3196, found 500.3190;  $[\alpha]_D^{25}$ :  $-9.00$  ( $c = 0.20$ ,  $\text{CH}_2\text{Cl}_2$ ).

1-(6-Methyl-2-phenyl-4-((trimethylsilyl)methyl)cyclohex-3-enyl)ethanone –  
 [*rac*-(1*R*,2*S*,6*S*): *endo*-**15** (major)] [*rac*-(1*R*,2*R*,6*S*): *exo*-**15** (minor)]

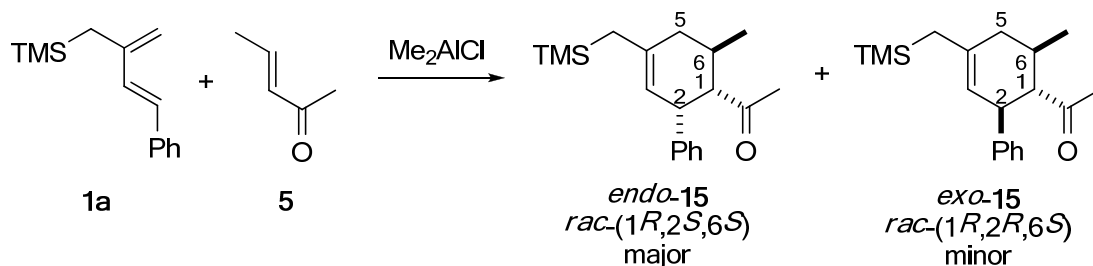

To a solution of (*E*)-pent-3-en-2-one (**5**) at  $-40\text{ }^\circ\text{C}$  (53 mg, 0.63 mmol) in  $\text{CH}_2\text{Cl}_2$  (6 mL) was added dropwise dimethylaluminum chloride (0.20 mL, 1 M solution in hexanes, 0.20 mmol) followed by a solution of **1a** (150 mg, 0.69 mmol) in  $\text{CH}_2\text{Cl}_2$  (1.5 mL). The reaction mixture was warmed to room

temperature and stirred for 7.5 hours. The reaction was quenched by saturated  $\text{NH}_4\text{Cl}(\text{aq})$  (6 mL), diluted by  $\text{Et}_2\text{O}$  and transferred to a separation funnel. The phases were separated. The aqueous phase was extracted with  $\text{Et}_2\text{O}$  ( $2 \times 7$  mL). The combined organic phases were dried over  $\text{MgSO}_4$ , filtered and evaporated under reduced pressure to furnish the crude product, which was purified by column chromatography ( $40^\circ\text{--}60^\circ$  petroleum spirit /  $\text{Et}_2\text{O}$ , 95:5) to afford the minor isomer, *exo*-**15**, as a colorless oil (28 mg, 15%) and the major isomer, *endo*-**15**, as a colorless oil (118 mg, 62%).

The diastereoselectivity of the cycloaddition was determined by  $^1\text{H}$  NMR after aqueous workup. Integration of the signal due to H3 of the major isomer ( $\delta_{\text{H}}$  5.23) versus that of the minor isomer ( $\delta_{\text{H}}$  5.17) gave the crude *endo/exo* ratio as 4:1.

Major isomer, *endo*-**15**.  $R_f$  (hexane /  $\text{Et}_2\text{O}$ , 94:6): 0.19.  $^1\text{H}$  NMR ( $\text{C}_6\text{D}_6$ , 400 MHz)  $\delta$ : 7.12–7.01 (m, 5H, Ph); 5.23 (dt, 1H,  $J$  3.5, 1.0, H3); 3.62 (m, 1H, H2); 2.50 (dd, 1H,  $J$  10.5, 6.0, H1); 2.21–2.12 (m, 1H, H6); 2.07 (dd, 1H,  $J$  17.5, 5.5,  $\text{H5}^{\text{eq}}$ ); 1.56 (ddm, 1H,  $J$  17.5, 9.5,  $\text{H5}^{\text{ax}}$ ); 1.49 (s, 3H,  $\text{COMe}$ ); 1.46 (d, 1H,  $J$  13.5,  $\text{CHH}'\text{SiMe}_3$ ); 1.39 (d, 1H,  $J$  13.5,  $\text{CHH}'\text{SiMe}_3$ ); 0.84 (d, 3H,  $J$  6.5,  $\text{Me}^6$ ); 0.05 (s, 9H,  $\text{SiMe}_3$ ).  $^{13}\text{C}$  NMR ( $\text{C}_6\text{D}_6$ , 126 MHz)  $\delta$ : 208.1 (C=O); 142.1, 135.6 (C4, *ipso*-Ph); 129.7, 128.3, 127.0 (Ph); 120.9 (C3); 59.4 (C1); 44.4 (C2); 39.3 (C5); 29.7 ( $\text{COMe}$ ), 27.6 ( $\text{CH}_2\text{SiMe}_3$ ), 25.8 (C6), 20.5 ( $\text{Me}^6$ ),  $-1.0$  ( $\text{SiMe}_3$ ). IR ( $\nu$ ,  $\text{cm}^{-1}$ ): 3490, 2955, 1712. HRMS: required for  $\text{C}_{19}\text{H}_{29}\text{OSi}$  ( $[M+\text{H}]^+$ ) 301.1988, found 301.1985.

Minor isomer, *exo*-**15**.  $R_f$  (hexane /  $\text{Et}_2\text{O}$ , 94:6): 0.28.  $^1\text{H}$  NMR ( $\text{C}_6\text{D}_6$ , 400 MHz)  $\delta$ : 7.17–7.01 (m, 5H, Ph); 5.17 (s, 1H, H3); 3.76 (dm, 1H,  $J$  10.5, H2); 2.30 (t, 1H,  $J$  10.5, H1); 2.19–2.08 (m, 1H, H6); 1.83 (dd, 1H,  $J$  17.5, 5.0,  $\text{H5}^{\text{eq}}$ ); 1.73–1.65 (ddm, 1H,  $J$  17.5, 11.0,  $\text{H5}^{\text{ax}}$ ); 1.51 (s, 3H,  $\text{COMe}$ ); 1.40 (d, 1H,  $J$  13.7,  $\text{CHH}'\text{SiMe}_3$ ); 1.36 (d, 1H,  $J$  13.7,  $\text{CHH}'\text{SiMe}_3$ ); 0.76 (d, 3H,  $J$  6.5,  $\text{Me}^6$ ); 0.02 (s, 9H,  $\text{SiMe}_3$ ).  $^{13}\text{C}$  NMR ( $\text{C}_6\text{D}_6$ , 126 MHz)  $\delta$ : 211.6 (C=O); 145.3, 135.3 (C4, *ipso*-Ph); 128.8, 126.8 (Ph); 123.0 (C3); 62.7 (C1); 48.1 (C2); 40.2 (C5); 33.3, 32.7 ( $\text{COMe}$ , C6); 27.5 ( $\text{CH}_2\text{SiMe}_3$ ), 19.7 ( $\text{Me}^6$ ),  $-1.1$  ( $\text{SiMe}_3$ ). HRMS: required for  $\text{C}_{19}\text{H}_{32}\text{NOSi}$  ( $[M+\text{NH}_4]^+$ ) 318.2253, found 318.2269.

1-(5-Methyl-2-phenyl-4-((trimethylsilyl)methyl)cyclohex-3-enyl)ethanone –  
 [*rac*-(1*R*,2*S*,5*S*): *endo*-**16**] [*rac*-(1*R*,2*S*,5*R*): *exo*-**16**]

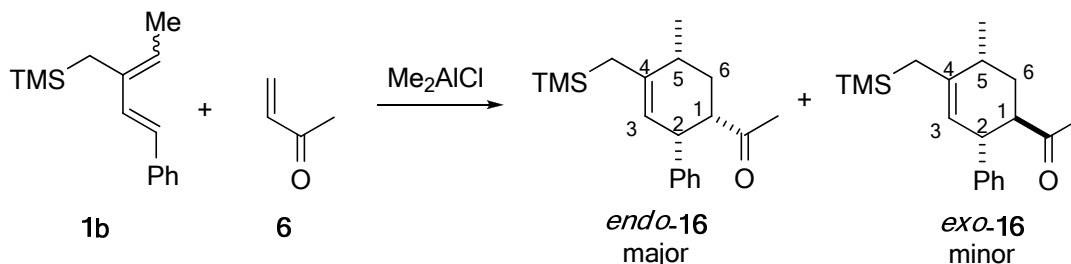

To a solution of methyl vinyl ketone (**6**) (44 mg, 0.63 mmol) in  $\text{CH}_2\text{Cl}_2$  (5 mL) cooled at  $-40^\circ\text{C}$  was added dimethylaluminum chloride (0.13 mL, 0.13 mmol of a 1 M solution in hexanes), followed by dropwise addition of solution of **1b** (207 mg, 0.90 mmol, *Z/E* = 3:1) in  $\text{CH}_2\text{Cl}_2$  (1 mL). The reaction mixture was warmed to room temperature and stirred for 4 hours. The reaction was quenched by saturated  $\text{NH}_4\text{Cl}$ (aq) (6 mL), diluted by  $\text{Et}_2\text{O}$  and transferred to a separation funnel. The phases were separated. The aqueous phase was extracted with  $\text{Et}_2\text{O}$  ( $2 \times 7$  mL). The combined organic phases were dried over  $\text{MgSO}_4$ , filtered and evaporated under reduced pressure to furnish the crude product, which was purified by column chromatography ( $40^\circ\text{--}60^\circ$  petroleum spirit /  $\text{Et}_2\text{O}$ , 9:1) to furnish the minor isomer, *exo*-**16** (7 mg, 4%), and the major isomer, *endo*-**16** (75 mg, 40%), both as a colorless oil.

The diastereoselectivity of the cycloaddition was determined by  $^1\text{H}$  NMR after aqueous workup. Integration of the signal due to H2 of the major isomer ( $\delta_{\text{H}}$  3.77) versus that of the minor isomer ( $\delta_{\text{H}}$  3.94) gave the crude *endo/exo* ratio as 10:1.

Major isomer, *endo*-**16**.  $R_f$  (hexane /  $\text{Et}_2\text{O}$ , 9:1): 0.18.  $^1\text{H}$  NMR ( $\text{C}_6\text{D}_6$ , 400 MHz)  $\delta$ : 7.17 (d, 2H, *J* 7.5, Ph); 7.11 (t, 2H, *J* 7.5, Ph); 7.02 (t, 1H, *J* 7.5, Ph); 5.20 (d, 1H, *J* 5.5, H3); 3.77 (app t, 1H, *J* 5.5, H2); 2.63 (ddd, 1H, *J* 13.0, 5.5, 3.0, H1); 2.01–1.92 (m, 1H, H5); 1.68 (d, 1H, *J* 14.0,  $\text{CHH}'\text{SiMe}_3$ ); 1.60 (td, 1H, *J* 13.0, 11.0,  $\text{H6}^{\text{ax}}$ ); 1.51 (ddd, 1H, *J* 11.0, 6.0, 3.0,  $\text{H6}^{\text{eq}}$ ); 1.51 (s, 3H, COMe); 1.39 (d, 1H, *J* 14.0,  $\text{CHH}'\text{SiMe}_3$ ); 1.02 (d, 3H, *J* 7.0,  $\text{Me}^5$ ); 0.03 (s, 9H,  $\text{SiMe}_3$ ).  $^{13}\text{C}$  NMR ( $\text{C}_6\text{D}_6$ , 126 MHz)  $\delta$ : 208.5 (C=O); 141.0, 140.1 (C4, *ipso*-Ph); 129.9, 128.3, 127.1 (Ph); 122.3 (C3); 53.2 (C1); 44.4 (C2); 34.1

(C5); 29.6 (C6); 28.4 (COMe); 24.5 (CH<sub>2</sub>SiMe<sub>3</sub>); 20.3 (Me<sup>5</sup>); -0.9 (SiMe<sub>3</sub>). IR ( $\nu$ , cm<sup>-1</sup>): 2954, 1711.

HRMS: calculated for C<sub>19</sub>H<sub>29</sub>OSi ([M+H]<sup>+</sup>) 301.1988, found 301.1982.

Minor isomer, *exo*-**16**. R<sub>f</sub> (hexane / Et<sub>2</sub>O, 9:1): 0.28. <sup>1</sup>H NMR (C<sub>6</sub>D<sub>6</sub>, 400 MHz)  $\delta$ : 7.27 (d, 2H, *J* 8.0, Ph); 7.15 (t, 2H, *J* 8.0, Ph); 7.05 (t, 1H, *J* 8.0, Ph); 5.17 (m, 1H, H<sub>3</sub>); 3.94 (d, 1H, *J* 9.0, H<sub>2</sub>); 2.71 (ddd, 1H, *J* 12.5, 9.0, 3.0, H<sub>1</sub>); 2.05–1.98 (m, 1H, H<sub>5</sub>); 1.83 (td, 1H, *J* 12.5, 5.5, H<sub>6</sub><sup>ax</sup>); 1.58 (s, 3H, COMe); 1.47–1.41 (m, 3H, H<sub>6</sub><sup>eq</sup>, CH<sub>2</sub>SiMe<sub>3</sub>); 1.06 (d, 3H, *J* 7.0, Me<sup>5</sup>); -0.02 (s, 9H, SiMe<sub>3</sub>). <sup>13</sup>C NMR (C<sub>6</sub>D<sub>6</sub>, 126 MHz)  $\delta$ : 209.3 (C=O); 145.9, 140.0 (C<sub>4</sub>, *ipso*-Ph); 128.8, 128.5, 126.7 (Ph); 122.5 (C<sub>3</sub>); 51.2 (C<sub>1</sub>); 44.8 (C<sub>2</sub>); 33.3, 33.2 (C<sub>5</sub>, C<sub>6</sub>); 29.5 (COMe); 25.1 (CH<sub>2</sub>SiMe<sub>3</sub>); 19.8 (Me<sup>5</sup>); -1.1 (SiMe<sub>3</sub>). HRMS: required for C<sub>19</sub>H<sub>29</sub>OSi ([M+H]<sup>+</sup>) 301.1988, found 301.1982.

1-{5,6-Dimethyl-2-phenyl-4-[(trimethylsilyl)methyl]cyclohex-3-en-1-yl}ethanone –  
[*rac*-(1*R*,2*R*,5*R*,6*S*): *exo*-**17a** (major)], [*rac*-(1*R*,2*R*,5*S*,6*S*): *exo*-**17b** (minor)]  
[*rac*-(1*R*,2*S*,5*R*,6*S*): *endo*-**17c** (minor)] [*rac*-(1*R*,2*S*,5*S*,6*S*): *endo*-**17d** (minor)]

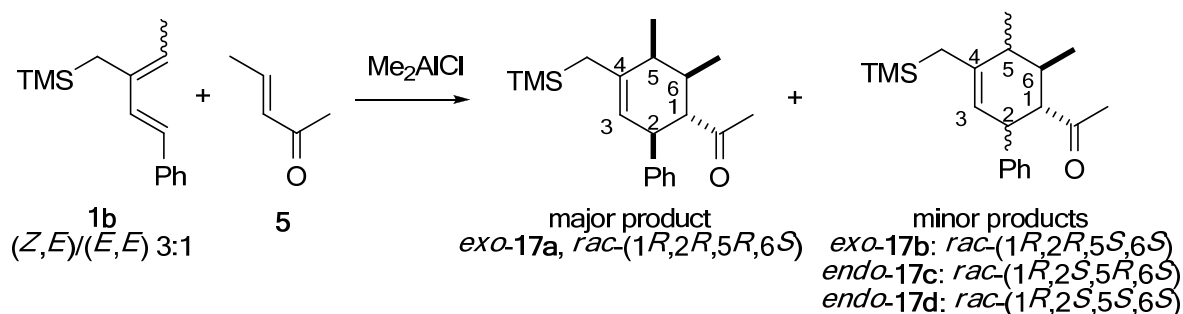

To a solution of (*E*)-pent-3-en-2-one (**5**) (62 mg, 0.63 mmol) in CH<sub>2</sub>Cl<sub>2</sub> (5 mL) cooled at -40 °C was added dimethylaluminum chloride (0.13 mL, 0.13 mmol of a 1 M solution in hexanes), followed by a solution of **1b** (207 mg, 0.90 mmol, *Z/E* = 3:1) in CH<sub>2</sub>Cl<sub>2</sub> (1 mL) added dropwise. The reaction mixture was warmed to room temperature and stirred for 4 hours. The reaction was quenched by saturated NH<sub>4</sub>Cl(aq) (6 mL), diluted by Et<sub>2</sub>O and transferred to a separation funnel. The phases were separated. The aqueous phase was extracted with Et<sub>2</sub>O (2 × 7 mL). The combined organic phases were dried over MgSO<sub>4</sub>, filtered and evaporated under reduced pressure to furnish the crude product, which was purified by column chromatography (40°–60° petroleum spirit / Et<sub>2</sub>O, 9:1). The inseparable C<sub>5</sub>-epimeric mixture

of cycloadducts *exo*-**17a** and *exo*-**17b** was obtained as a colorless oil (154 mg, 78%, **17a** / **17b** = 5:1 by <sup>1</sup>H NMR).

The diastereoselectivity of the cycloaddition was determined by <sup>1</sup>H NMR after aqueous workup. Analysis of integration of the signal due to H3 of the major *exo* isomer (**17a**, δ<sub>H</sub> 5.13, s), the minor *exo* isomer (**17b**, δ<sub>H</sub> 5.23, s), and the *endo* isomers (δ<sub>H</sub> 5.30, 5.16, both doublets, tentatively assigned based on NMR coupling constants) gave the d.r. as approximately **17a**:**17b**:(two *endo* isomers) = 11:0.5:(1.8:0.7).

Exo cycloadducts. **R<sub>f</sub>** (hexane / Et<sub>2</sub>O, 94:6): 0.27. Exo-17a. <sup>1</sup>H NMR (400 MHz, C<sub>6</sub>D<sub>6</sub>) δ: 7.20–7.02 (m, 5H, Ph); 5.13 (s, 1H, H3); 3.82 (d, *J* 11.0, 1H, H2); 2.61 (t, *J* 11.0, 1H, H1); 2.32–2.23 (m, 1H, H5); 1.87–1.80 (m, 1H, H6); 1.57 (s, 3H, COMe); 1.48 (d, *J* 14.0, 1H, CHH'SiMe<sub>3</sub>); 1.38 (d, 1H, *J* 14.0, CHH'SiMe<sub>3</sub>); 0.96 (d, *J* 7.0, 3H, Me<sup>6</sup>); 0.77 (d, *J* 7.0, 3H, Me<sup>5</sup>); –0.02 (s, 9H, SiMe<sub>3</sub>). <sup>13</sup>C NMR (126 MHz, C<sub>6</sub>D<sub>6</sub>) δ: 211.7 (C=O); 145.6 (C4); 141.3, 128.9, 128.3, 126.8 (Ph); 121.8 (C3); 56.3 (C1); 48.1 (C2); 39.7, 35.8 (C5, C6); 33.4 (COMe); 25.3 (CH<sub>2</sub>SiMe<sub>3</sub>); 16.9 (Me<sup>6</sup>); 14.0 (Me<sup>5</sup>); –1.1 (SiMe<sub>3</sub>). Exo-17b. <sup>1</sup>H NMR (400 MHz, C<sub>6</sub>D<sub>6</sub>) δ: 7.20–7.02 (m, 5H, Ph); 5.23 (s, 1H, H3); 3.66 (d, 1H, *J* 11.0, H2); 2.44 (t, 1H, *J* 11.0, H1); 1.87–1.81 (m, 1H), 1.77–1.69 (m, 1H) (H5, H6); 1.62 (s, 3H, COMe); 1.38 (d, 1H, *J* 12.0, CHH'SiMe<sub>3</sub>); 1.33 (d, 1H, *J* 12.0, CHH'SiMe<sub>3</sub>); 0.99 (d, 3H, *J* 6.8), 0.83 (d, 3H, *J* 6.3) (Me<sup>5</sup>, Me<sup>6</sup>); 0.05 (s, 9H, SiMe<sub>3</sub>). <sup>13</sup>C NMR (126 MHz, C<sub>6</sub>D<sub>6</sub>) δ: 211.5 (C=O); 145.1 (C4); 139.5, 126.9 (Ph); 124.4 (C3); 62.8 (C1); 47.4 (C2); 41.6, 39.9 (C5, C6); 33.0 (COMe); 24.9 (CH<sub>2</sub>SiMe<sub>3</sub>); 18.4, 17.9 (Me<sup>5</sup>, Me<sup>6</sup>); –0.8 (SiMe<sub>3</sub>). **HRMS:** required for C<sub>20</sub>H<sub>34</sub>NOSi ([*M*+NH<sub>4</sub>]<sup>+</sup>) 332.2410, found 332.2411. Integration of the signal due to H3, H2, H1, Me<sup>5</sup> or Me<sup>6</sup> protons of the two isomers gave the diastereomeric ratio of *exo*-**17a**:*exo*-**17b** = 5:1.

# C. NMR Spectra

## Diene **1c**

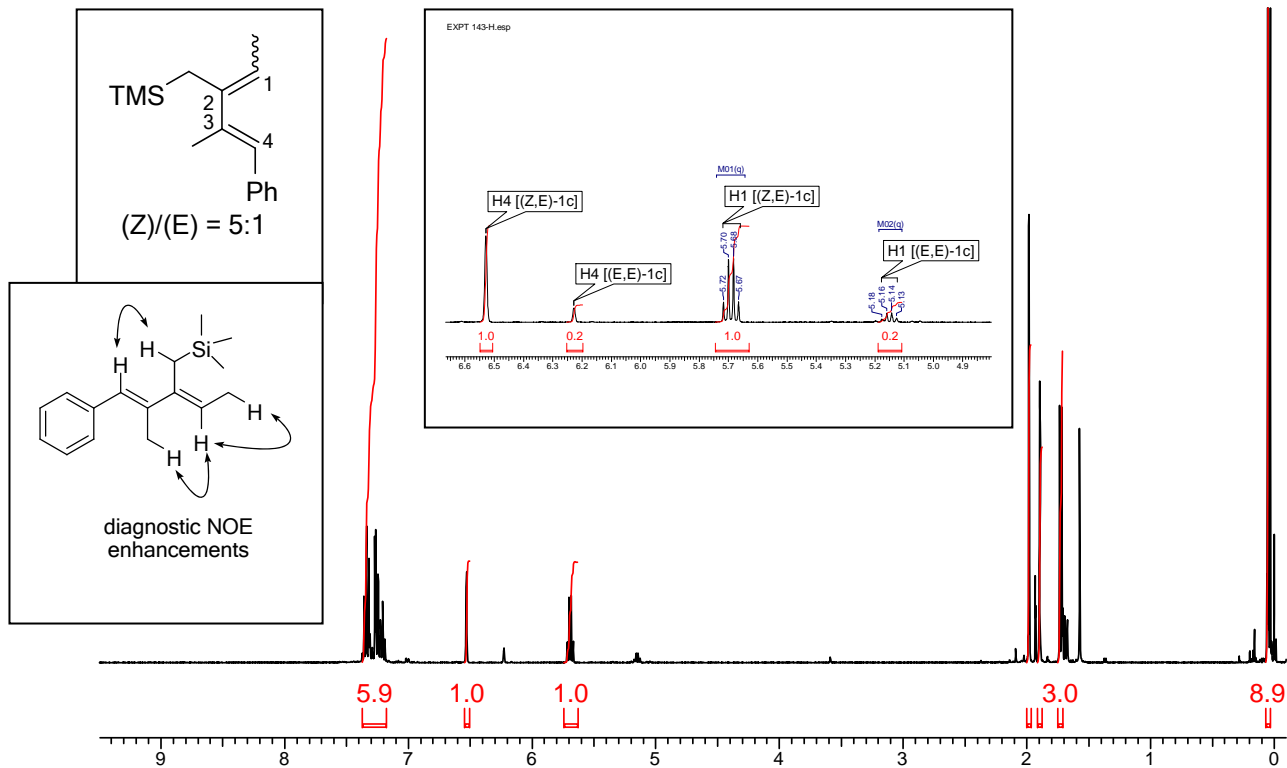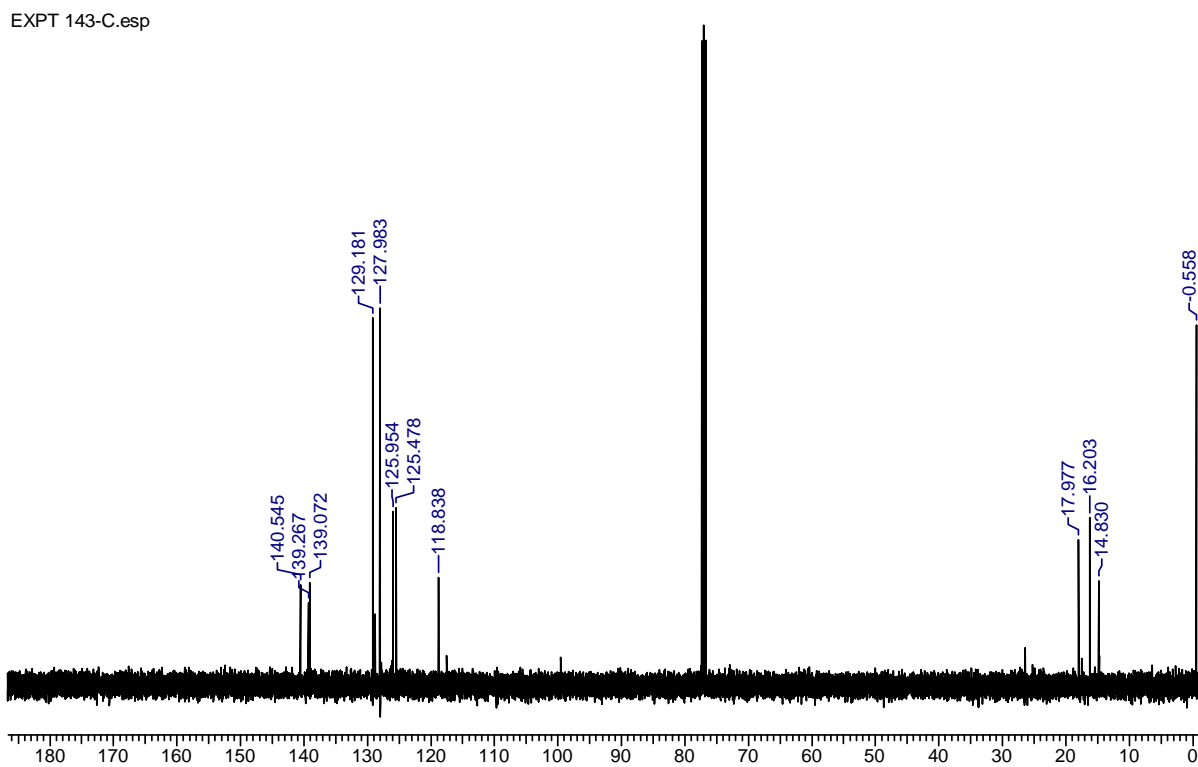



# Cycloadduct *exo*-8

EXPT 146-H.esp

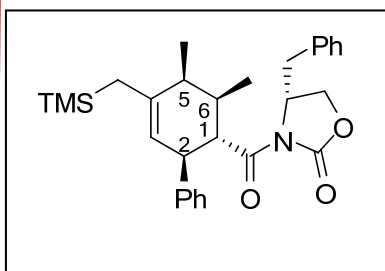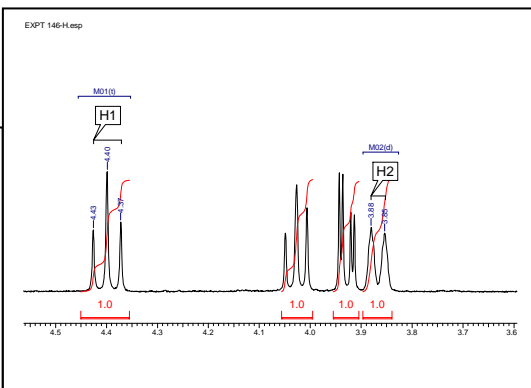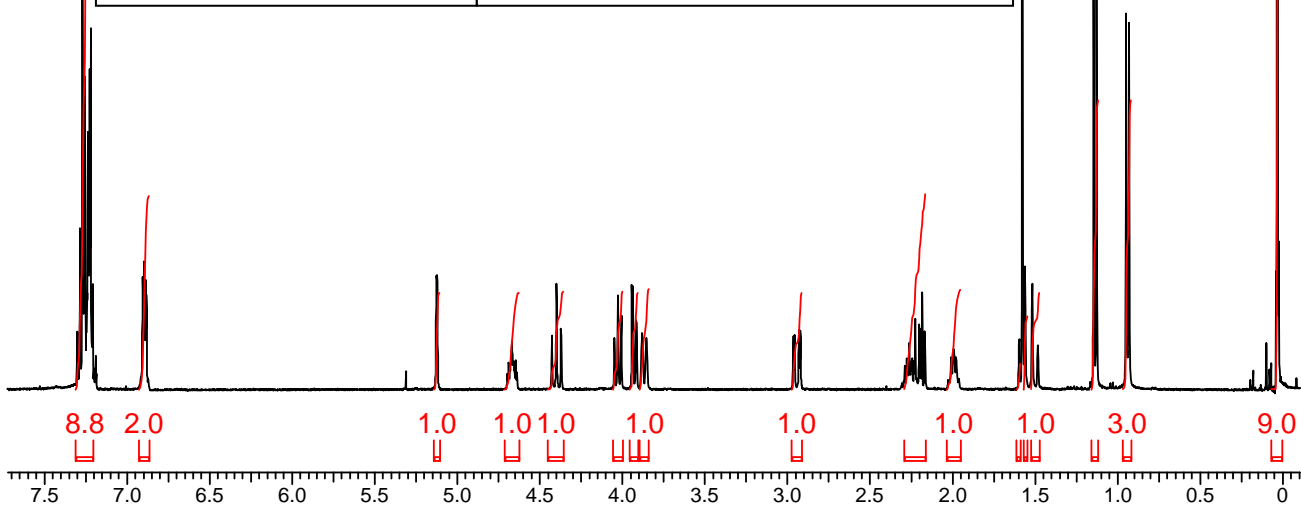

EXPT 146-C.esp

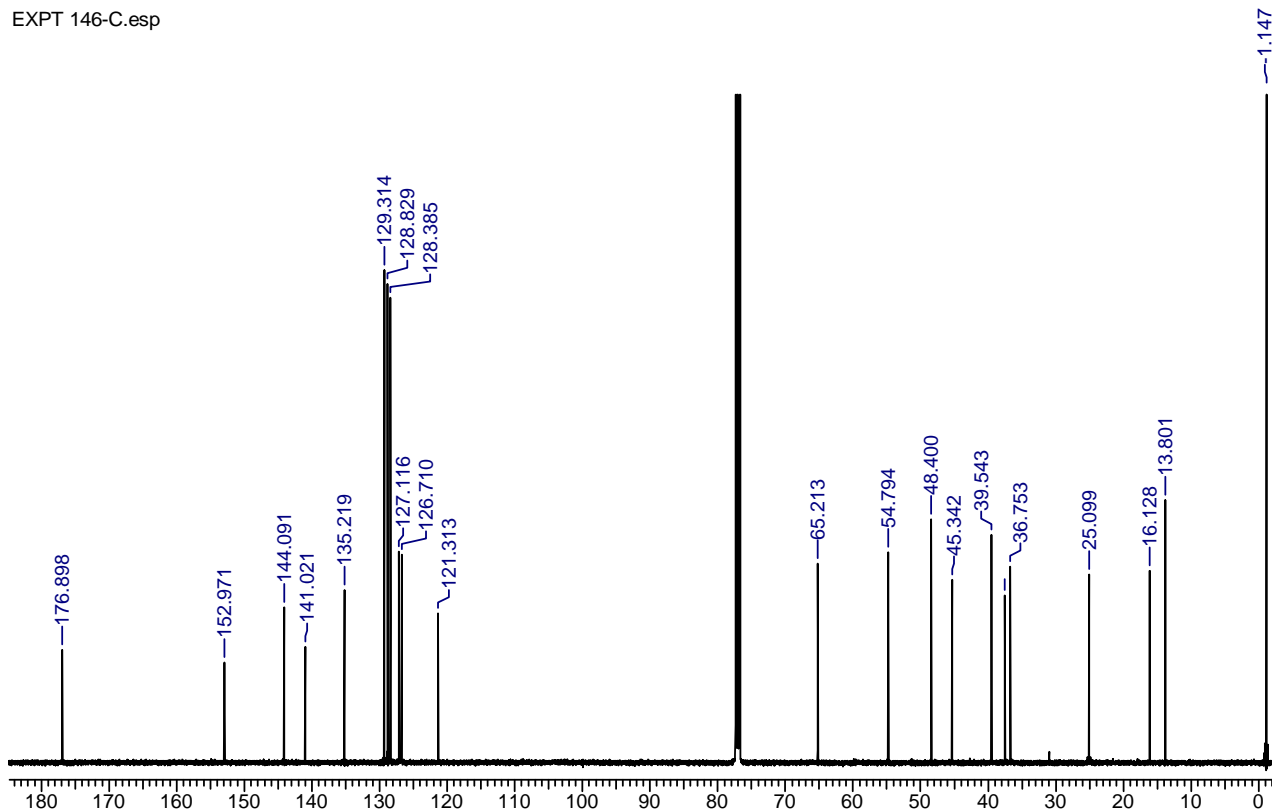

# Cycloadduct *exo*-9

EXPT 132-H.esp

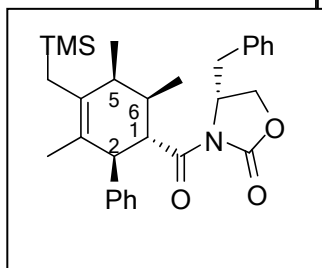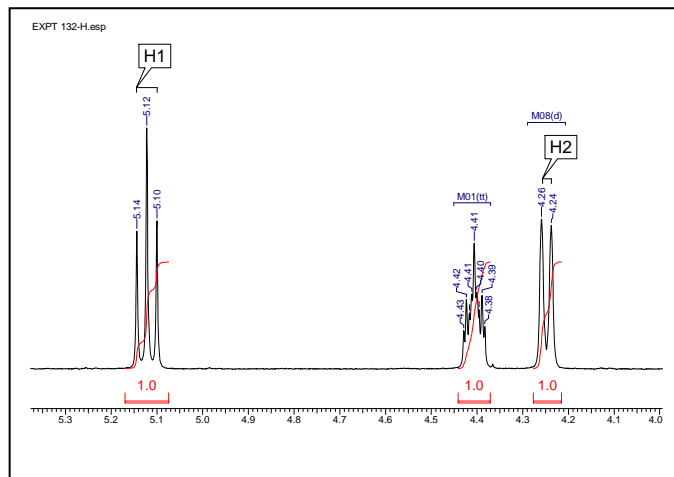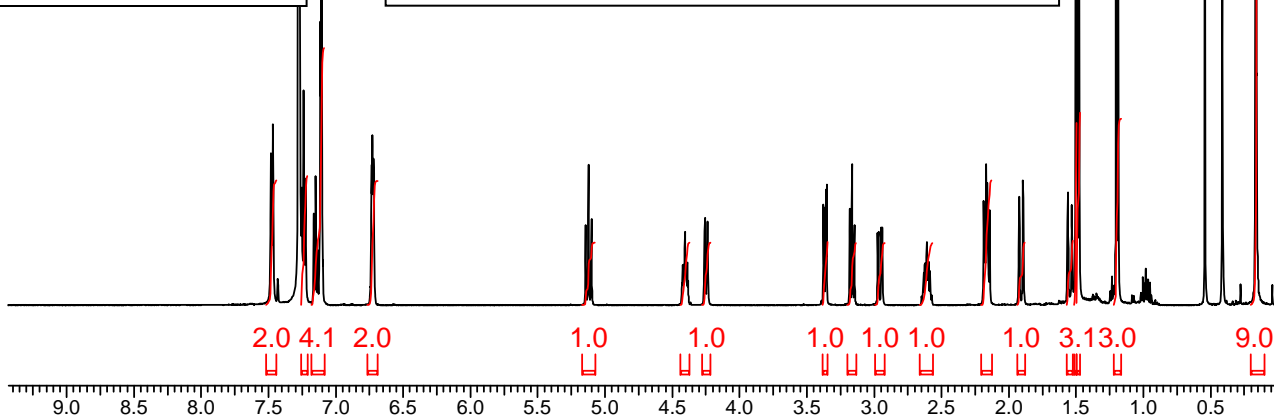

EXPT 132-C.esp

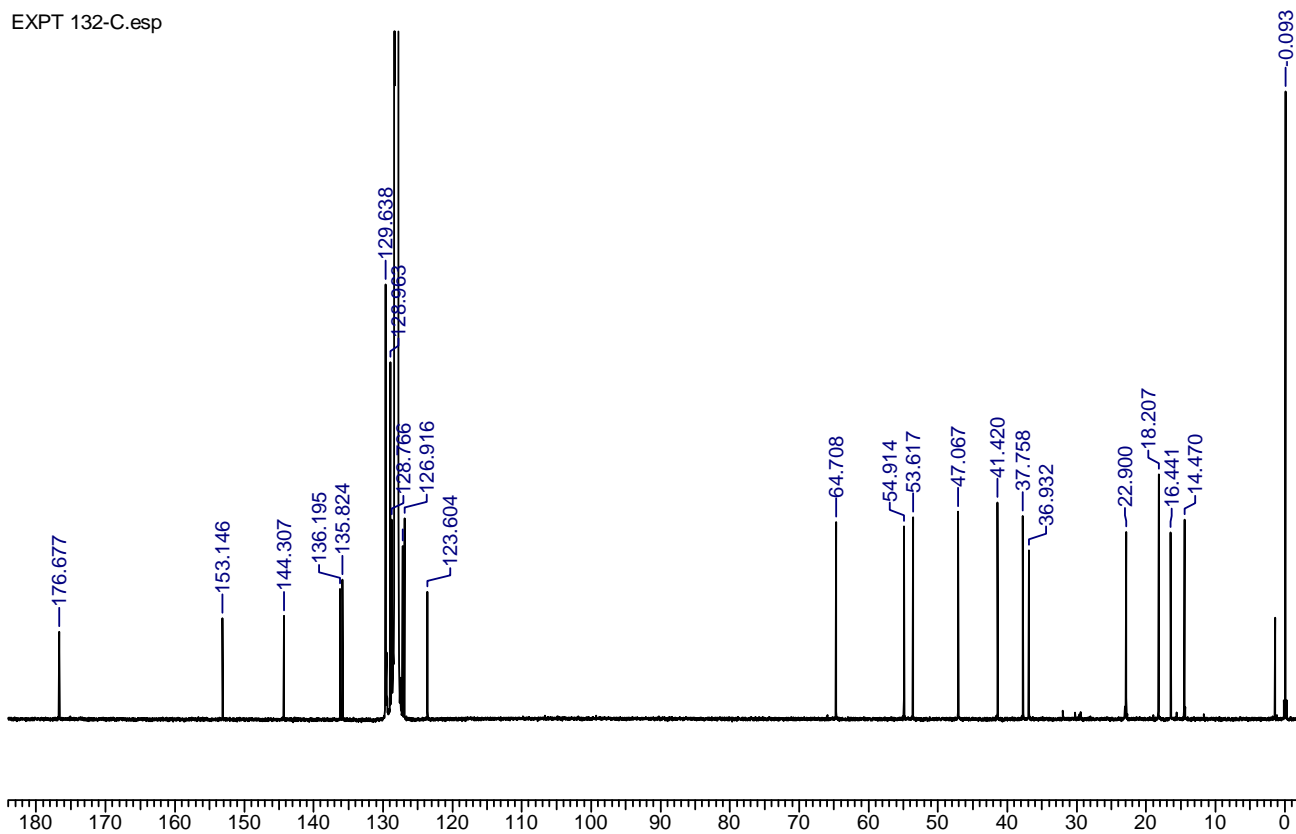

# Cycloadduct *endo*-10

ENDO-10-H-JM02320605\_001001R.ESP

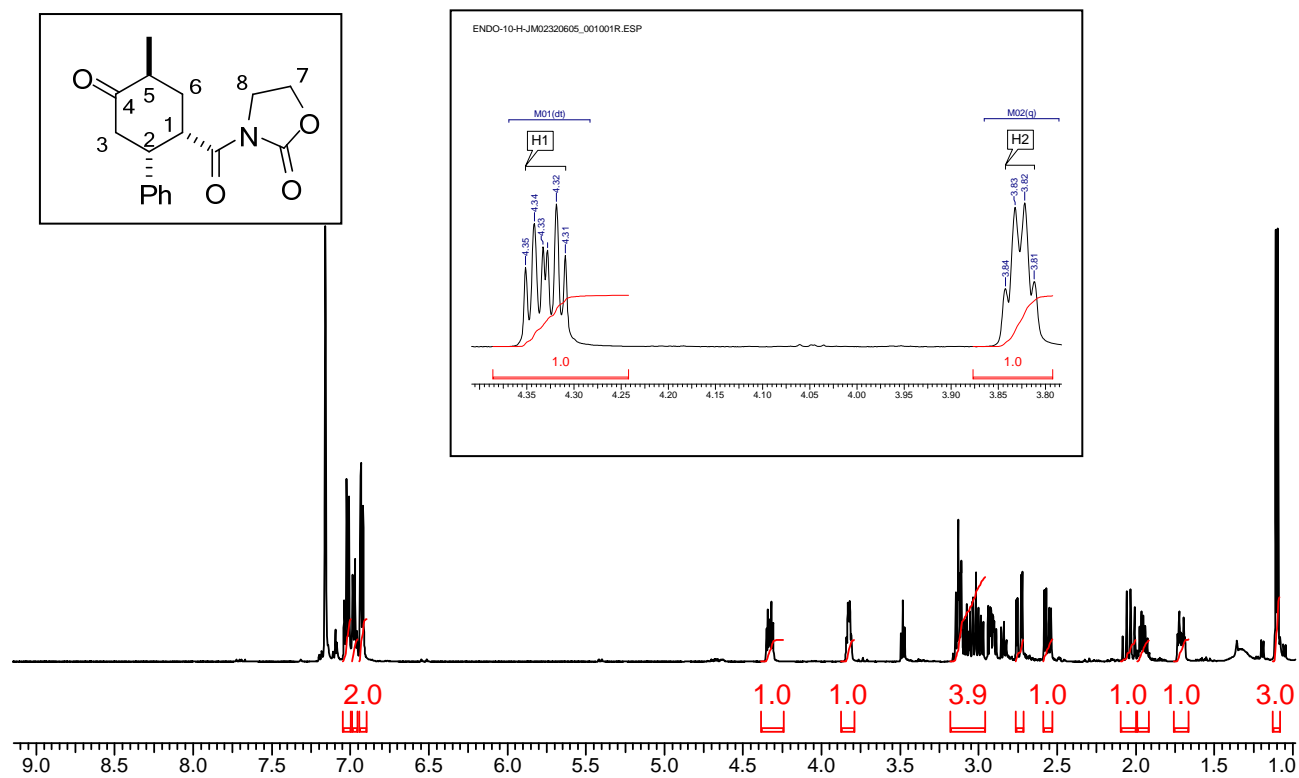

endo-10-C-jm02320605\_003001r.esp

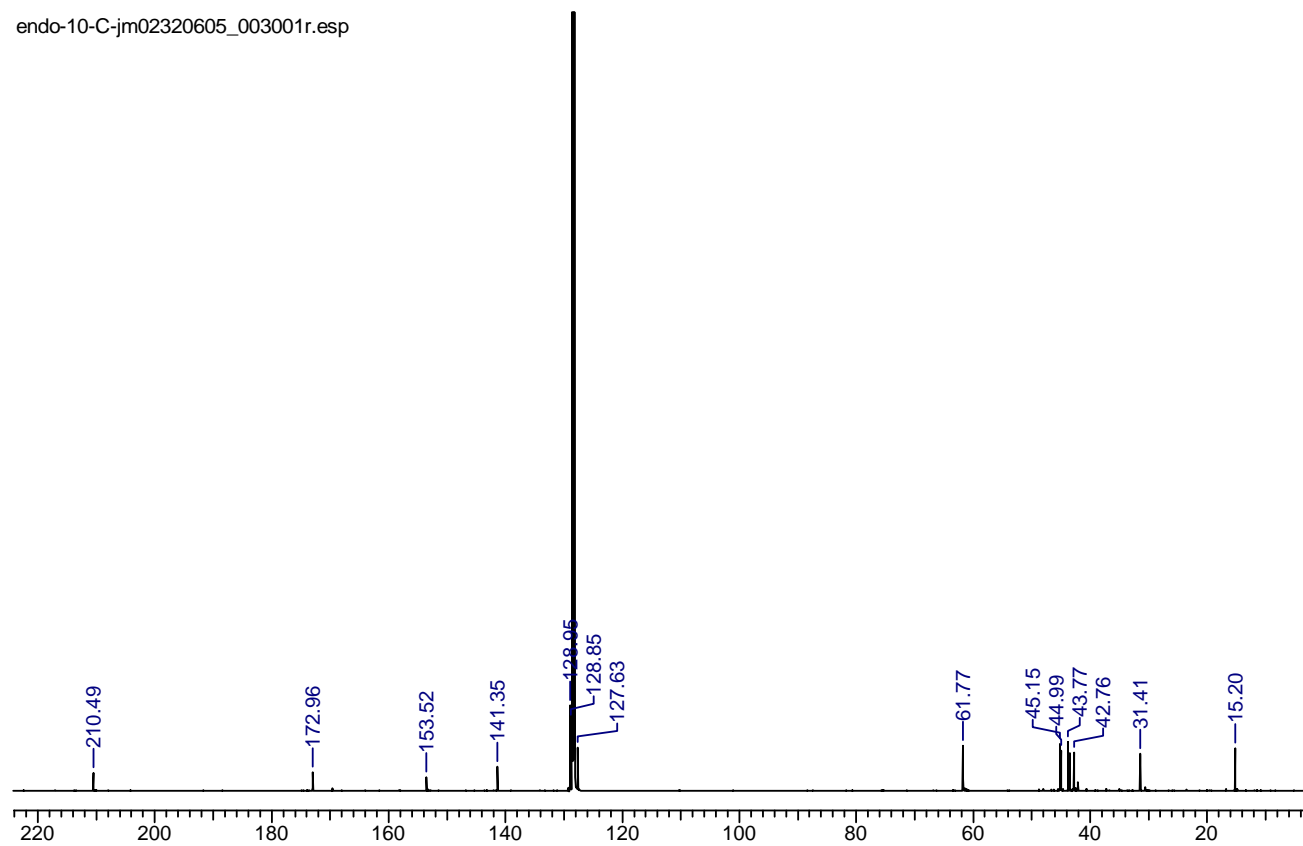

# Cycloadduct **exo-11**

EXO-11-H.ESP

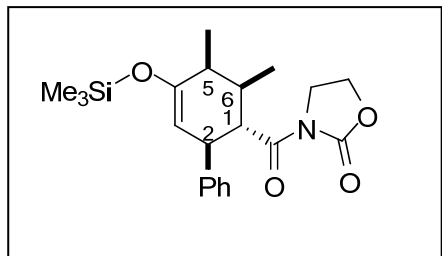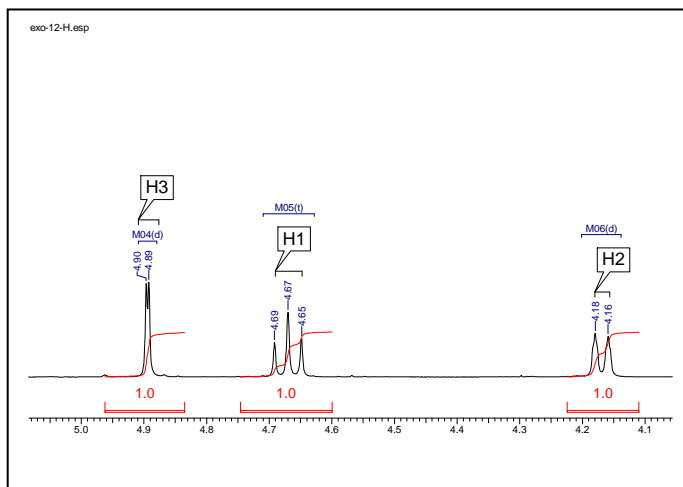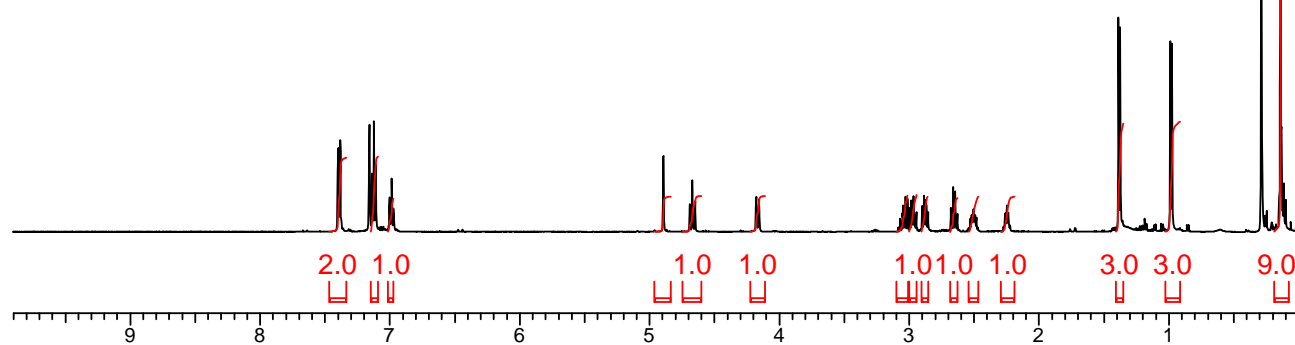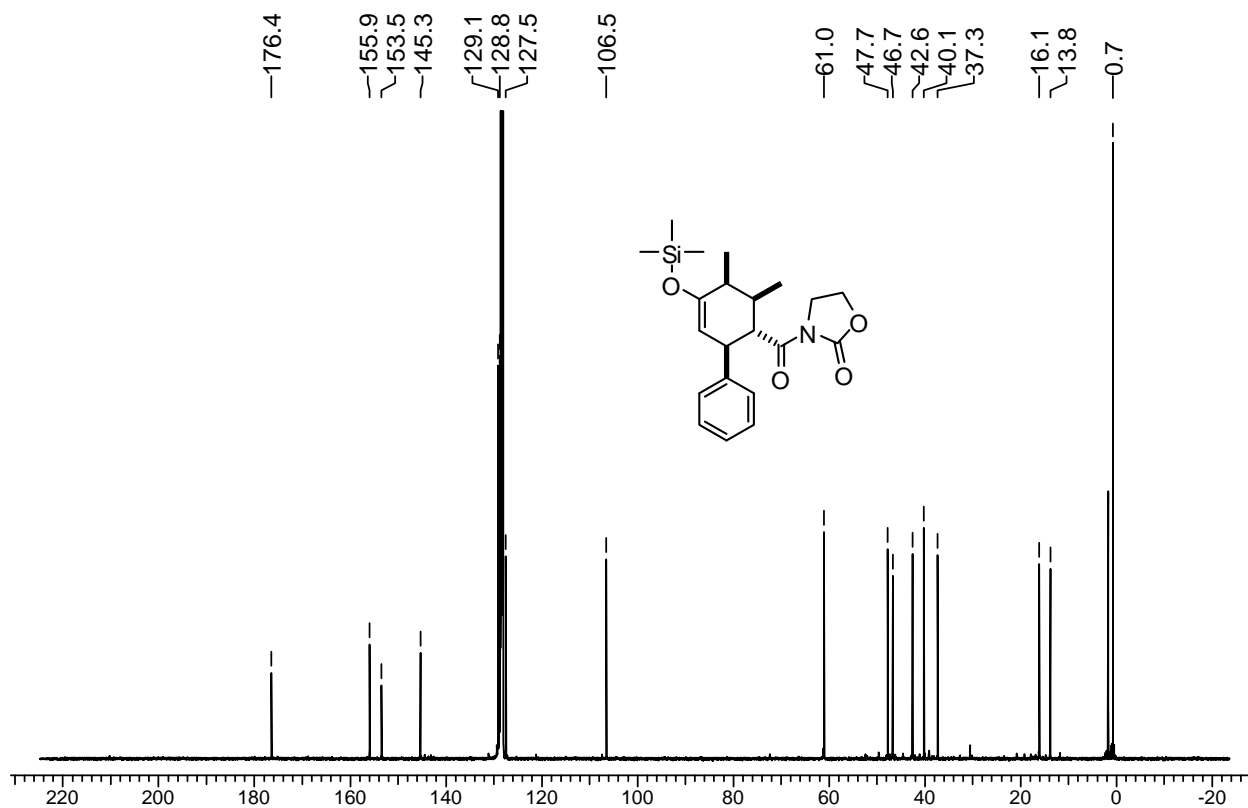

# Cycloadduct **exo-12**

EXO-12-H-(JM01433004\_001001R).ESP

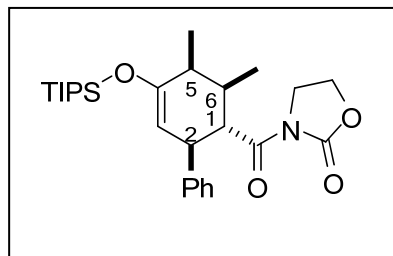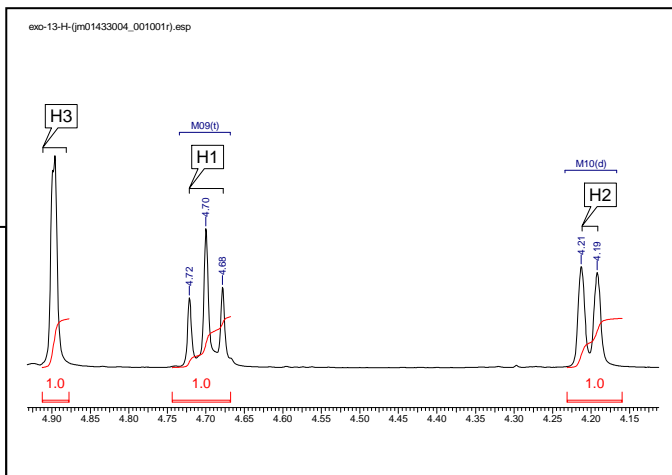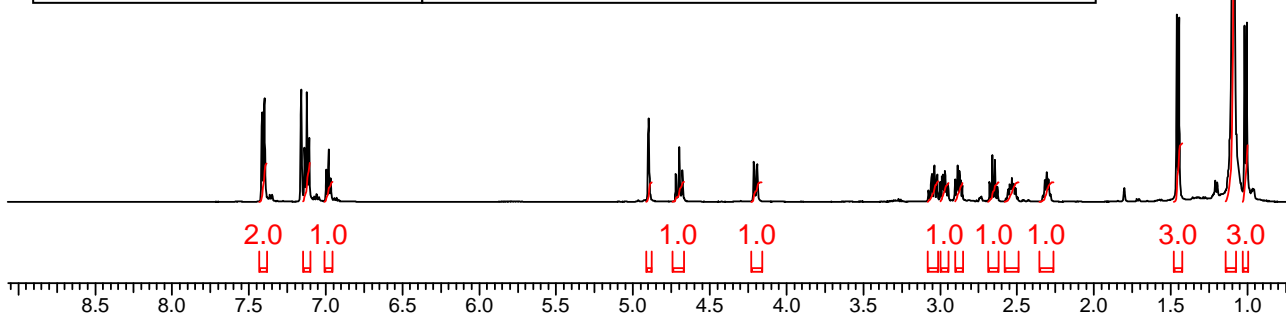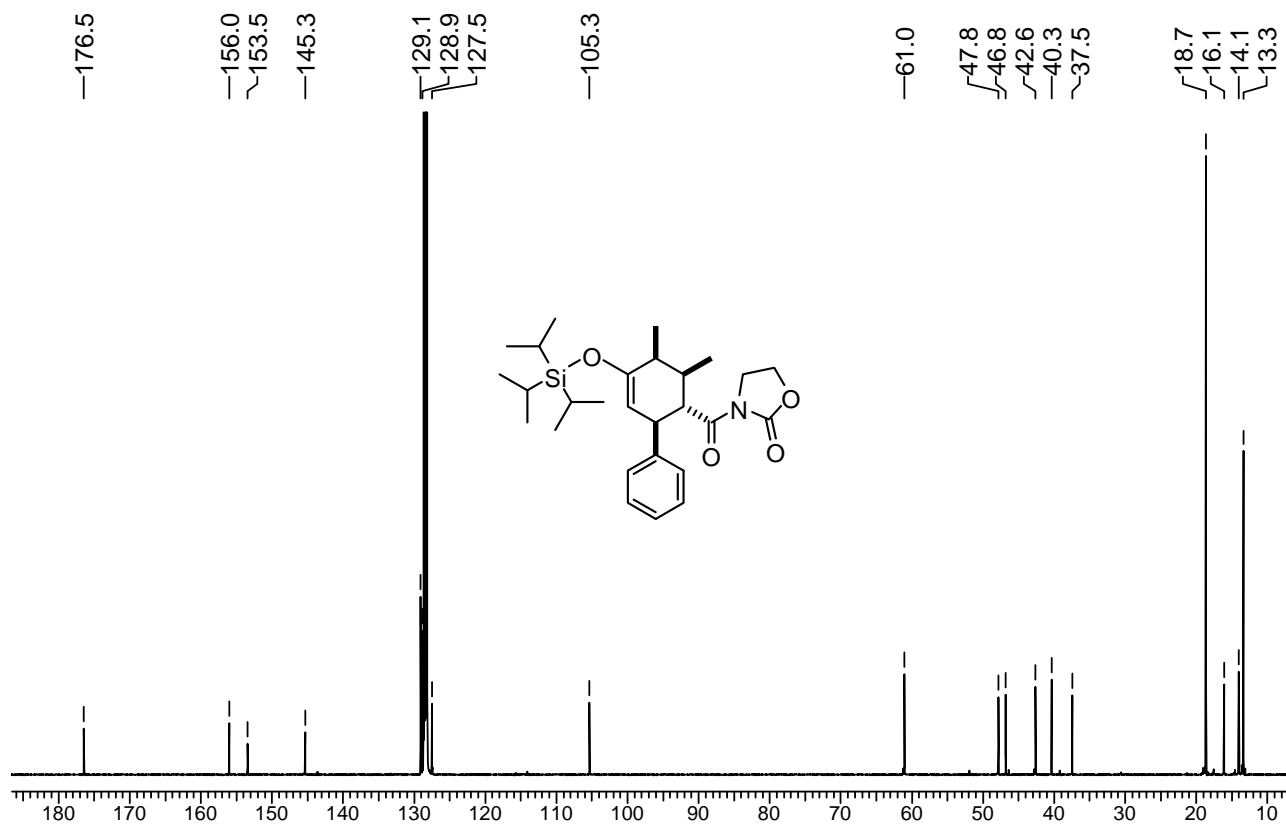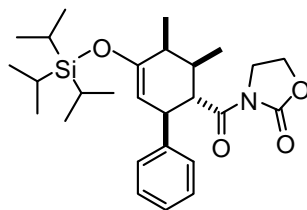

# Cycloadduct **exo-13**

exo-13-H-(Sep02-2008-15\_001001r).esp

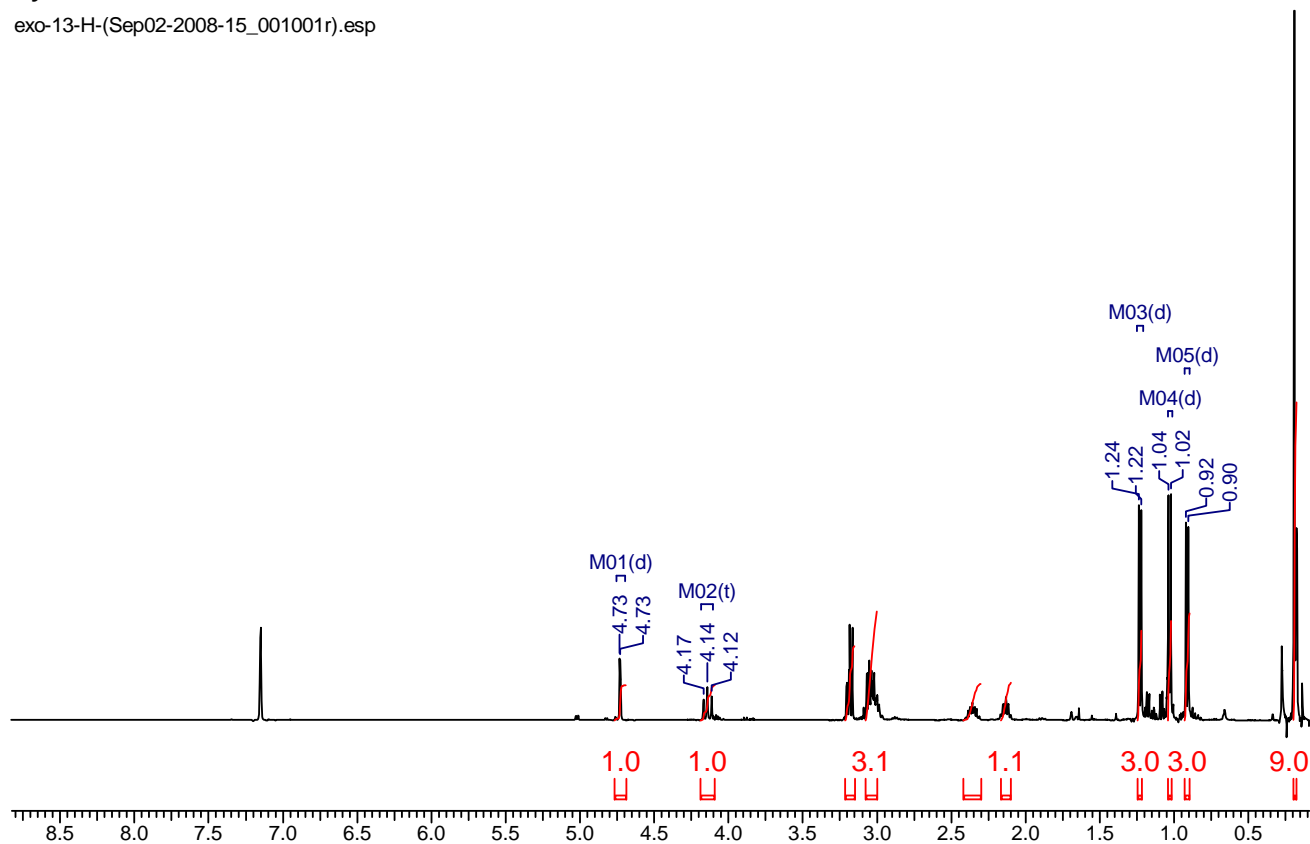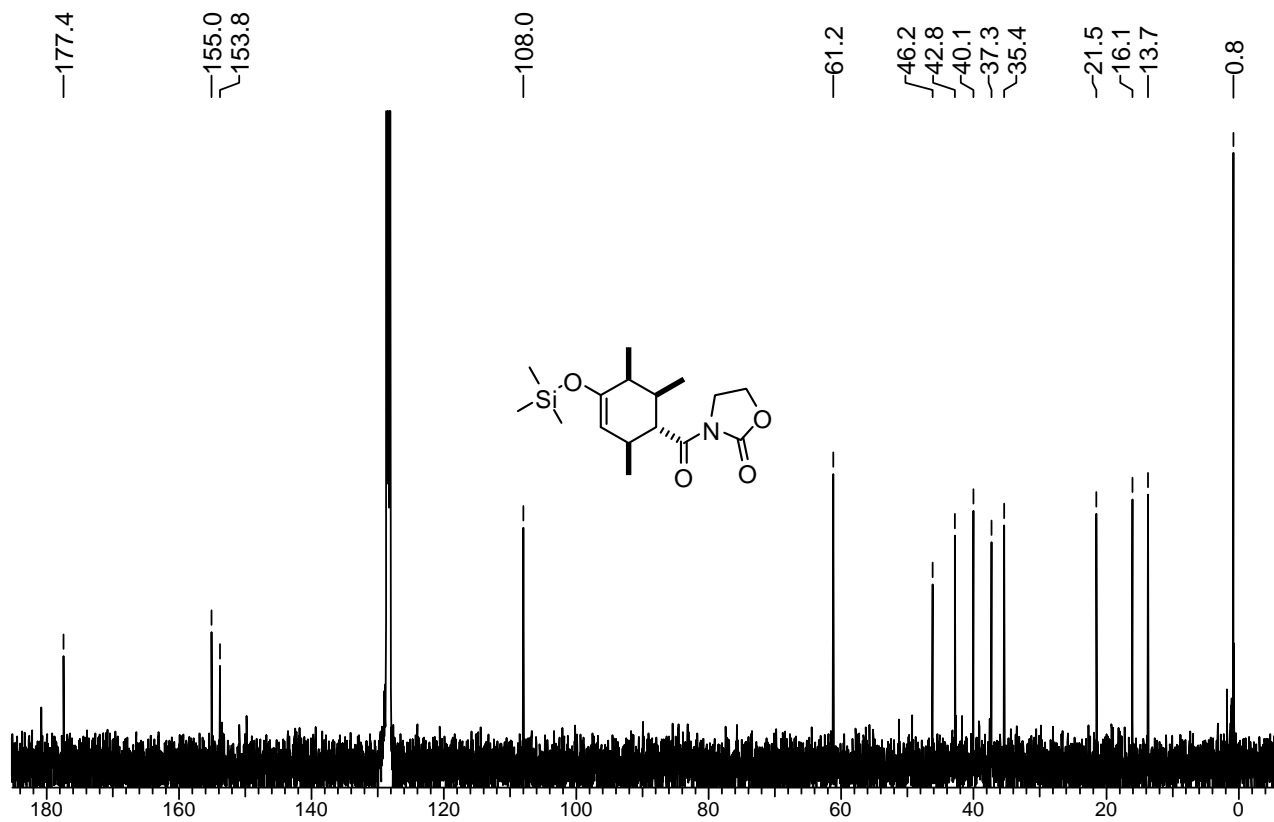

# Cycloadduct **exo-14**

EXO-14-(JMB-572)-H.ESP

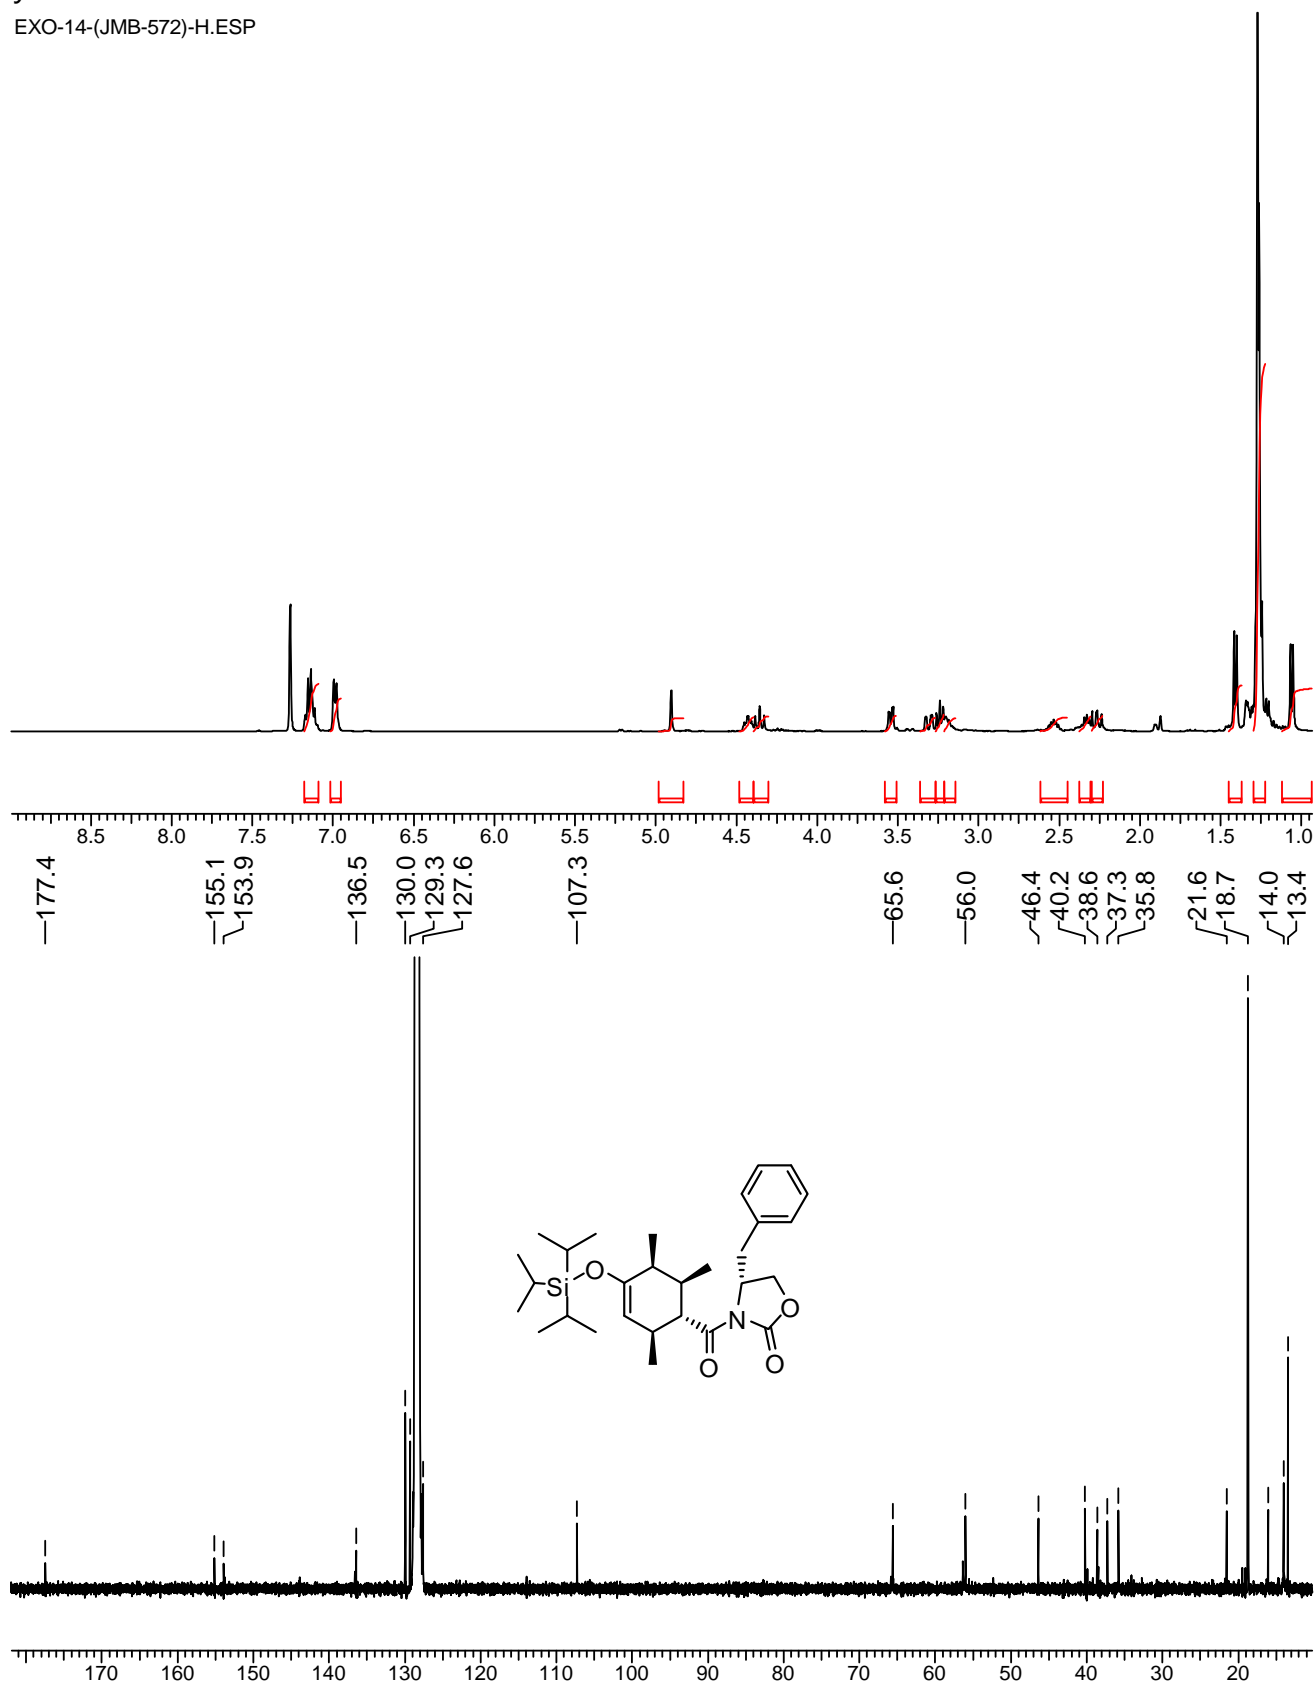

# Cycloadduct *endo*-15

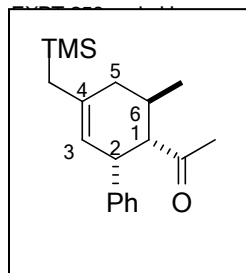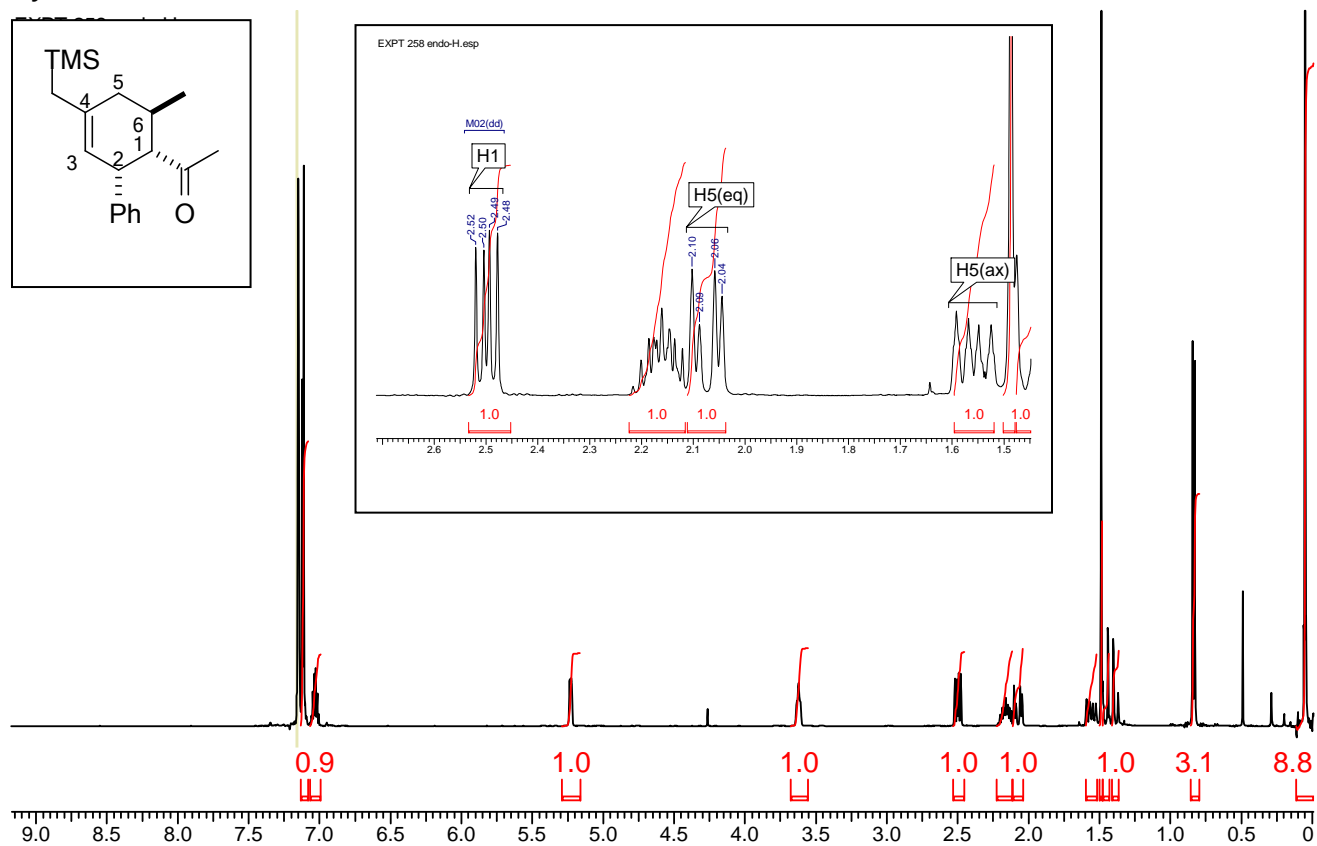

EXPT 258 endo-C.esp

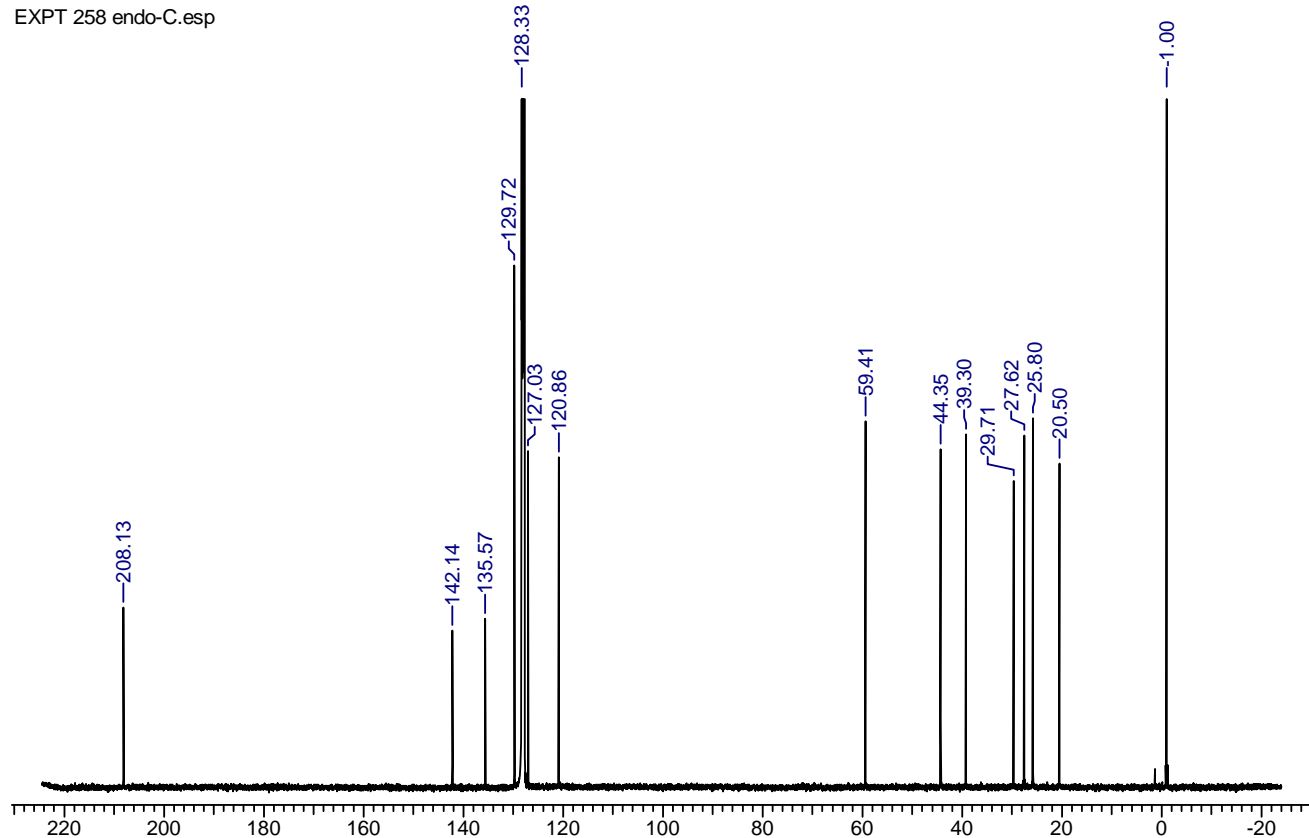



# Cycloadduct **exo-15**

EXPT 258 **exo-H.esp**

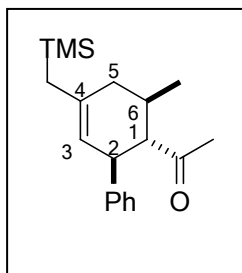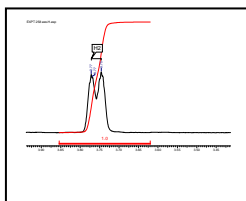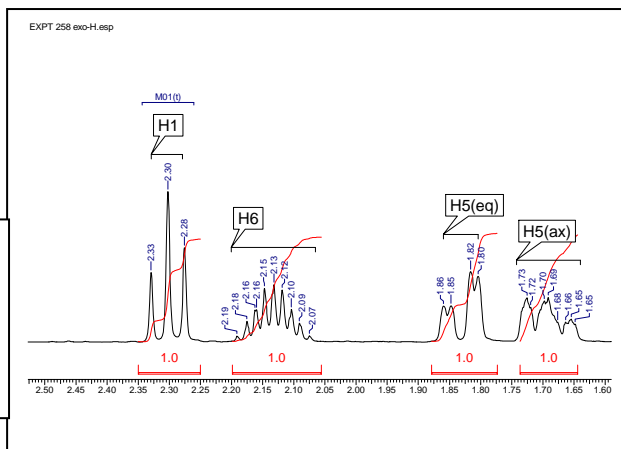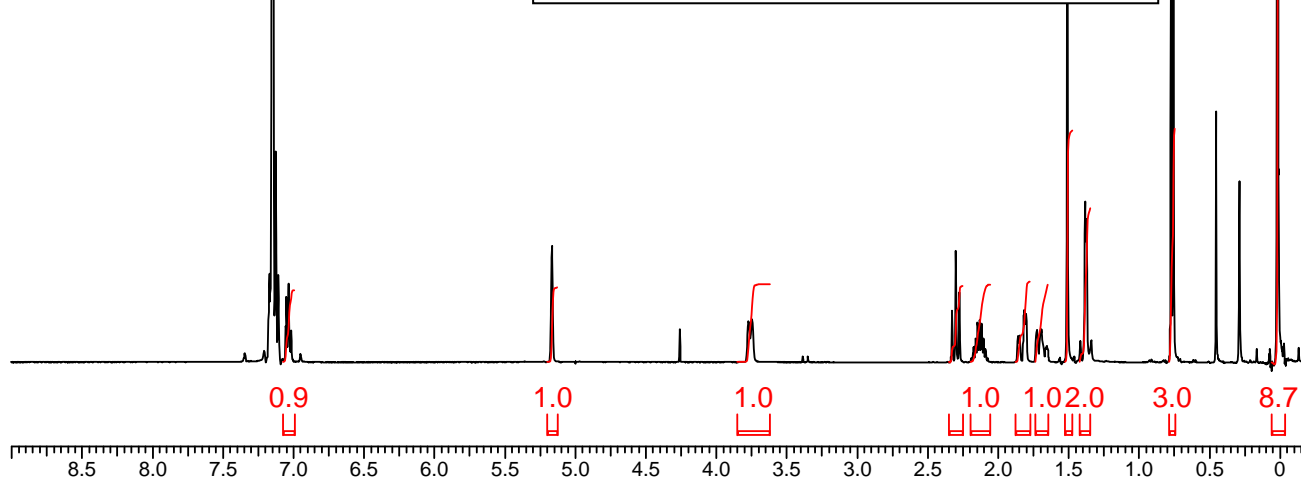

EXPT 258 **exo-C.esp**

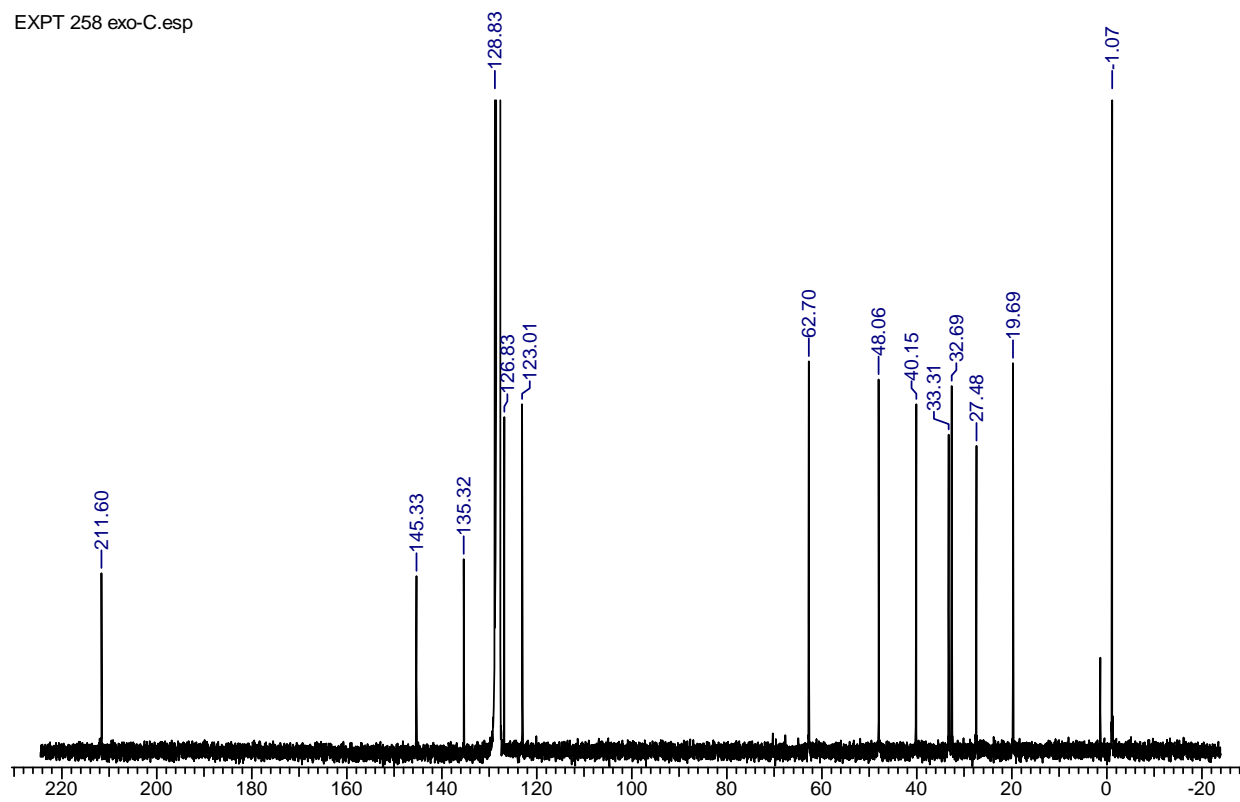

# Cycloadduct *endo*-16

EXPT 262 *endo*-H.esp

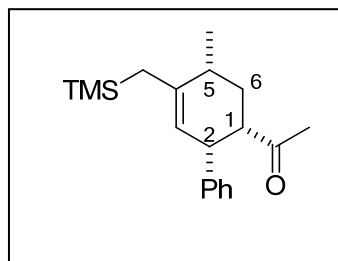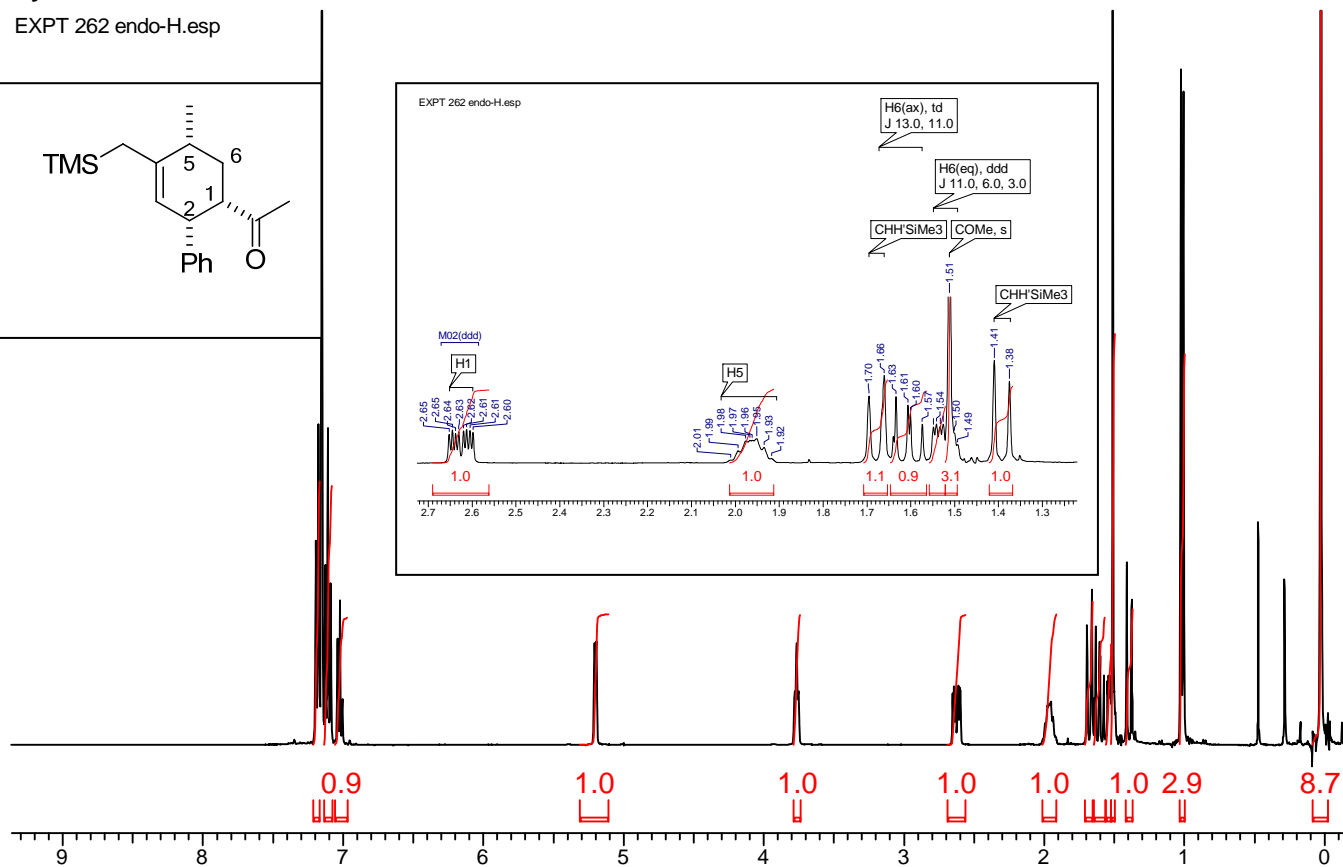

EXPT 262 *endo*-C.esp

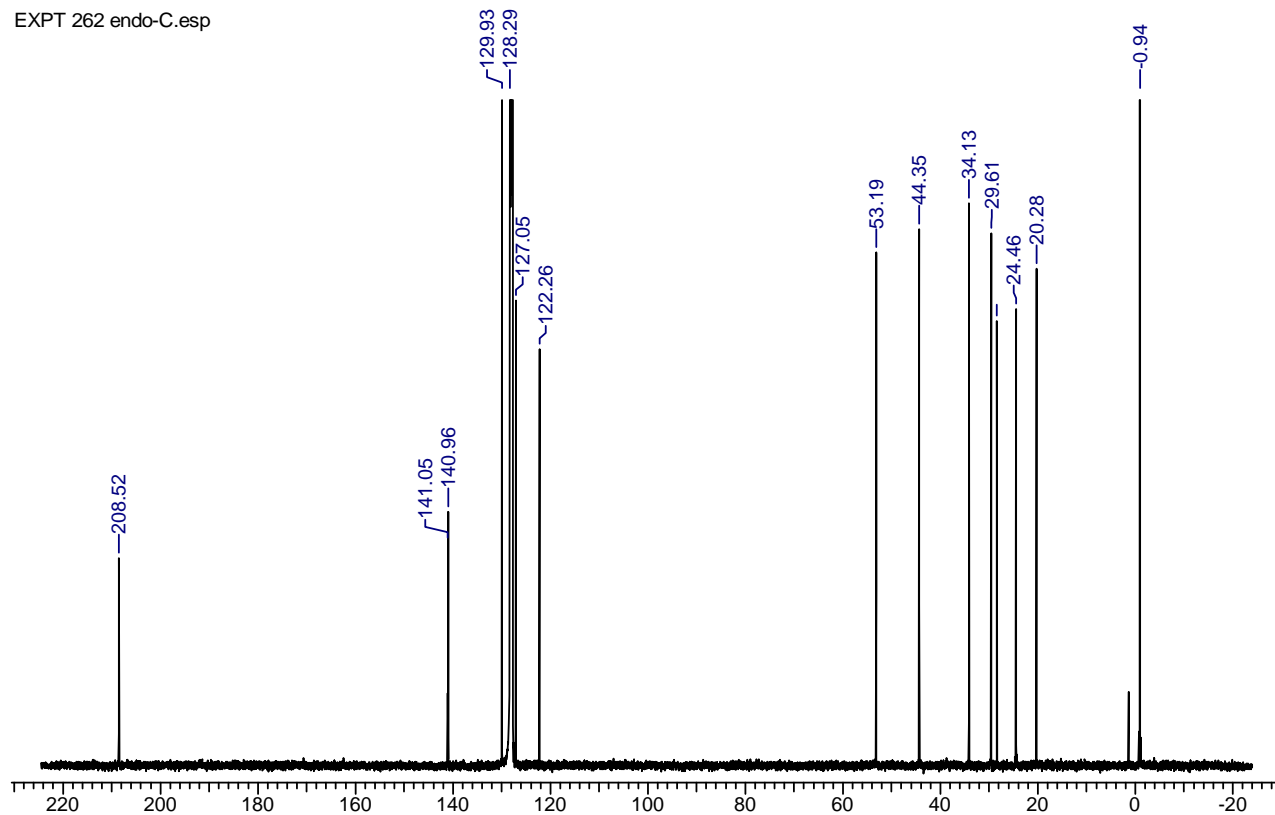

# Cycloadduct **exo-16**

EXPT 262 *exo-H.esp*

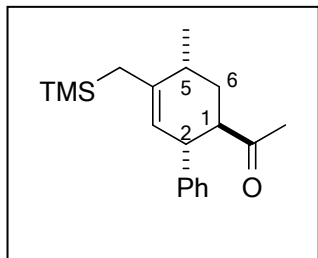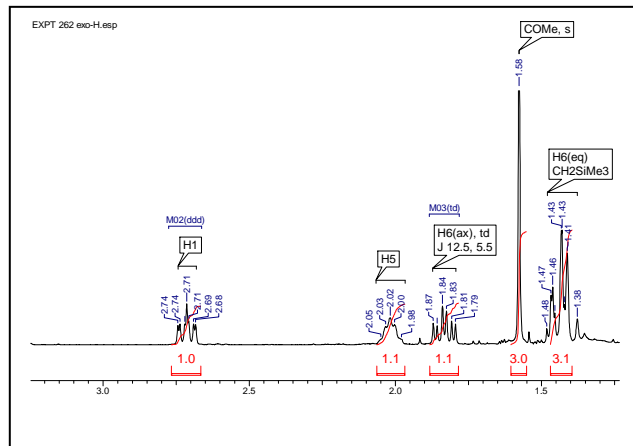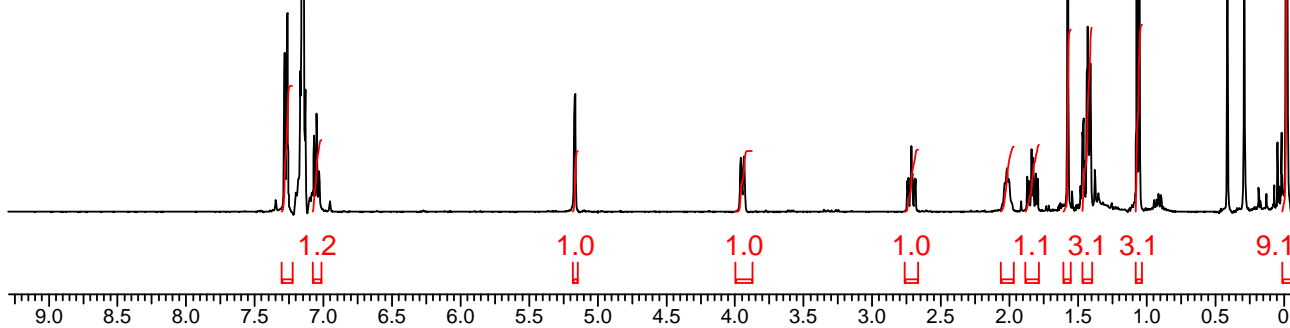

EXPT 262 *exo-C.esp*

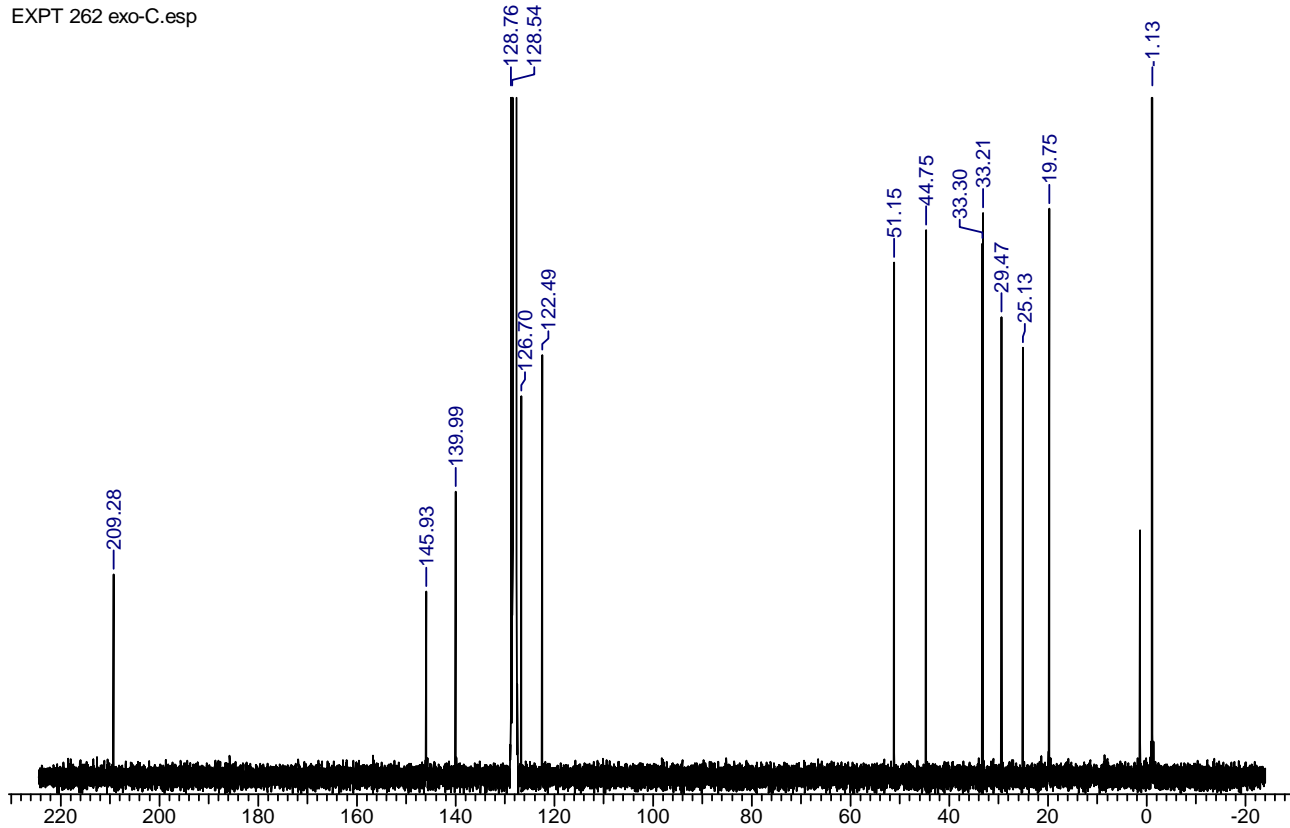

# Cycloadducts *exo*-17a/*exo*-17b

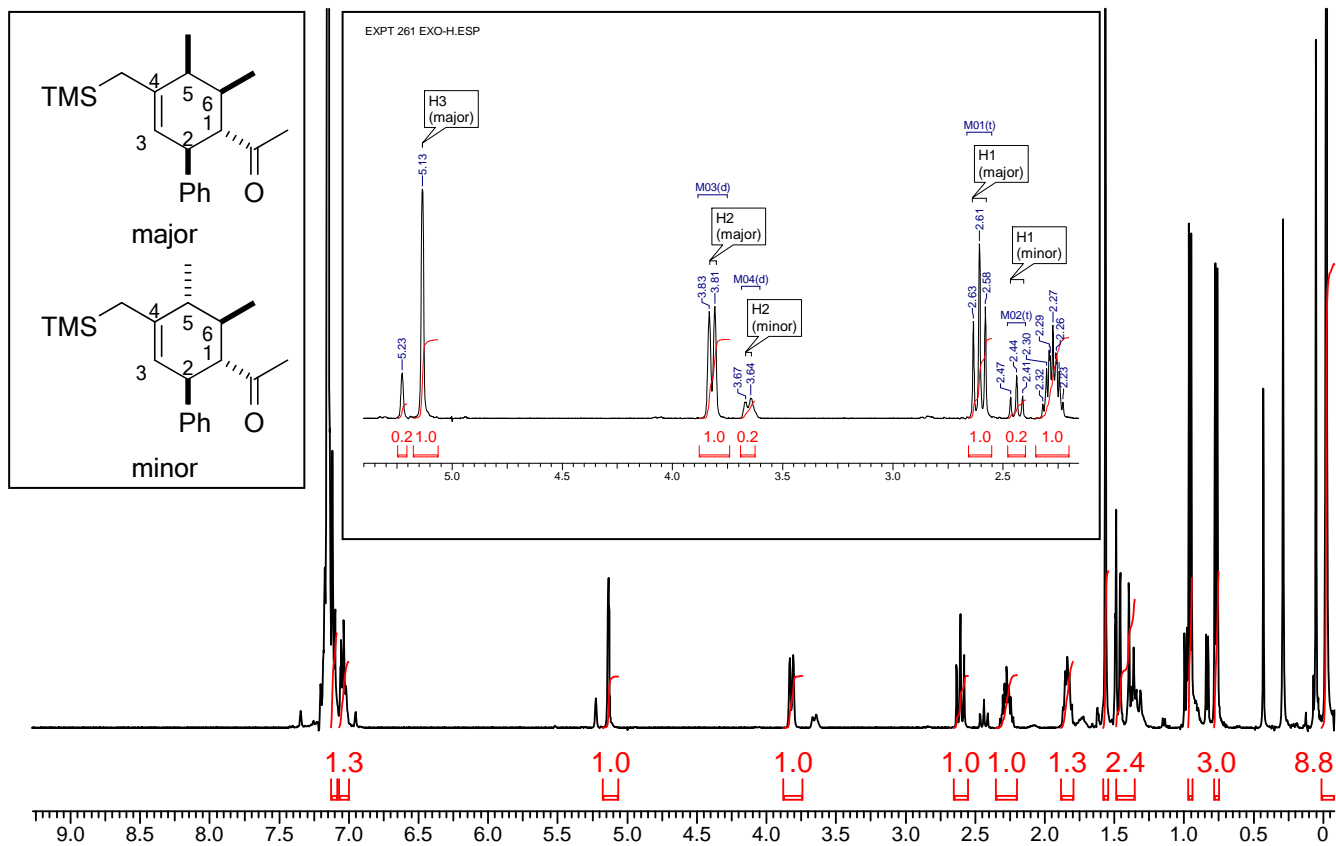

EXPT 261 EXO-C.ESP

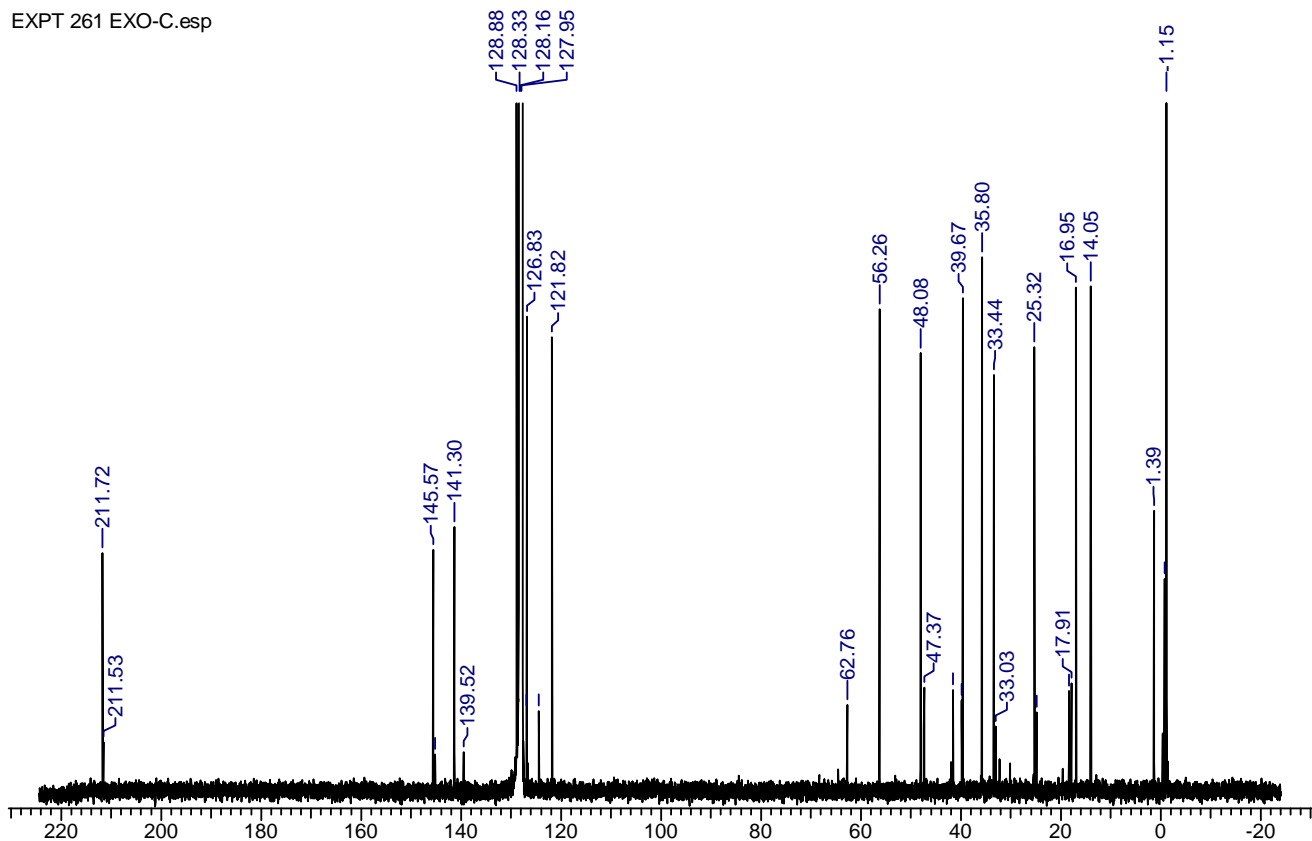

## References (Experimental)

- (1) Narayanan, B. A.; Bunnelle, W. H. *Tetrahedron Lett.* **1987**, *28*, 6261–6264.
- (2) Lam, Y.-h.; Bobbio, C.; Cooper, I. R.; Gouverneur, V. *Angew. Chem. Int. Ed.* **2007**, *46*, 5106–5110.
- (3) Yamamoto, Y.; Yamamoto, H. *Angew. Chem. Int. Ed.* **2005**, *44*, 7082–7085.
- (4) Kanemasa, S.; Kumegawa, M.; Wada, E.; Nomura, M. *Bull. Chem. Soc. Jpn.* **1991**, *64*, 2990–3004.
- (5) Nakashima, D.; Yamamoto, H. *J. Am. Chem. Soc.* **2006**, *128*, 9626–9627.
- (6) Evans, D. A.; Chapman, K. T.; Bisaha, J. *J. Am. Chem. Soc.* **1984**, *106*, 4261–4263.
- (7) Kanemasa, S.; Kanai, T. *J. Am. Chem. Soc.* **2000**, *122*, 10710–10711.
- (8) Thom, C.; Kocienski, P. *Synthesis* **1992**, 582–586.
- (9) Gößnitzer, E.; Wendelin, W. *Monatsh. Chem.* **2001**, *132*, 607–624.
- (10) Carter, M. J.; Fleming, I.; Percival, A. *J. Chem. Soc. Perkin Trans. 1* **1981**, 2415–2434.

## II. Computational Data

### A. Complete ref. 35

*Gaussian 03*, Revision C.02, M. J. Frisch, G. W. Trucks, H. B. Schlegel, G. E. Scuseria, M. A. Robb, J. R. Cheeseman, J. A. Montgomery, Jr., T. Vreven, K. N. Kudin, J. C. Burant, J. M. Millam, S. S. Iyengar, J. Tomasi, V. Barone, B. Mennucci, M. Cossi, G. Scalmani, N. Rega, G. A. Petersson, H. Nakatsuji, M. Hada, M. Ehara, K. Toyota, R. Fukuda, J. Hasegawa, M. Ishida, T. Nakajima, Y. Honda, O. Kitao, H. Nakai, M. Klene, X. Li, J. E. Knox, H. P. Hratchian, J. B. Cross, C. Adamo, J. Jaramillo, R. Gomperts, R. E. Stratmann, O. Yazyev, A. J. Austin, R. Cammi, C. Pomelli, J. W. Ochterski, P. Y. Ayala, K. Morokuma, G. A. Voth, P. Salvador, J. J. Dannenberg, V. G. Zakrzewski, S. Dapprich, A. D. Daniels, M. C. Strain, O. Farkas, D. K. Malick, A. D. Rabuck, K. Raghavachari, J. B. Foresman, J. V. Ortiz, Q. Cui, A. G. Baboul, S. Clifford, J. Cioslowski, B. B. Stefanov, G. Liu, A. Liashenko, P. Piskorz, I. Komaromi, R. L. Martin, D. J. Fox, T. Keith, M. A. Al-Laham, C. Y. Peng, A. Nanayakkara, M. Challacombe, P. M. W. Gill, B. Johnson, W. Chen, M. W. Wong, C. Gonzalez, and J. A. Pople, Gaussian, Inc., Wallingford CT, 2004.

*Gaussian 03*, Revision D.01, M. J. Frisch, G. W. Trucks, H. B. Schlegel, G. E. Scuseria, M. A. Robb, J. R. Cheeseman, J. A. Montgomery, Jr., T. Vreven, K. N. Kudin, J. C. Burant, J. M. Millam, S. S. Iyengar, J. Tomasi, V. Barone, B. Mennucci, M. Cossi, G. Scalmani, N. Rega, G. A. Petersson, H. Nakatsuji, M. Hada, M. Ehara, K. Toyota, R. Fukuda, J. Hasegawa, M. Ishida, T. Nakajima, Y. Honda, O. Kitao, H. Nakai, M. Klene, X. Li, J. E. Knox, H. P. Hratchian, J. B. Cross, V. Bakken, C. Adamo, J. Jaramillo, R. Gomperts, R. E. Stratmann, O. Yazyev, A. J. Austin, R. Cammi, C. Pomelli, J. W. Ochterski, P. Y. Ayala, K. Morokuma, G. A. Voth, P. Salvador, J. J. Dannenberg, V. G. Zakrzewski, S. Dapprich, A. D. Daniels, M. C. Strain, O. Farkas, D. K. Malick, A. D. Rabuck, K. Raghavachari, J. B. Foresman, J. V. Ortiz, Q. Cui, A. G. Baboul, S. Clifford, J. Cioslowski, B. B. Stefanov, G. Liu, A. Liashenko, P. Piskorz, I. Komaromi, R. L. Martin, D. J. Fox, T. Keith, M. A. Al-Laham, C. Y. Peng, A. Nanayakkara, M. Challacombe, P. M. W. Gill, B. Johnson, W. Chen, M. W. Wong, C. Gonzalez, and J. A. Pople, Gaussian, Inc., Wallingford CT, 2004.

## B. Optimized Structure and Energies of Reactants

### Diene **1d**

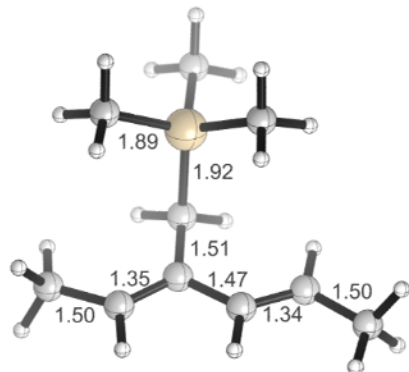

```

-----
Analyzing Gaussian Output File: l1_t_SM_080426.out
Using Gaussian 03: IA64L-G03RevD.01 13-Oct-2005
[#Processors=4 Memory=4gb CheckPoint=l1_t_SM_080426.chk]
-----
#p b3lyp/6-31g(d) geom=check freq=noraman opt=(maxstep=15)
#P Geom=AllCheck Guess=Read SCRF=Check GenChk RB3LYP/6-31G(d) Freq
-----
Pointgroup=C1 Stoichiometry=C10H20Si C1[X(C10H20Si)]
Charge = 0 Multiplicity = 1
-----
Standard basis: 6-31G(d) (6D, 7F) #Basis: 209
SCF Energy= -682.618112308
Predicted Change= -1.089985D-08
-----
Optimization completed on the basis of negligible forces. {Found 2 times}
Item Max Val. Criteria Pass? RMS Val. Criteria Pass?
Force 0.000003 || 0.000450 [ YES ] 0.000001 || 0.000300 [ YES ]
Displ 0.003241 || 0.001800 [ NO ] 0.000599 || 0.001200 [ YES ]
-----
Center Atomic Atomic Coordinates (Angstroms)
Number Number Type X Y Z
-----
1 6 0 -0.623093 2.379483 0.143788
2 1 0 -1.437282 2.844719 0.701087
3 6 0 -0.808021 1.100026 -0.257271
4 6 0 -2.094470 0.468132 0.073282
5 1 0 -2.768290 1.092307 0.663295
6 6 0 -2.530111 -0.752442 -0.279856
7 1 0 -1.893012 -1.405530 -0.874085
8 6 0 -3.874015 -1.312913 0.086007
9 14 0 1.420101 -0.773609 0.032941
10 6 0 2.547645 -1.701860 -1.179024

```

```

11 1 0 3.120539 -1.011901 -1.810760
12 1 0 3.268444 -2.333857 -0.645731
13 1 0 1.967895 -2.353577 -1.844282
14 6 0 0.501064 -2.028920 1.111240
15 1 0 1.210458 -2.596782 1.726545
16 1 0 -0.209723 -1.537304 1.784119
17 1 0 -0.062619 -2.750166 0.507974
18 6 0 2.474449 0.341129 1.144963
19 1 0 1.851245 0.921789 1.834718
20 1 0 3.169801 -0.256282 1.747387
21 1 0 3.070631 1.050192 0.558337
22 1 0 -4.460045 -0.601434 0.677835
23 1 0 -3.775936 -2.238834 0.670001
24 1 0 -4.457782 -1.570492 -0.808866
25 6 0 0.227587 0.301464 -1.017312
26 1 0 0.867788 0.970494 -1.605413
27 1 0 -0.262817 -0.350075 -1.751823
28 6 0 0.561739 3.270186 -0.087701
29 1 0 0.246254 4.226736 -0.526776
30 1 0 1.066085 3.515873 0.857868
31 1 0 1.310318 2.828942 -0.751301

```

```

-----
Statistical Thermodynamic Analysis for l1_t_SM_080426.out
Temperature= 298.150 Kelvin Pressure= 1.00000 Atm
-----
SCF Energy= -682.618112308
Zero-point correction (ZPE)= -682.34522 0.272886
Internal Energy (U)= -682.32875 0.289354
Enthalpy (H)= -682.32781 0.290298
Gibbs Free Energy (G)= -682.38882 0.229285
Entropy (S)= 0.00020464
-----
Frequencies -- 21.9970 67.1106 90.5103
Frequencies -- 97.6416 106.5213 139.4847

```

```

-----
Analyzing Gaussian Output File: MP2_l1_t_SM_080729.out
Using Gaussian 03: AM64L-G03RevC.02 12-Jun-2004
[#Processors=2 Memory=2gb CheckPoint=MP2_l1_t_SM_080729.chk]
-----
#p mp2/6-31+g(d) scf=tight
-----
Pointgroup=C1 Stoichiometry=C10H20Si C1[X(C10H20Si)]
Charge = 0 Multiplicity = 1
-----
Standard basis: 6-31+G(d) (6D, 7F) #Basis: 253
SCF Energy= -679.251562413
MP2 Energy= -680.65330196918 Correl. Energy= -1.401739556
-----
No optimization variables found.

```

# Diene 1e

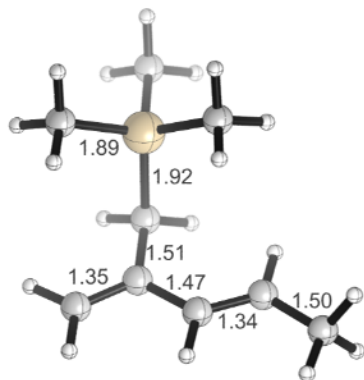

```
-----
Analyzing Gaussian Output File: 12_t_SM_080305.out
Using Gaussian 03: AM64L-G03RevC.02 12-Jun-2004
[#Processors=2 Memory=1800MB CheckPoint=12_t_SM_080305.chk]
-----
# opt freq=noraman b3lyp/6-31g(d) geom=connectivity
#N Geom=AllCheck Guess=Read SCRF=Check GenChk RB3LYP/6-31G(d) Freq
-----
Pointgroup=C1 Stoichiometry=C9H18Si C1[X(C9H18Si)]
Charge = 0 Multiplicity = 1
-----
Standard basis: 6-31G(d) (6D, 7F) #Basis: 190
SCF Energy= -643.301526081
Predicted Change= -2.287246D-07
-----
```

```
Optimization completed. {Found 1 times}
Item Max Val. Criteria Pass? RMS Val. Criteria Pass?
Force 0.000011 || 0.000450 [ YES ] 0.000004 || 0.000300 [ YES ]
Displ 0.016432 || 0.001800 [ NO ] 0.004528 || 0.001200 [ NO ]
-----
```

| Center Number | Atomic Number | Atomic Type | Coordinates (Angstroms) |           |           |
|---------------|---------------|-------------|-------------------------|-----------|-----------|
|               |               |             | X                       | Y         | Z         |
| 1             | 6             | 0           | -0.725370               | 2.609603  | 0.042820  |
| 2             | 1             | 0           | -1.501250               | 3.131274  | 0.597289  |
| 3             | 6             | 0           | -0.860532               | 1.315742  | -0.310659 |
| 4             | 6             | 0           | -2.101474               | 0.614651  | 0.046664  |
| 5             | 1             | 0           | -2.815497               | 1.213493  | 0.614635  |
| 6             | 6             | 0           | -2.445981               | -0.645338 | -0.264792 |
| 7             | 1             | 0           | -1.757929               | -1.267252 | -0.835490 |
| 8             | 6             | 0           | -3.746295               | -1.290100 | 0.116719  |
| 9             | 14            | 0           | 1.524179                | -0.333174 | 0.035005  |
| 10            | 6             | 0           | 2.831481                | -1.053698 | -1.135925 |
| 11            | 1             | 0           | 3.313865                | -0.267914 | -1.729987 |
| 12            | 1             | 0           | 3.618922                | -1.575679 | -0.578419 |
| 13            | 1             | 0           | 2.391706                | -1.774760 | -1.835885 |
| 14            | 6             | 0           | 0.742268                | -1.738479 | 1.036007  |
| 15            | 1             | 0           | 1.494433                | -2.223567 | 1.670758  |
| 16            | 1             | 0           | -0.061027               | -1.373421 | 1.685025  |

|    |   |   |           |           |           |
|----|---|---|-----------|-----------|-----------|
| 17 | 1 | 0 | 0.315770  | -2.510639 | 0.384351  |
| 18 | 6 | 0 | 2.336598  | 0.906334  | 1.212422  |
| 19 | 1 | 0 | 1.588917  | 1.390760  | 1.850342  |
| 20 | 1 | 0 | 3.067248  | 0.412887  | 1.864948  |
| 21 | 1 | 0 | 2.864664  | 1.696478  | 0.664542  |
| 22 | 1 | 0 | -4.384473 | -0.605312 | 0.685425  |
| 23 | 1 | 0 | -3.582352 | -2.188370 | 0.728097  |
| 24 | 1 | 0 | -4.305274 | -1.616423 | -0.771351 |
| 25 | 6 | 0 | 0.238791  | 0.587867  | -1.051839 |
| 26 | 1 | 0 | 0.817264  | 1.315082  | -1.637093 |
| 27 | 1 | 0 | -0.179815 | -0.117181 | -1.781494 |
| 28 | 1 | 0 | 0.159414  | 3.185485  | -0.214261 |

```
-----
Statistical Thermodynamic Analysis for 12_t_SM_080305.out
Temperature= 298.150 Kelvin Pressure= 1.00000 Atm
-----
SCF Energy= -643.301526081
Zero-point correction (ZPE)= -643.05720 0.244319
Internal Energy (U)= -643.04226 0.259264
Enthalpy (H)= -643.04131 0.260208
Gibbs Free Energy (G)= -643.09875 0.202774
Entropy (S)= 0.00019264
-----
Frequencies -- 26.4176 60.4555 102.5756
Frequencies -- 124.1166 140.8431 143.0017
-----
```

```
-----
Analyzing Gaussian Output File: MP2_12_t_SM_080729.out
Using Gaussian 03: AM64L-G03RevC.02 12-Jun-2004
[#Processors=2 Memory=2gB CheckPoint=MP2_12_t_SM_080729.chk]
-----
#p mp2/6-31+g(d) scf=(direct,tight)
-----
Pointgroup=C1 Stoichiometry=C9H18Si C1[X(C9H18Si)]
Charge = 0 Multiplicity = 1
-----
Standard basis: 6-31+G(d) (6D, 7F) #Basis: 230
SCF Energy= -640.216827348
MP2 Energy= -641.48272682987 Correl. Energy= -1.265899482
-----
No optimization variables found.
-----
```



# Diene 2c

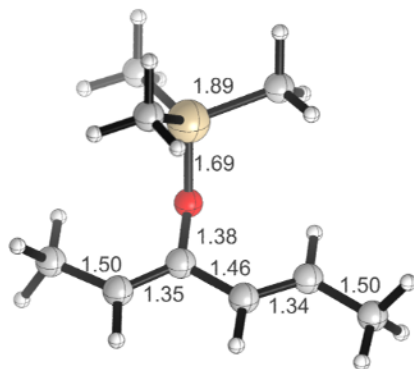

```
-----
Analyzing Gaussian Output File: methylmethylOTMS_s-trans.out
Using Gaussian 03: AM64L-G03RevC.02 12-Jun-2004
[#Processors=2 Memory=1800MB CheckPoint=methylmethylOTMS_s-trans.chk]
-----
# opt freq=noraman b3lyp/6-31g(d) geom=connectivity
#N Geom=AllCheck Guess=Read SCRF=Check GenChk RB3LYP/6-31G(d) Freq
-----
Pointgroup=C1 Stoichiometry=C9H18OSi Cl[X(C9H18OSi)]
Charge = 0 Multiplicity = 1
-----
Standard basis: 6-31G(d) (6D, 7F) #Basis: 205
SCF Energy= -718.563833146
Predicted Change= -1.535859D-09
-----
```

```
-----
Optimization completed. {Found 2 times}
Item Max Val. Criteria Pass? RMS Val. Criteria Pass?
Force 0.000002 || 0.000450 [ YES ] 0.000001 || 0.000300 [ YES ]
Displ 0.001219 || 0.001800 [ YES ] 0.000279 || 0.001200 [ YES ]
-----
```

| Center Number | Atomic Number | Atomic Type | Coordinates (Angstroms) |           |           |
|---------------|---------------|-------------|-------------------------|-----------|-----------|
|               |               |             | X                       | Y         | Z         |
| 1             | 6             | 0           | 1.110003                | 2.964661  | -0.179049 |
| 2             | 1             | 0           | 1.036235                | 3.886112  | -0.772204 |
| 3             | 1             | 0           | 1.632408                | 3.234835  | 0.750467  |
| 4             | 1             | 0           | 1.737677                | 2.259813  | -0.730473 |
| 5             | 6             | 0           | -0.248605               | 2.395482  | 0.093039  |
| 6             | 1             | 0           | -0.990870               | 3.069987  | 0.514870  |
| 7             | 6             | 0           | -0.653145               | 1.133709  | -0.157725 |
| 8             | 6             | 0           | -2.030850               | 0.704527  | 0.092984  |
| 9             | 1             | 0           | -2.660036               | 1.444605  | 0.587234  |
| 10            | 6             | 0           | -2.559851               | -0.477793 | -0.257232 |
| 11            | 1             | 0           | -1.930747               | -1.196706 | -0.777713 |
| 12            | 6             | 0           | -3.981915               | -0.884115 | -0.006024 |
| 13            | 14            | 0           | 1.259184                | -0.857767 | 0.037695  |
| 14            | 6             | 0           | 2.829765                | -0.833780 | -1.000995 |
| 15            | 1             | 0           | 3.309399                | 0.151655  | -0.986690 |
| 16            | 1             | 0           | 3.559214                | -1.566430 | -0.634000 |

|    |   |   |           |           |           |
|----|---|---|-----------|-----------|-----------|
| 17 | 1 | 0 | 2.608739  | -1.079693 | -2.046221 |
| 18 | 6 | 0 | 0.531462  | -2.598119 | 0.034056  |
| 19 | 1 | 0 | 1.255200  | -3.321680 | 0.430619  |
| 20 | 1 | 0 | -0.372827 | -2.659755 | 0.649571  |
| 21 | 1 | 0 | 0.268089  | -2.917729 | -0.981300 |
| 22 | 6 | 0 | 1.587582  | -0.298711 | 1.807887  |
| 23 | 1 | 0 | 0.662821  | -0.265254 | 2.395143  |
| 24 | 1 | 0 | 2.272391  | -0.996687 | 2.305618  |
| 25 | 1 | 0 | 2.040759  | 0.697900  | 1.845077  |
| 26 | 1 | 0 | -4.542131 | -0.100690 | 0.515845  |
| 27 | 1 | 0 | -4.035709 | -1.799576 | 0.599747  |
| 28 | 1 | 0 | -4.504639 | -1.105059 | -0.947118 |
| 29 | 8 | 0 | 0.189847  | 0.204740  | -0.725979 |

```
-----
Statistical Thermodynamic Analysis for methylmethylOTMS_s-trans.out
Temperature= 298.150 Kelvin Pressure= 1.00000 Atm
-----
SCF Energy= -718.563833146
Zero-point correction (ZPE)= -718.31491 0.248917
Internal Energy (U)= -718.29858 0.265251
Enthalpy (H)= -718.29763 0.266195
Gibbs Free Energy (G)= -718.35908 0.204746
Entropy (S)= 0.0002061
-----
Frequencies -- 11.9490 53.0701 93.9444
Frequencies -- 100.9179 127.2964 134.9863
-----
```

```
-----
Analyzing Gaussian Output File: SP_MP2_1_t_SM_080430.out
Using Gaussian 03: IA64L-G03RevD.01 13-Oct-2005
[#Processors=4 Memory=4gb CheckPoint=SP_MP2_1_t_SM_080430.chk]
-----
# mp2/6-31+g(d) scf=(direct,tight) geom=check guess=read
-----
Pointgroup=C1 Stoichiometry=C9H18OSi Cl[X(C9H18OSi)]
Charge = 0 Multiplicity = 1
-----
Standard basis: 6-31+G(d) (6D, 7F) #Basis: 249
SCF Energy= -715.122649994
MP2 Energy= -716.56719997436 Correl. Energy= -1.444549981
-----
No optimization variables found.
-----
```

## Diene 2e

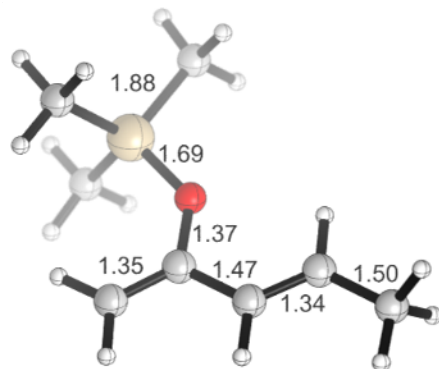

```
-----
Analyzing Gaussian Output File: 2_s-trans_SMopt_050208.out
Using Gaussian 03: AM64L-G03RevC.02 12-Jun-2004
[#Processors=2 Memory=1800MB CheckPoint=2_s-trans_SMopt_050208.chk]
-----
# opt freq b3lyp/6-31g(d) geom=connectivity
#N Geom=AllCheck Guess=Read SCRF=Check GenChk RB3LYP/6-31G(d) Freq

Pointgroup=C1 Stoichiometry=C8H16OSi C1[X(C8H16OSi)]
Charge = 0 Multiplicity = 1
-----
Standard basis: 6-31G(d) (6D, 7F) #Basis: 186
SCF Energy= -679.248096564
Predicted Change= -1.316370D-08
-----
```

```
-----
Optimization completed. {Found 1 times}
Item Max Val. Criteria Pass? RMS Val. Criteria Pass?
Force 0.000013 || 0.000450 [ YES ] 0.000003 || 0.000300 [ YES ]
Displ 0.003187 || 0.001800 [ NO ] 0.000699 || 0.001200 [ YES ]
-----
```

| Center Number | Atomic Number | Atomic Type | Coordinates (Angstroms) |           |           |
|---------------|---------------|-------------|-------------------------|-----------|-----------|
|               |               |             | X                       | Y         | Z         |
| 1             | 6             | 0           | -0.420268               | 2.242054  | -0.000133 |
| 2             | 1             | 0           | -1.134704               | 3.057107  | -0.000109 |
| 3             | 6             | 0           | -0.858204               | 0.968448  | -0.000196 |
| 4             | 6             | 0           | -2.289036               | 0.647478  | -0.000193 |
| 5             | 1             | 0           | -2.955023               | 1.509075  | -0.000293 |
| 6             | 6             | 0           | -2.800458               | -0.591413 | -0.000022 |
| 7             | 1             | 0           | -2.112622               | -1.434603 | 0.000163  |
| 8             | 6             | 0           | -4.265674               | -0.909548 | 0.000070  |
| 9             | 14            | 0           | 1.636041                | -0.302567 | 0.000082  |
| 10            | 6             | 0           | 1.883877                | -2.166041 | -0.000666 |
| 11            | 1             | 0           | 1.428656                | -2.624767 | -0.885770 |
| 12            | 1             | 0           | 2.950130                | -2.423508 | -0.001199 |
| 13            | 1             | 0           | 1.429371                | -2.625448 | 0.884456  |
| 14            | 6             | 0           | 2.374572                | 0.459765  | 1.559146  |
| 15            | 1             | 0           | 3.459967                | 0.301315  | 1.588805  |
| 16            | 1             | 0           | 2.193292                | 1.537618  | 1.625578  |

|    |   |   |           |           |           |
|----|---|---|-----------|-----------|-----------|
| 17 | 1 | 0 | 1.947003  | -0.002678 | 2.456440  |
| 18 | 6 | 0 | 2.375590  | 0.460680  | -1.558057 |
| 19 | 1 | 0 | 2.195441  | 1.538748  | -1.623774 |
| 20 | 1 | 0 | 3.460832  | 0.301127  | -1.587376 |
| 21 | 1 | 0 | 1.948005  | -0.000704 | -2.455904 |
| 22 | 1 | 0 | -4.879420 | -0.002282 | -0.000574 |
| 23 | 1 | 0 | -4.542254 | -1.506677 | 0.880165  |
| 24 | 1 | 0 | -4.542089 | -1.507854 | -0.879266 |
| 25 | 8 | 0 | -0.047967 | -0.132030 | -0.000259 |
| 26 | 1 | 0 | 0.630180  | 2.507185  | -0.000114 |

```
-----
Statistical Thermodynamic Analysis for 2_s-trans_SMopt_050208.out
Temperature= 298.150 Kelvin Pressure= 1.00000 Atm
-----
SCF Energy= -679.248096564
Zero-point correction (ZPE)= -679.02748 0.220608
Internal Energy (U)= -679.01267 0.235423
Enthalpy (H)= -679.01172 0.236367
Gibbs Free Energy (G)= -679.06958 0.178513
Entropy (S)= 0.00019404
-----
Frequencies -- 19.2573 65.9063 81.7709
Frequencies -- 109.9346 122.7910 134.6027
-----
```

```
-----
Analyzing Gaussian Output File: SP_MP2_2_s-trans_SM_080507.out
Using Gaussian 03: IA64L-G03RevD.01 13-Oct-2005
[#Processors=4 Memory=3gb CheckPoint=SP_MP2_2_s-trans_SM_080507.chk]
-----
#p mp2/6-31+g(d) geom=check guess=read scf=tight
-----
Pointgroup=C1 Stoichiometry=C8H16OSi C1[X(C8H16OSi)]
Charge = 0 Multiplicity = 1
-----
Standard basis: 6-31+G(d) (6D, 7F) #Basis: 226
SCF Energy= -676.088467501
MP2 Energy= -677.39563741851 Correl. Energy= -1.307169918
-----
No optimization variables found.
-----
```

# Diene 2f

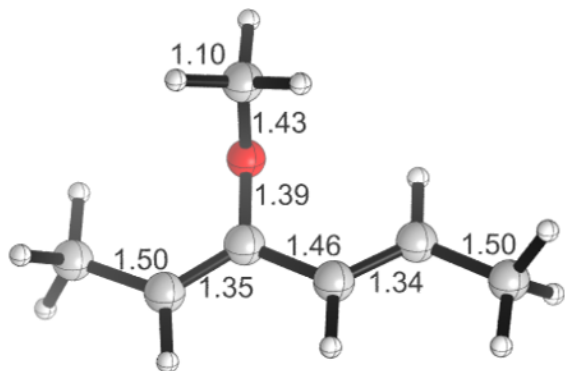

```
-----
Analyzing Gaussian Output File: 3_s-trans_SMopt_050208.out
Using Gaussian 03: AM64L-G03RevC.02 12-Jun-2004
[#Processors=2 Memory=1800MB CheckPoint=3_s-trans_SMopt_050208.chk]
-----
# opt freq b3lyp/6-31g(d) geom=connectivity
#N Geom=AllCheck Guess=Read SCRF=Check GenChk RB3LYP/6-31G(d) Freq
-----
Pointgroup=C1 Stoichiometry=C7H12O C1[X(C7H12O)]
Charge = 0 Multiplicity = 1
-----
Standard basis: 6-31G(d) (6D, 7F) #Basis: 144
SCF Energy= -349.149642609
Predicted Change= -1.317494D-08
-----
```

```
Optimization completed. {Found 2 times}
Item Max Val. Criteria Pass? RMS Val. Criteria Pass?
Force 0.000023 || 0.000450 [ YES ] 0.000005 || 0.000300 [ YES ]
Displ 0.001368 || 0.001800 [ YES ] 0.000360 || 0.001200 [ YES ]
-----
```

| Center Number | Atomic Number | Atomic Type | Coordinates (Angstroms) |           |           |
|---------------|---------------|-------------|-------------------------|-----------|-----------|
|               |               |             | X                       | Y         | Z         |
| 1             | 6             | 0           | -1.505790               | -1.132814 | 0.160926  |
| 2             | 1             | 0           | -1.277357               | -2.132821 | 0.525949  |
| 3             | 6             | 0           | -0.464401               | -0.307969 | -0.056462 |
| 4             | 6             | 0           | 0.927876                | -0.699125 | 0.172174  |
| 5             | 1             | 0           | 1.068986                | -1.660843 | 0.665751  |
| 6             | 6             | 0           | 2.001373                | 0.015083  | -0.200016 |
| 7             | 1             | 0           | 1.841217                | 0.960399  | -0.716338 |
| 8             | 6             | 0           | 3.424753                | -0.402165 | 0.020884  |
| 9             | 1             | 0           | 3.489396                | -1.369248 | 0.531300  |
| 10            | 1             | 0           | 3.966994                | -0.483804 | -0.931362 |
| 11            | 1             | 0           | 3.969596                | 0.336991  | 0.624803  |
| 12            | 6             | 0           | -2.946334               | -0.805492 | -0.087809 |
| 13            | 1             | 0           | -3.397806               | -1.526039 | -0.783483 |
| 14            | 1             | 0           | -3.535803               | -0.856212 | 0.838538  |
| 15            | 1             | 0           | -3.055308               | 0.193823  | -0.515931 |
| 16            | 8             | 0           | -0.676139               | 0.962046  | -0.578435 |

|    |   |   |           |          |           |
|----|---|---|-----------|----------|-----------|
| 17 | 6 | 0 | -0.695411 | 1.999182 | 0.400641  |
| 18 | 1 | 0 | -0.806487 | 2.939469 | -0.145506 |
| 19 | 1 | 0 | -1.541829 | 1.877937 | 1.090079  |
| 20 | 1 | 0 | 0.235127  | 2.023773 | 0.981655  |

```
-----
Statistical Thermodynamic Analysis for 3_s-trans_SMopt_050208.out
Temperature= 298.150 Kelvin Pressure= 1.00000 Atm
-----
SCF Energy= -349.149642609
Zero-point correction (ZPE)= -348.97453 0.175110
Internal Energy (U)= -348.96442 0.185219
Enthalpy (H)= -348.96348 0.186163
Gibbs Free Energy (G)= -349.00955 0.140089
Entropy (S)= 0.00015453
-----
Frequencies -- 75.6347 107.7878 136.6928
-----
```

```
-----
Analyzing Gaussian Output File: SP_MP2_3_t_SM_080502.out
Using Gaussian 03: IA64L-G03RevD.01 13-Oct-2005
[#Processors=2 Memory=1800MB CheckPoint=SP_MP2_3_t_SM_080502.chk]
-----
#p mp2/6-31+g(d) scf=tight
-----
Pointgroup=C1 Stoichiometry=C7H12O C1[X(C7H12O)]
Charge = 0 Multiplicity = 1
-----
Standard basis: 6-31+G(d) (6D, 7F) #Basis: 176
SCF Energy= -346.880910491
MP2 Energy= -347.97091763217 Correl. Energy= -1.090007141
-----
No optimization variables found.
-----
```

## Diene 18

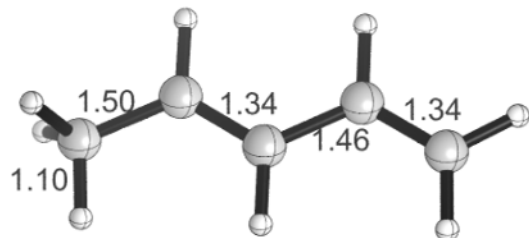

```

-----
Analyzing Gaussian Output File: 8_t_SM_080428.out
Using Gaussian 03: IA64L-G03RevD.01 13-Oct-2005
[#Processors=4 Memory=4gB CheckPoint=8_t_SM_080428.chk]
-----
#p opt=calcf freq=noraman b3lyp/6-31g(d)
#P Geom=AllCheck Guess=Read SCRF=Check GenChk RB3LYP/6-31G(d) Freq
-----
Pointgroup=C1 Stoichiometry=C5H8 C1[X(C5H8)]
Charge = 0 Multiplicity = 1
-----
Standard basis: 6-31G(d) (6D, 7F) #Basis: 91
SCF Energy= -195.312252467
Predicted Change= -3.384823D-08
-----
Optimization completed. {Found 2 times}
Item Max Val. Criteria Pass? RMS Val. Criteria Pass?
Force 0.000125 || 0.000450 [ YES ] 0.000020 || 0.000300 [ YES ]
Displ 0.000580 || 0.001800 [ YES ] 0.000179 || 0.001200 [ YES ]
-----
Center Atomic Atomic Coordinates (Angstroms)
Number Number Type X Y Z
-----
1 6 0 -1.114486 0.419354 -0.000095
2 1 0 -1.092781 1.510683 -0.000069
3 6 0 0.053058 -0.244841 -0.000093
4 1 0 0.044956 -1.336206 -0.000207
5 6 0 1.360621 0.395569 0.000009
6 6 0 2.530449 -0.260230 0.000046
7 1 0 2.574139 -1.347274 -0.000029
8 1 0 3.480692 0.265069 0.000155
9 1 0 1.362202 1.486338 0.000082
10 6 0 -2.471971 -0.217134 0.000050
11 1 0 -3.055442 0.087552 -0.879883
12 1 0 -2.404640 -1.310280 0.000310
13 1 0 -3.055150 0.087807 0.880142
-----
Statistical Thermodynamic Analysis for 8_t_SM_080428.out
Temperature= 298.150 Kelvin Pressure= 1.00000 Atm
-----
SCF Energy= -195.312252467
Zero-point correction (ZPE)= -195.19843 0.113819
Internal Energy (U)= -195.19234 0.119911
Enthalpy (H)= -195.19139 0.120856
Gibbs Free Energy (G)= -195.22722 0.085029
Entropy (S)= 0.00012016

```

```

-----
Frequencies -- 140.2539 196.7805 215.0693
-----
Analyzing Gaussian Output File: MP2_8_t_SM_080428.out
Using Gaussian 03: IA64L-G03RevD.01 13-Oct-2005
[#Processors=4 Memory=4gB CheckPoint=MP2_8_t_SM_080428.chk]
-----
#p mp2/6-31+g(d) scf=tight
-----
Pointgroup=C1 Stoichiometry=C5H8 C1[X(C5H8)]
Charge = 0 Multiplicity = 1
-----
Standard basis: 6-31+G(d) (6D, 7F) #Basis: 111
SCF Energy= -193.964081686
MP2 Energy= -194.60582583013 Correl. Energy= -0.6417441443
-----
No optimization variables found.

```

# Diene 19

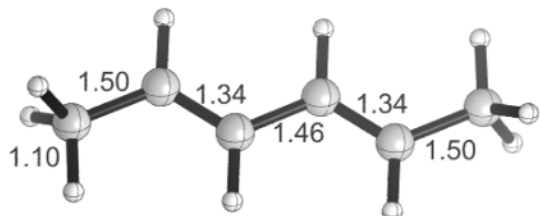

```

-----
Analyzing Gaussian Output File: 6_s-trans_SMOpt_050208.out
Using Gaussian 03: AM64L-G03RevC.02 12-Jun-2004
[#Processors=2 Memory=1800MB CheckPoint=6_s-trans_SMOpt_050208.chk]
-----
# opt freq b3lyp/6-31g(d) geom=connectivity
#N Geom=AllCheck Guess=Read SCRF=Check GenChk RB3LYP/6-31G(d) Freq
-----
Pointgroup=C1 Stoichiometry=C6H10 C1[X(C6H10)]
Charge = 0 Multiplicity = 1
-----
Standard basis: 6-31G(d) (6D, 7F) #Basis: 110
SCF Energy= -234.632032487
Predicted Change= -2.534289D-07
-----
Optimization completed. {Found 2 times}
Item Max Val. Criteria Pass? RMS Val. Criteria Pass?
Force 0.000130 || 0.000450 [ YES ] 0.000041 || 0.000300 [ YES ]
Displ 0.001664 || 0.001800 [ YES ] 0.000664 || 0.001200 [ YES ]
-----
Center Atomic Atomic Coordinates (Angstroms)
Number Number Type X Y Z
-----
1 6 0 -1.804907 0.433447 0.000022
2 1 0 -1.733425 1.522619 0.000028
3 6 0 -0.669443 -0.284641 0.000005
4 1 0 -0.733032 -1.374520 -0.000007
5 6 0 0.669244 0.285470 -0.000014
6 6 0 1.804698 -0.432876 -0.000032
7 1 0 1.732582 -1.522142 -0.000042
8 6 0 3.190543 0.139668 -0.000011
9 1 0 3.173848 1.234943 -0.000057
10 1 0 3.760092 -0.190531 0.880041
11 1 0 3.760149 -0.190609 -0.879994
12 6 0 -3.190362 -0.140618 0.000022
13 1 0 -3.172208 -1.235823 -0.000018
14 1 0 -3.760303 0.188914 0.880070
15 1 0 -3.760341 0.188983 -0.879975
16 1 0 0.733998 1.375466 0.000004
-----
Statistical Thermodynamic Analysis for 6_s-trans_SMOpt_050208.out
Temperature= 298.150 Kelvin Pressure= 1.00000 Atm
-----
SCF Energy= -234.632032487
Zero-point correction (ZPE)= -234.48994 0.142084
Internal Energy (U)= -234.48234 0.149686
Enthalpy (H)= -234.48140 0.150631

```

```

Gibbs Free Energy (G)= -234.52104 0.110986
Entropy (S)= 0.00013297
-----
Frequencies -- 105.6851 138.5189 168.7471
-----
Analyzing Gaussian Output File: MP2_6_t_SM_080430.out
Using Gaussian 03: IA64L-G03RevD.01 13-Oct-2005
[#Processors=2 Memory=2GB CheckPoint=MP2_6_t_SM_080430.chk]
-----
#p mp2/6-31+g(d) scf=tight
-----
Pointgroup=C1 Stoichiometry=C6H10 C1[X(C6H10)]
Charge = 0 Multiplicity = 1
-----
Standard basis: 6-31+G(d) (6D, 7F) #Basis: 134
SCF Energy= -233.002624344
MP2 Energy= -233.7772529114 Correl. Energy= -0.7751009474
-----
No optimization variables found.

```

# Diene 20

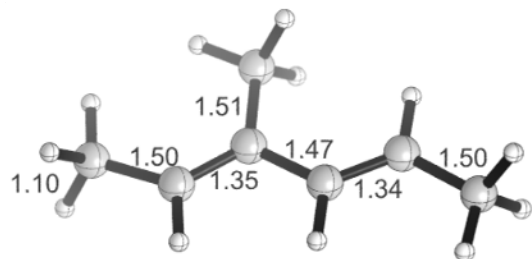

-----  
 Analyzing Gaussian Output File: 9\_t\_SM+PCM\_080731.out  
 Using Gaussian 03: AM64L-G03RevC.02 12-Jun-2004  
 [#Processors=2 Memory=2gB CheckPoint=9\_t\_SM+PCM\_080731.chk]  
 =====

#p opt freq=noraman b3lyp/6-31g(d)  
 #P Geom=AllCheck Guess=Read SCRF=Check GenChk RB3LYP/6-31G(d) Freq  
 -----

Pointgroup=C1 Stoichiometry=C7H12 Cl[X(C7H12)]  
 Charge = 0 Multiplicity = 1  
 -----

Standard basis: 6-31G(d) (6D, 7F) #Basis: 129  
 SCF Energy= -273.946855938  
 Predicted Change= -6.992295D-08  
 =====

Optimization completed. {Found 1 times}  

| Item  | Max Val. | Criteria | Pass?   | RMS Val. | Criteria | Pass?   |
|-------|----------|----------|---------|----------|----------|---------|
| Force | 0.000026 | 0.000450 | [ YES ] | 0.000007 | 0.000300 | [ YES ] |
| Displ | 0.005242 | 0.001800 | [ NO ]  | 0.001126 | 0.001200 | [ YES ] |

  
 -----

| Center Number | Atomic Number | Atomic Type | Coordinates (Angstroms) |           |           |
|---------------|---------------|-------------|-------------------------|-----------|-----------|
|               |               |             | X                       | Y         | Z         |
| 1             | 6             | 0           | 1.938654                | 0.228322  | 0.000511  |
| 2             | 1             | 0           | 1.912739                | 1.317481  | 0.001786  |
| 3             | 6             | 0           | 0.787371                | -0.463493 | -0.000834 |
| 4             | 1             | 0           | 0.844629                | -1.553563 | -0.002131 |
| 5             | 6             | 0           | -0.572231               | 0.090797  | -0.000513 |
| 6             | 6             | 0           | -1.615738               | -0.766379 | 0.000018  |
| 7             | 1             | 0           | -1.376290               | -1.831070 | -0.000101 |
| 8             | 6             | 0           | -3.085233               | -0.464991 | 0.000551  |
| 9             | 1             | 0           | -3.310526               | 0.604445  | 0.003037  |
| 10            | 1             | 0           | -3.573424               | -0.906484 | -0.879738 |
| 11            | 1             | 0           | -3.573428               | -0.910410 | 0.878830  |
| 12            | 6             | 0           | 3.304784                | -0.393575 | 0.000317  |
| 13            | 1             | 0           | 3.249213                | -1.487609 | -0.000919 |
| 14            | 1             | 0           | 3.886322                | -0.083251 | -0.879181 |
| 15            | 1             | 0           | 3.885665                | -0.085201 | 0.880931  |
| 16            | 6             | 0           | -0.713578               | 1.594579  | -0.000330 |
| 17            | 1             | 0           | -0.227465               | 2.032101  | 0.881095  |
| 18            | 1             | 0           | -0.226010               | 2.032345  | -0.880743 |
| 19            | 1             | 0           | -1.755596               | 1.919653  | -0.001185 |

  
 -----

Statistical Thermodynamic Analysis for 9\_t\_SM+PCM\_080731.out  
 Temperature= 298.150 Kelvin Pressure= 1.00000 Atm  
 =====

SCF Energy= -273.946855938  
 Zero-point correction (ZPE)= -273.77623 0.170622  
 Internal Energy (U)= -273.76723 0.179622  
 Enthalpy (H)= -273.76629 0.180566  
 Gibbs Free Energy (G)= -273.80938 0.137470  
 Entropy (S)= 0.00014455  
 -----  
 Frequencies -- 99.7759 117.1021 163.0502  
 -----

Analyzing Gaussian Output File: 9\_t\_MP2\_080805.out  
 Using Gaussian 03: AM64L-G03RevC.02 12-Jun-2004  
 [#Processors=2 Memory=2gB CheckPoint=9\_t\_MP2\_080805.chk]  
 =====

#p mp2/6-31+g(d) scf=(direct,tight) geom=check guess=read  
 -----  
 Pointgroup=C1 Stoichiometry=C7H12 Cl[X(C7H12)]  
 Charge = 0 Multiplicity = 1  
 -----

Standard basis: 6-31+G(d) (6D, 7F) #Basis: 157  
 SCF Energy= -272.035585191  
 MP2 Energy= -272.94687811226 Correl. Energy= -0.9112929209  
 =====

No optimization variables found.

# Dienophile A<sub>2</sub>

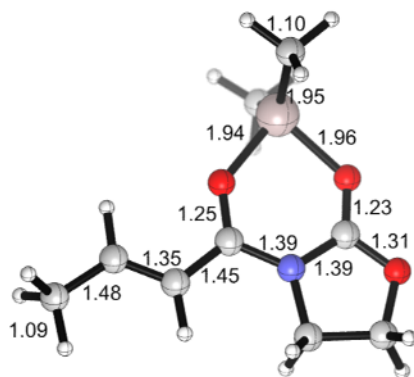

```

=====
Analyzing Gaussian Output File: Medienophileachiral_s-cis_AlMe2.out
Using Gaussian 03: AM64L-G03RevC.02 12-Jun-2004
[#Processors=2 Memory=1800Mb CheckPoint=Medienophileachiral_s-cis_AlMe2.chk]
=====
# opt freq=noraman rb3lyp/6-31g(d) geom=connectivity
#N Geom=AllCheck Guess=Read SCRF=Check GenChk RB3LYP/6-31G(d) Freq
-----
Pointgroup=C1 Stoichiometry=C9H15AlNO3(1+) C1[X(C9H15AlNO3)]
Charge = 1 Multiplicity = 1
-----
Standard basis: 6-31G(d) (6D, 7F) #Basis: 244
SCF Energy= -874.734526729
Predicted Change= -2.536120D-08
=====

```

```

Optimization completed on the basis of negligible forces. (Found 2 times)
Item Max Val. Criteria Pass? RMS Val. Criteria Pass?
Force 0.000003 || 0.000450 [ YES ] 0.000001 || 0.000300 [ YES ]
Displ 0.008272 || 0.001800 [ NO ] 0.001451 || 0.001200 [ NO ]
-----

```

| Center Number | Atomic Number | Atomic Type | Coordinates (Angstroms) |           |           |
|---------------|---------------|-------------|-------------------------|-----------|-----------|
|               |               |             | X                       | Y         | Z         |
| 1             | 6             | 0           | 5.084653                | -1.674563 | -0.121645 |
| 2             | 1             | 0           | 5.405680                | -2.250118 | 0.757460  |
| 3             | 1             | 0           | 5.332666                | -2.298191 | -0.991579 |
| 4             | 1             | 0           | 5.658583                | -0.746096 | -0.171213 |
| 5             | 6             | 0           | 3.618443                | -1.449579 | -0.066948 |
| 6             | 1             | 0           | 2.983737                | -2.333186 | -0.016066 |
| 7             | 6             | 0           | 3.017477                | -0.236582 | -0.075888 |
| 8             | 1             | 0           | 3.610829                | 0.669154  | -0.126565 |
| 9             | 6             | 0           | 1.575691                | -0.130396 | -0.024920 |
| 10            | 8             | 0           | 0.830099                | -1.137516 | 0.025270  |
| 11            | 6             | 0           | 1.743951                | 2.425353  | -0.123150 |
| 12            | 6             | 0           | 0.595257                | 3.447307  | 0.015072  |
| 13            | 1             | 0           | 2.255944                | 2.499599  | -1.086171 |
| 14            | 1             | 0           | 2.470094                | 2.515645  | 0.686697  |
| 15            | 1             | 0           | 0.568089                | 4.185429  | -0.785548 |
| 16            | 1             | 0           | 0.575827                | 3.945597  | 0.985461  |

|    |    |   |           |           |           |
|----|----|---|-----------|-----------|-----------|
| 17 | 7  | 0 | 1.012463  | 1.143498  | -0.032015 |
| 18 | 6  | 0 | -0.359426 | 1.374194  | -0.052702 |
| 19 | 8  | 0 | -1.251100 | 0.523347  | -0.049152 |
| 20 | 8  | 0 | -0.625013 | 2.657649  | -0.084056 |
| 21 | 13 | 0 | -1.084571 | -1.423035 | 0.043636  |
| 22 | 6  | 0 | -1.591556 | -2.137689 | -1.696188 |
| 23 | 1  | 0 | -2.676202 | -2.067170 | -1.848680 |
| 24 | 1  | 0 | -1.115206 | -1.618907 | -2.537481 |
| 25 | 1  | 0 | -1.332840 | -3.200631 | -1.783755 |
| 26 | 6  | 0 | -1.586164 | -1.963624 | 1.846959  |
| 27 | 1  | 0 | -1.114597 | -1.360954 | 2.633296  |
| 28 | 1  | 0 | -2.671442 | -1.887502 | 1.991955  |
| 29 | 1  | 0 | -1.318703 | -3.010539 | 2.039375  |

```

-----
Statistical Thermodynamic Analysis for Medienophileachiral_s-cis_AlMe2.out
Temperature= 298.150 Kelvin Pressure= 1.00000 Atm
-----
SCF Energy= -874.734526729
Zero-point correction (ZPE)= -874.50026 0.234257
Internal Energy (U)= -874.48316 0.251366
Enthalpy (H)= -874.48221 0.252310
Gibbs Free Energy (G)= -874.54652 0.187998
Entropy (S)= 0.0002157
-----
Frequencies -- 34.7071 43.4105 62.7412
Frequencies -- 63.7295 71.3681 94.6161
-----

```

```

Analyzing Gaussian Output File: MP2_a2_SM_080427.out
Using Gaussian 03: IA64L-G03RevD.01 13-Oct-2005
[#Processors=4 Memory=4gb CheckPoint=MP2_a2_SM_080427.chk]
-----

```

```
#p mp2/6-31+g(d) scf=tight
```

```
Pointgroup=C1 Stoichiometry=C9H15AlNO3(1+) C1[X(C9H15AlNO3)]
Charge = 1 Multiplicity = 1
```

```
Standard basis: 6-31+G(d) (6D, 7F) #Basis: 300
SCF Energy= -870.414167194
MP2 Energy= -872.30738476521 Correl. Energy= -1.893217571
```

```
-----
No optimization variables found.

```

### Dienophile 3

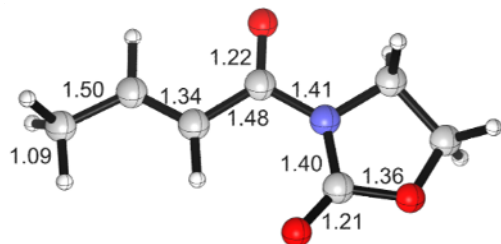

-----  
 Analyzing Gaussian Output File: a0\_s-cis\_0711xx.out  
 Using Gaussian 03: AM64L-G03RevC.02 12-Jun-2004  
 [#Processors=2 Memory=1800Mb CheckPoint=methyldienophileachiral\_s-cis.chk]  
 -----

# opt freq b3lyp/6-31g(d) geom=connectivity  
 #N Geom=AllCheck Guess=Read SCRF=Check GenChk RB3LYP/6-31G(d) Freq

-----  
 Pointgroup=C1 Stoichiometry=C7H9NO3 C1[X(C7H9NO3)]  
 Charge = 0 Multiplicity = 1  
 -----

Standard basis: 6-31G(d) (6D, 7F) #Basis: 183  
 SCF Energy= -552.598793369  
 Predicted Change= -2.332558D-08  
 -----

Optimization completed. {Found 1 times}  

| Item  | Max Val. | Criteria | Pass?   | RMS Val. | Criteria | Pass?   |
|-------|----------|----------|---------|----------|----------|---------|
| Force | 0.000012 | 0.000450 | [ YES ] | 0.000003 | 0.000300 | [ YES ] |
| Displ | 0.002214 | 0.001800 | [ NO ]  | 0.000578 | 0.001200 | [ YES ] |

| Center Number | Atomic Number | Atomic Type | Coordinates (Angstroms) |           |           |
|---------------|---------------|-------------|-------------------------|-----------|-----------|
|               |               |             | X                       | Y         | Z         |
| 1             | 6             | 0           | -4.099745               | -0.846027 | 0.804148  |
| 2             | 1             | 0           | -3.958189               | 0.241914  | 0.750462  |
| 3             | 1             | 0           | -5.054455               | -1.057592 | 0.303711  |
| 4             | 1             | 0           | -4.188025               | -1.132913 | 1.856273  |
| 5             | 6             | 0           | -2.976395               | -1.557436 | 0.120293  |
| 6             | 1             | 0           | -2.809569               | -1.333471 | -0.932695 |
| 7             | 6             | 0           | -2.162365               | -2.447003 | 0.707636  |
| 8             | 1             | 0           | -2.258682               | -2.716332 | 1.752213  |
| 9             | 6             | 0           | -1.087482               | -3.079895 | -0.085496 |
| 10            | 8             | 0           | -0.878240               | -2.853270 | -1.270439 |
| 11            | 6             | 0           | 0.823450                | -4.644166 | -0.215910 |
| 12            | 6             | 0           | 1.302851                | -5.719543 | 0.767333  |
| 13            | 1             | 0           | 1.597047                | -3.904711 | -0.451820 |
| 14            | 1             | 0           | 0.446361                | -5.050785 | -1.155732 |
| 15            | 1             | 0           | 2.389107                | -5.810104 | 0.820780  |
| 16            | 1             | 0           | 0.868229                | -6.701802 | 0.552628  |
| 17            | 7             | 0           | -0.255661               | -4.024451 | 0.551938  |
| 18            | 6             | 0           | -0.166188               | -4.365282 | 1.909257  |
| 19            | 8             | 0           | -0.813431               | -3.951353 | 2.838065  |
| 20            | 8             | 0           | 0.825543                | -5.285694 | 2.054688  |

-----  
 Statistical Thermodynamic Analysis for a0\_s-cis\_0711xx.out  
 Temperature= 298.150 Kelvin Pressure= 1.00000 Atm  
 -----

-----  
 SCF Energy= -552.598793369  
 Zero-point correction (ZPE)= -552.43950 0.159291  
 Internal Energy (U)= -552.42887 0.169915  
 Enthalpy (H)= -552.42793 0.170859  
 Gibbs Free Energy (G)= -552.47663 0.122157  
 Entropy (S)= 0.00016335  
 -----  
 Frequencies -- 48.7979 79.1381 111.7337  
 -----

Analyzing Gaussian Output File: SP\_MP2\_a0sc\_SM\_080502.out  
 Using Gaussian 03: IA64L-G03RevD.01 13-Oct-2005  
 [#Processors=2 Memory=1800Mb CheckPoint=SP\_MP2\_a0sc\_SM\_080502.chk]  
 -----

#p mp2/6-31+g(d) scf=tight

-----  
 Pointgroup=C1 Stoichiometry=C7H9NO3 C1[X(C7H9NO3)]  
 Charge = 0 Multiplicity = 1  
 -----

Standard basis: 6-31+G(d) (6D, 7F) #Basis: 227  
 SCF Energy= -549.386819685  
 MP2 Energy= -550.97928084211 Correl. Energy= -1.592461157  
 -----

No optimization variables found.  
 -----



## C. Optimized Structure and Energies of Diels–Alder Transition Structures

### 2c+A<sub>2</sub>, *endo* TS

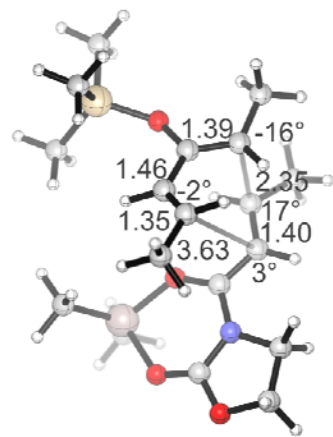

```

-----
Analyzing Gaussian Output File: MeMeOTMS_MeOxazolAlMe2_endo_s-cis.out
Using Gaussian 03: AM64L-G03RevC.02 12-Jun-2004
[#Processors=2 Memory=1800MB CheckPoint=MeMeOTMS_MeOxazolAlMe2_endo_s-cis.chk]
-----
# opt=modredundant b3lyp/6-31g(d) geom=connectivity
Modredundant Input: B 1 6 F
# b3lyp/6-31g* opt=(calcfc,ts,noeigentest,nofreeze) geom=check guess=read
freq=noraman
#N Geom=AllCheck Guess=Read SCRF=Check GenChk RB3LYP/6-31G(d) Freq
-----
Pointgroup=C1 Stoichiometry=C18H33AlNO4Si(1+) C1[X(C18H33AlNO4Si)]
Charge = 1 Multiplicity = 1
-----
Standard basis: 6-31G(d) (6D, 7F) #Basis: 449
SCF Energy= -1593.29850982
Predicted Change= -7.943272D-09
-----
Optimization completed. {Found 2 times}
Item Max Val. Criteria Pass? RMS Val. Criteria Pass?
Force 0.000006 || 0.000450 [ YES ] 0.000001 || 0.000300 [ YES ]
Displ 0.002102 || 0.001800 [ NO ] 0.000458 || 0.001200 [ YES ]
-----
Center Atomic Atomic Coordinates (Angstroms)

```

| Number | Number | Type | X         | Y         | Z         |
|--------|--------|------|-----------|-----------|-----------|
| 1      | 6      | 0    | -1.823899 | 2.375843  | 0.097226  |
| 2      | 6      | 0    | -2.018724 | 1.039584  | 0.425314  |
| 3      | 6      | 0    | -1.173073 | 0.300349  | 1.357215  |
| 4      | 6      | 0    | -0.416027 | 0.853354  | 2.326070  |
| 5      | 6      | 0    | 1.042686  | 1.884351  | -0.838962 |
| 6      | 6      | 0    | -0.179730 | 1.940906  | -1.525153 |
| 7      | 1      | 0    | -1.186643 | -0.782375 | 1.255799  |
| 8      | 1      | 0    | -0.616776 | 0.992668  | -1.823551 |
| 9      | 1      | 0    | 1.560814  | 2.812123  | -0.624547 |
| 10     | 1      | 0    | -0.441717 | 1.931940  | 2.474198  |
| 11     | 1      | 0    | -1.083233 | 2.911084  | 0.680729  |
| 12     | 6      | 0    | 1.661543  | 0.671392  | -0.527025 |
| 13     | 8      | 0    | 1.165303  | -0.478478 | -0.788630 |
| 14     | 7      | 0    | 2.948229  | 0.711255  | 0.073175  |
| 15     | 13     | 0    | 1.875065  | -2.216599 | -0.865808 |
| 16     | 6      | 0    | 3.690919  | 1.938096  | 0.408098  |
| 17     | 6      | 0    | 3.753860  | -0.384188 | 0.247069  |
| 18     | 8      | 0    | 3.497942  | -1.563797 | -0.034560 |
| 19     | 6      | 0    | 1.001133  | -3.371957 | 0.452222  |
| 20     | 6      | 0    | 2.294572  | -2.674591 | -2.719785 |
| 21     | 6      | 0    | 4.931971  | 1.358777  | 1.112602  |
| 22     | 1      | 0    | 3.103548  | 2.580865  | 1.066798  |
| 23     | 1      | 0    | 3.941157  | 2.488994  | -0.503942 |
| 24     | 8      | 0    | 4.919122  | -0.055002 | 0.776748  |
| 25     | 1      | 0    | 1.631712  | -4.240984 | 0.682488  |
| 26     | 1      | 0    | 0.795974  | -2.870676 | 1.407370  |
| 27     | 1      | 0    | 0.049096  | -3.772798 | 0.081411  |
| 28     | 1      | 0    | 2.830721  | -1.878877 | -3.253036 |
| 29     | 1      | 0    | 2.920375  | -3.574787 | -2.776021 |
| 30     | 1      | 0    | 1.386489  | -2.890000 | -3.298240 |
| 31     | 1      | 0    | 4.881955  | 1.435657  | 2.200866  |
| 32     | 1      | 0    | 5.873925  | 1.772652  | 0.754484  |
| 33     | 6      | 0    | -2.920936 | 3.192556  | -0.531934 |
| 34     | 1      | 0    | -3.695188 | 3.413136  | 0.216474  |
| 35     | 1      | 0    | -2.551337 | 4.152256  | -0.901104 |
| 36     | 1      | 0    | -3.412186 | 2.659230  | -1.350292 |
| 37     | 6      | 0    | 0.428980  | 0.079153  | 3.288686  |
| 38     | 1      | 0    | 0.414140  | -0.994572 | 3.080499  |
| 39     | 1      | 0    | 1.472047  | 0.423522  | 3.263732  |
| 40     | 1      | 0    | 0.082969  | 0.236918  | 4.318762  |
| 41     | 6      | 0    | -0.485179 | 3.114235  | -2.410996 |
| 42     | 1      | 0    | 0.112107  | 2.998871  | -3.327521 |
| 43     | 1      | 0    | -1.530857 | 3.153787  | -2.716750 |
| 44     | 1      | 0    | -0.203150 | 4.069114  | -1.955995 |
| 45     | 8      | 0    | -3.000017 | 0.389657  | -0.199224 |
| 46     | 1      | 0    | -3.979677 | -1.006942 | 0.117943  |
| 47     | 14     | 0    | -5.459664 | -0.724250 | -0.991824 |
| 48     | 1      | 0    | -6.168679 | -1.556814 | -0.910078 |
| 49     | 1      | 0    | -5.993157 | 0.193606  | -0.721595 |
| 50     | 1      | 0    | -5.163136 | -0.645122 | -2.043713 |
| 51     | 6      | 0    | -4.440048 | -1.008068 | 1.938867  |
| 52     | 1      | 0    | -3.572034 | -1.114704 | 2.598134  |
| 53     | 1      | 0    | -4.965645 | -0.087779 | 2.218031  |

|    |   |   |           |           |           |
|----|---|---|-----------|-----------|-----------|
| 54 | 1 | 0 | -5.115545 | -1.846542 | 2.148941  |
| 55 | 6 | 0 | -3.023207 | -2.542960 | -0.388130 |
| 56 | 1 | 0 | -3.680703 | -3.420055 | -0.340616 |
| 57 | 1 | 0 | -2.661935 | -2.462856 | -1.420006 |
| 58 | 1 | 0 | -2.162955 | -2.747819 | 0.258340  |

-----  
 Statistical Thermodynamic Analysis for MeMeOTMS\_MeOxazolAlMe2\_endo\_s-cis.out  
 Temperature= 298.150 Kelvin Pressure= 1.00000 Atm  
 -----

SCF Energy= -1593.29850982  
 Zero-point correction (ZPE)= -1592.81354 0.484968  
 Internal Energy (U)= -1592.77972 0.518784  
 Enthalpy (H)= -1592.77878 0.519729  
 Gibbs Free Energy (G)= -1592.88153 0.416973  
 Entropy (S)= 0.00034464  
 -----

Frequencies -- -193.8705 14.5054 16.5448  
 Frequencies -- 24.9405 38.4371 39.4197  
 -----

Analyzing Gaussian Output File: SP\_MP2\_1+a2\_n\_080427.log  
 Using Gaussian 03: IA64L-G03RevD.01 13-Oct-2005  
 [#Processors=4 Memory=4gB CheckPoint=SP\_MP2\_1+a2\_n\_080427.chk]  
 -----

#p mp2/6-31+g(d) scf=tight

Pointgroup=C1 Stoichiometry=C18H33AlNO4Si(1+) C1[X(C18H33AlNO4Si)]  
 Charge = 1 Multiplicity = 1  
 -----

Standard basis: 6-31+G(d) (6D, 7F) #Basis: 549  
 SCF Energy= -1585.51058517  
 MP2 Energy= -1588.8926871845 Correl. Energy= -3.382102017  
 -----

No optimization variables found.

## 2c+A<sub>2</sub>, exo TS

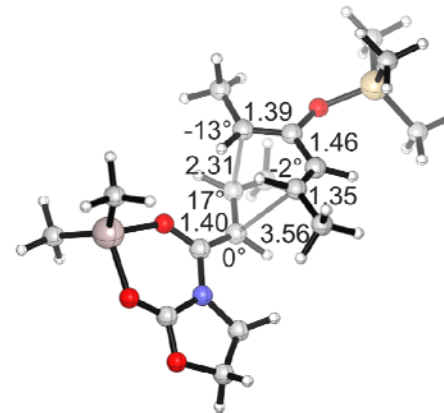

-----  
 Analyzing Gaussian Output File: MeMeOTMS\_MeOxazolAlMe2\_exo\_s-cis.out  
 Using Gaussian 03: AM64L-G03RevC.02 12-Jun-2004  
 [#Processors=2 Memory=1800MB CheckPoint=MeMeOTMS\_MeOxazolAlMe2\_exo\_s-cis.chk]  
 -----

# opt=modredundant b3lyp/6-31g(d) geom=connectivity  
 Modredundant Input: B 1 6 F  
 # b3lyp/6-31g\* opt=(calcfrc,ts,noeigentest,nofreeze) geom=check guess=read  
 freq=noraman  
 #N Geom=AllCheck Guess=Read SCRF=Check GenChk RB3LYP/6-31G(d) Freq  
 -----

Pointgroup=C1 Stoichiometry=C18H33AlNO4Si(1+) C1[X(C18H33AlNO4Si)]  
 Charge = 1 Multiplicity = 1  
 -----

Standard basis: 6-31G(d) (6D, 7F) #Basis: 449  
 SCF Energy= -1593.30320185  
 Predicted Change= -8.919766D-09  
 -----

Optimization completed. {Found 2 times}  

| Item  | Max Val. | Criteria | Pass?   | RMS Val. | Criteria | Pass?   |
|-------|----------|----------|---------|----------|----------|---------|
| Force | 0.000006 | 0.000450 | [ YES ] | 0.000001 | 0.000300 | [ YES ] |
| Displ | 0.002566 | 0.001800 | [ NO ]  | 0.000434 | 0.001200 | [ YES ] |

  
 -----

| Center Number | Atomic Number | Atomic Type | Coordinates (Angstroms) |           |           |
|---------------|---------------|-------------|-------------------------|-----------|-----------|
|               |               |             | X                       | Y         | Z         |
| 1             | 6             | 0           | 1.290351                | -1.443957 | 0.158963  |
| 2             | 6             | 0           | 2.176322                | -0.387754 | 0.295678  |
| 3             | 6             | 0           | 1.817221                | 0.900940  | 0.883185  |
| 4             | 6             | 0           | 0.793305                | 1.121062  | 1.731009  |
| 5             | 6             | 0           | -0.638654               | 0.337631  | -1.434184 |
| 6             | 6             | 0           | 0.244461                | -0.700146 | -1.758380 |
| 7             | 1             | 0           | 2.457134                | 1.737841  | 0.609005  |
| 8             | 1             | 0           | 0.182904                | 0.281756  | 2.061725  |
| 9             | 1             | 0           | 0.337440                | -1.353328 | 0.668535  |
| 10            | 6             | 0           | 1.735592                | -2.835579 | -0.198153 |

|    |    |   |           |           |           |
|----|----|---|-----------|-----------|-----------|
| 11 | 1  | 0 | 2.075886  | -3.367392 | 0.700989  |
| 12 | 1  | 0 | 0.913604  | -3.422887 | -0.621168 |
| 13 | 1  | 0 | 2.568638  | -2.831607 | -0.905240 |
| 14 | 6  | 0 | 0.456706  | 2.451288  | 2.329628  |
| 15 | 1  | 0 | 1.091806  | 3.252934  | 1.940903  |
| 16 | 1  | 0 | -0.593338 | 2.714310  | 2.142750  |
| 17 | 1  | 0 | 0.569778  | 2.420848  | 3.421435  |
| 18 | 8  | 0 | 3.399931  | -0.524812 | -0.224024 |
| 19 | 14 | 0 | 4.959288  | 0.160103  | 0.097205  |
| 20 | 6  | 0 | 6.115891  | -1.051962 | -0.736140 |
| 21 | 1  | 0 | 7.159088  | -0.735507 | -0.617508 |
| 22 | 1  | 0 | 6.022330  | -2.054971 | -0.305674 |
| 23 | 1  | 0 | 5.913846  | -1.126051 | -1.810606 |
| 24 | 6  | 0 | 5.197170  | 0.226892  | 1.958804  |
| 25 | 1  | 0 | 4.477200  | 0.887896  | 2.453585  |
| 26 | 1  | 0 | 5.104192  | -0.768858 | 2.406899  |
| 27 | 1  | 0 | 6.201363  | 0.599950  | 2.194799  |
| 28 | 6  | 0 | 5.068524  | 1.860156  | -0.702666 |
| 29 | 1  | 0 | 6.105168  | 2.217236  | -0.658812 |
| 30 | 1  | 0 | 4.783943  | 1.824616  | -1.760680 |
| 31 | 1  | 0 | 4.448882  | 2.616678  | -0.208230 |
| 32 | 1  | 0 | -0.153212 | -1.708441 | -1.701301 |
| 33 | 6  | 0 | 1.363121  | -0.478158 | -2.731199 |
| 34 | 1  | 0 | 2.166830  | -1.207954 | -2.611802 |
| 35 | 1  | 0 | 0.968368  | -0.593324 | -3.751043 |
| 36 | 1  | 0 | 1.786910  | 0.527452  | -2.649153 |
| 37 | 1  | 0 | -0.384254 | 1.354519  | -1.706937 |
| 38 | 6  | 0 | -1.840200 | 0.081289  | -0.766999 |
| 39 | 8  | 0 | -2.155052 | -1.068155 | -0.304797 |
| 40 | 7  | 0 | -2.763827 | 1.141851  | -0.593474 |
| 41 | 13 | 0 | -3.647272 | -1.761847 | 0.615056  |
| 42 | 6  | 0 | -2.620066 | 2.485572  | -1.177259 |
| 43 | 6  | 0 | -4.007502 | 0.998089  | -0.032737 |
| 44 | 8  | 0 | -4.490716 | -0.020399 | 0.481200  |
| 45 | 6  | 0 | -4.626979 | -2.993636 | -0.541481 |
| 46 | 6  | 0 | -3.154929 | -2.019485 | 2.492401  |
| 47 | 6  | 0 | -3.894236 | 3.185379  | -0.660393 |
| 48 | 1  | 0 | -2.582794 | 2.419626  | -2.268628 |
| 49 | 1  | 0 | -1.710168 | 2.969591  | -0.815875 |
| 50 | 8  | 0 | -4.701374 | 2.120415  | -0.089702 |
| 51 | 1  | 0 | -5.618742 | -3.222243 | -0.130213 |
| 52 | 1  | 0 | -4.782660 | -2.603104 | -1.555216 |
| 53 | 1  | 0 | -4.103659 | -3.953268 | -0.644534 |
| 54 | 1  | 0 | -2.640649 | -1.154334 | 2.932078  |
| 55 | 1  | 0 | -4.040172 | -2.209643 | 3.112994  |
| 56 | 1  | 0 | -2.493930 | -2.886637 | 2.622430  |
| 57 | 1  | 0 | -4.483564 | 3.657274  | -1.446171 |
| 58 | 1  | 0 | -3.695785 | 3.904527  | 0.136509  |

```
#p mp2/6-31+g(d) scf=tight
-----
Pointgroup=C1  Stoichiometry=C18H33AlNO4Si(1+)  C1[X(C18H33AlNO4Si)]
Charge = 1  Multiplicity = 1
-----
Standard basis: 6-31+G(d) (6D, 7F)  #Basis: 549
SCF Energy= -1585.51703867
MP2 Energy= -1588.8961179741  Correl. Energy= -3.3790793
-----
No optimization variables found.
```

Statistical Thermodynamic Analysis for MeMeOTMS\_MeOxazolAlMe2\_exo\_s-cis.out  
Temperature= 298.150 Kelvin Pressure= 1.00000 Atm

```
-----
SCF Energy= -1593.30320185
Zero-point correction (ZPE)= -1592.81872 0.484478
Internal Energy (U)= -1592.78447 0.518731
Enthalpy (H)= -1592.78352 0.519676
Gibbs Free Energy (G)= -1592.88855 0.414648
Entropy (S)= 0.00035226
-----
```

```
Frequencies -- -172.6185 13.2429 16.3670
Frequencies -- 23.0545 25.0315 35.6782
```

```
-----
Analyzing Gaussian Output File: SP_MP2_1+a2_x_080427.out
Using Gaussian 03: IA64L-G03RevD.01 13-Oct-2005
[#Processors=4 Memory=4gB CheckPoint=SP_MP2_1+a2_x_080427.chk]
-----
```

2e+A<sub>2</sub>, endo TS

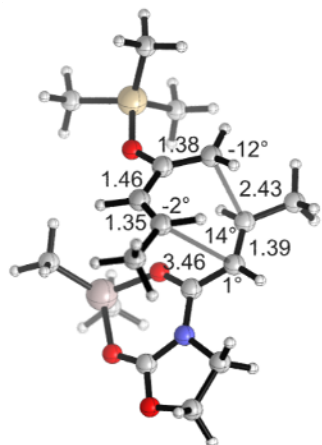

```
-----
Analyzing Gaussian Output File: 2+a_endo_sp_0711xx.out
Using Gaussian 03: AM64L-G03RevC.02 12-Jun-2004
[#Processors=2 Memory=1800MB CheckPoint=MeHOTMS_MeOxazolAlMe2_endo_s-cis.chk]
-----
# opt=modredundant b3lyp/6-31g(d) geom=connectivity
Modredundant Input: B 1 6 F
# b3lyp/6-31g* opt=(calcfc,ts,noeigentest,nofreeze) geom=check guess=read
freq=norman
#N Geom=AllCheck Guess=Read SCRF=Check GenChk RB3LYP/6-31G(d) Freq
-----
Pointgroup=C1 Stoichiometry=C17H31AlNO4Si(1+) C1[X(C17H31AlNO4Si)]
Charge = 1 Multiplicity = 1
-----
Standard basis: 6-31G(d) (6D, 7F) #Basis: 430
SCF Energy= -1553.98587047
Predicted Change= -5.207152D-10
-----
```

```
Optimization completed. {Found 3 times}
Item Max Val. Criteria Pass? RMS Val. Criteria Pass?
Force 0.000005 || 0.000450 [ YES ] 0.000001 || 0.000300 [ YES ]
Displ 0.000935 || 0.001800 [ YES ] 0.000128 || 0.001200 [ YES ]
```

| Center Number | Atomic Number | Atomic Type | Coordinates (Angstroms) |           |           |
|---------------|---------------|-------------|-------------------------|-----------|-----------|
|               |               |             | X                       | Y         | Z         |
| 1             | 6             | 0           | 1.949786                | -2.114624 | -0.148369 |
| 2             | 6             | 0           | 1.760496                | -1.074760 | 0.731128  |
| 3             | 6             | 0           | 0.723885                | -1.050032 | 1.761738  |
| 4             | 6             | 0           | -0.161178               | -2.029201 | 2.030648  |
| 5             | 6             | 0           | -0.954387               | -1.639493 | -1.313957 |
| 6             | 6             | 0           | 0.310777                | -1.663349 | -1.881628 |
| 7             | 1             | 0           | 0.701528                | -0.132169 | 2.344861  |
| 8             | 1             | 0           | 0.820235                | -0.713528 | -2.004742 |
| 9             | 1             | 0           | -1.556133               | -2.540937 | -1.313753 |

|    |    |   |           |           |           |
|----|----|---|-----------|-----------|-----------|
| 10 | 1  | 0 | -0.126920 | -2.959614 | 1.465329  |
| 11 | 1  | 0 | 1.487417  | -3.074456 | 0.040759  |
| 12 | 6  | 0 | -1.488832 | -0.447928 | -0.781836 |
| 13 | 8  | 0 | -0.830274 | 0.635626  | -0.707311 |
| 14 | 7  | 0 | -2.833100 | -0.446176 | -0.348897 |
| 15 | 13 | 0 | -1.228239 | 2.402034  | -0.158116 |
| 16 | 6  | 0 | -3.766162 | -1.580514 | -0.463394 |
| 17 | 6  | 0 | -3.501899 | 0.676829  | 0.078652  |
| 18 | 8  | 0 | -3.044413 | 1.818824  | 0.213794  |
| 19 | 6  | 0 | -0.362340 | 2.748874  | 1.560969  |
| 20 | 6  | 0 | -1.286872 | 3.556530  | -1.732842 |
| 21 | 6  | 0 | -5.033699 | -1.005413 | 0.201370  |
| 22 | 1  | 0 | -3.383470 | -2.453265 | 0.069451  |
| 23 | 1  | 0 | -3.919706 | -1.838186 | -1.515393 |
| 24 | 8  | 0 | -4.766083 | 0.415592  | 0.349721  |
| 25 | 1  | 0 | -0.452294 | 3.802337  | 1.853964  |
| 26 | 1  | 0 | -0.786413 | 2.154075  | 2.380559  |
| 27 | 1  | 0 | 0.710440  | 2.519371  | 1.517594  |
| 28 | 1  | 0 | -1.837725 | 3.115441  | -2.573346 |
| 29 | 1  | 0 | -1.767282 | 4.516543  | -1.503476 |
| 30 | 1  | 0 | -0.279166 | 3.792842  | -2.099159 |
| 31 | 1  | 0 | -5.214677 | -1.406740 | 1.200260  |
| 32 | 1  | 0 | -5.931651 | -1.106930 | -0.407311 |
| 33 | 6  | 0 | -1.178080 | -1.965286 | 3.128860  |
| 34 | 1  | 0 | -1.171108 | -0.996754 | 3.637375  |
| 35 | 1  | 0 | -2.192401 | -2.152722 | 2.749703  |
| 36 | 1  | 0 | -0.986031 | -2.745994 | 3.876948  |
| 37 | 6  | 0 | 0.741779  | -2.797387 | -2.764765 |
| 38 | 1  | 0 | 0.339849  | -2.619079 | -3.773155 |
| 39 | 1  | 0 | 1.826942  | -2.865889 | -2.861928 |
| 40 | 1  | 0 | 0.352341  | -3.761217 | -2.422599 |
| 41 | 8  | 0 | 2.466906  | 0.061116  | 0.693275  |
| 42 | 14 | 0 | 4.028531  | 0.474664  | 0.073051  |
| 43 | 6  | 0 | 3.962724  | 0.505574  | -1.809125 |
| 44 | 1  | 0 | 4.891808  | 0.936762  | -2.202384 |
| 45 | 1  | 0 | 3.858556  | -0.489515 | -2.256251 |
| 46 | 1  | 0 | 3.138954  | 1.132416  | -2.170833 |
| 47 | 6  | 0 | 5.274400  | -0.772228 | 0.721977  |
| 48 | 1  | 0 | 5.282008  | -0.788042 | 1.817682  |
| 49 | 1  | 0 | 5.082432  | -1.792534 | 0.373124  |
| 50 | 1  | 0 | 6.283489  | -0.497692 | 0.390828  |
| 51 | 6  | 0 | 4.299919  | 2.189477  | 0.770608  |
| 52 | 1  | 0 | 5.269066  | 2.591315  | 0.451681  |
| 53 | 1  | 0 | 3.525122  | 2.886919  | 0.432666  |
| 54 | 1  | 0 | 4.288511  | 2.179770  | 1.866009  |
| 55 | 1  | 0 | 2.794656  | -2.112701 | -0.825411 |

```
-----
Statistical Thermodynamic Analysis for 2+a_endo_sp_0711xx.out
Temperature= 298.150 Kelvin Pressure= 1.00000 Atm
-----
```

```
SCF Energy= -1553.98587047
Zero-point correction (ZPE)= -1553.52988 0.455991
Internal Energy (U)= -1553.49729 0.488581
Enthalpy (H)= -1553.49634 0.489525
Gibbs Free Energy (G)= -1553.59639 0.389472
Entropy (S)= 0.00033558
```

```
Frequencies -- -150.2332 17.7074 23.7090
Frequencies -- 28.2696 33.0103 41.5075
```

```
-----
Analyzing Gaussian Output File: SP_MP2_syn2+a2_n_080506.out
Using Gaussian 03: AM64L-G03RevC.02 12-Jun-2004
[#Processors=2 Memory=1800mb CheckPoint=SP_MP2_syn2+a2_n_080506.chk]
-----
```

```
#p mp2/6-31+g(d) scf=(direct,tight) geom=check guess=read
-----
Pointgroup=C1 Stoichiometry=C17H31AlNO4Si(1+) C1[X(C17H31AlNO4Si)]
```

Charge = 1 Multiplicity = 1

-----  
Standard basis: 6-31+G(d) (6D, 7F) #Basis: 526  
SCF Energy= -1546.48459853  
MP2 Energy= -1549.7238797036 Correl. Energy= -3.239281172  
-----

No optimization variables found.

## 2e+A<sub>2</sub>, *exo* TS

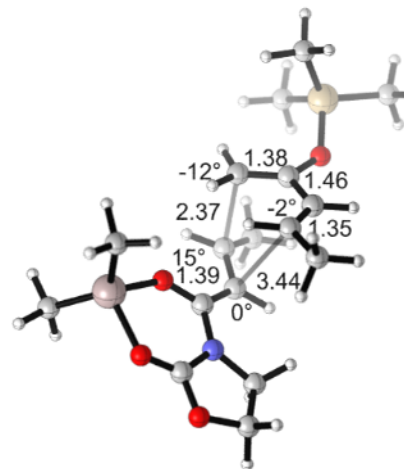

-----  
Analyzing Gaussian Output File: 2+a\_exo\_sp\_040208.out  
Using Gaussian 03: AM64L-G03RevC.02 12-Jun-2004  
[#Processors=2 Memory=1800MB CheckPoint=2+a\_exo\_040208.chk]  
-----

# opt=(modredundant,gdiis) b3lyp/6-31g(d)  
Modredundant Input: B 1 6 F  
# b3lyp/6-31g\* opt=(calcfc,ts,noeigentest,nofreeze,gdiis) geom=check  
guess=read freq=noraman  
#N Geom=AllCheck Guess=Read SCRF=Check GenChk RB3LYP/6-31G(d) Freq

Pointgroup=C1 Stoichiometry=C17H31AlNO4Si(1+) C1[X(C17H31AlNO4Si)]  
Charge = 1 Multiplicity = 1

-----  
Standard basis: 6-31G(d) (6D, 7F) #Basis: 430  
SCF Energy= -1553.98590590  
Predicted Change= -6.234866D-13  
-----

Optimization completed. {Found 3 times}  
Item Max Val. Criteria Pass? RMS Val. Criteria Pass?  
Force 0.000000 || 0.000450 [ YES ] 0.000000 || 0.000300 [ YES ]  
Displ 0.000019 || 0.001800 [ YES ] 0.000004 || 0.001200 [ YES ]

| Center Number | Atomic Number | Atomic Type | Coordinates (Angstroms) |           |           |
|---------------|---------------|-------------|-------------------------|-----------|-----------|
|               |               |             | X                       | Y         | Z         |
| 1             | 6             | 0           | -1.710355               | 0.984926  | 0.185317  |
| 2             | 6             | 0           | -2.263752               | -0.238285 | 0.486864  |
| 3             | 6             | 0           | -1.559693               | -1.308154 | 1.190561  |
| 4             | 6             | 0           | -0.362716               | -1.205900 | 1.800501  |
| 5             | 6             | 0           | 0.511414                | -0.469582 | -1.442778 |
| 6             | 6             | 0           | -0.490025               | 0.437643  | -1.775021 |
| 7             | 1             | 0           | -2.098421               | -2.253283 | 1.218829  |
| 8             | 1             | 0           | 0.154359                | -0.247309 | 1.814917  |

|    |    |   |           |           |           |
|----|----|---|-----------|-----------|-----------|
| 9  | 1  | 0 | -0.797480 | 1.305220  | 0.670708  |
| 10 | 6  | 0 | 0.300873  | -2.318852 | 2.550880  |
| 11 | 1  | 0 | -0.252679 | -3.258756 | 2.468509  |
| 12 | 1  | 0 | 1.327368  | -2.483322 | 2.194311  |
| 13 | 1  | 0 | 0.389312  | -2.064664 | 3.615589  |
| 14 | 8  | 0 | -3.480610 | -0.607642 | 0.066779  |
| 15 | 14 | 0 | -5.011230 | 0.206055  | 0.054924  |
| 16 | 6  | 0 | -6.229220 | -1.208012 | -0.080625 |
| 17 | 1  | 0 | -7.258673 | -0.831615 | -0.112268 |
| 18 | 1  | 0 | -6.063759 | -1.795080 | -0.991037 |
| 19 | 1  | 0 | -6.149173 | -1.885966 | 0.776088  |
| 20 | 6  | 0 | -5.126562 | 1.349555  | -1.434882 |
| 21 | 1  | 0 | -4.432344 | 2.196390  | -1.386079 |
| 22 | 1  | 0 | -4.950243 | 0.812549  | -2.373891 |
| 23 | 1  | 0 | -6.138438 | 1.770598  | -1.490765 |
| 24 | 6  | 0 | -5.157217 | 1.149116  | 1.671908  |
| 25 | 1  | 0 | -6.117168 | 1.677692  | 1.715257  |
| 26 | 1  | 0 | -5.113983 | 0.473361  | 2.533518  |
| 27 | 1  | 0 | -4.365896 | 1.897406  | 1.790547  |
| 28 | 1  | 0 | -0.243730 | 1.491987  | -1.698059 |
| 29 | 6  | 0 | -1.602303 | 0.059973  | -2.705150 |
| 30 | 1  | 0 | -2.437152 | 0.760411  | -2.650310 |
| 31 | 1  | 0 | -1.221015 | 0.085347  | -3.736572 |
| 32 | 1  | 0 | -1.975974 | -0.950299 | -2.512688 |
| 33 | 1  | 0 | 0.379381  | -1.517235 | -1.683997 |
| 34 | 6  | 0 | 1.686289  | -0.052223 | -0.796544 |
| 35 | 8  | 0 | 1.864131  | 1.135072  | -0.368718 |
| 36 | 7  | 0 | 2.727129  | -0.990701 | -0.613328 |
| 37 | 13 | 0 | 3.290697  | 2.040348  | 0.483553  |
| 38 | 6  | 0 | 2.728996  | -2.365753 | -1.142577 |
| 39 | 6  | 0 | 3.958419  | -0.683873 | -0.084774 |
| 40 | 8  | 0 | 4.329236  | 0.403550  | 0.376663  |
| 41 | 6  | 0 | 4.080232  | 3.330503  | -0.750731 |
| 42 | 6  | 0 | 2.815793  | 2.300505  | 2.363676  |
| 43 | 6  | 0 | 4.077633  | -2.896571 | -0.614897 |
| 44 | 1  | 0 | 2.677353  | -2.348624 | -2.235123 |
| 45 | 1  | 0 | 1.882231  | -2.932587 | -0.750202 |
| 46 | 8  | 0 | 4.772253  | -1.721557 | -0.113988 |
| 47 | 1  | 0 | 5.052577  | 3.685672  | -0.385521 |
| 48 | 1  | 0 | 4.245157  | 2.922395  | -1.756021 |
| 49 | 1  | 0 | 3.446768  | 4.219750  | -0.865449 |
| 50 | 1  | 0 | 2.431286  | 1.393239  | 2.848478  |
| 51 | 1  | 0 | 3.684002  | 2.627910  | 2.950164  |
| 52 | 1  | 0 | 2.050360  | 3.078595  | 2.483579  |
| 53 | 1  | 0 | 4.704911  | -3.342515 | -1.386102 |
| 54 | 1  | 0 | 3.968772  | -3.588981 | 0.221949  |
| 55 | 1  | 0 | -2.316380 | 1.761839  | -0.266444 |

```
-----
Pointgroup=C1  Stoichiometry=C17H31AlNO4Si(1+)  C1[X(C17H31AlNO4Si)]
Charge = 1      Multiplicity = 1
-----
```

```
Standard basis: 6-31+G(d) (6D, 7F)      #Basis: 526
SCF Energy= -1546.48393233
MP2 Energy= -1549.7212560658  Correl. Energy= -3.237323738
-----
```

```
No optimization variables found.
```

```
-----
Statistical Thermodynamic Analysis for 2+a_exo_sp_040208.out
Temperature= 298.150 Kelvin      Pressure= 1.00000 Atm
-----
```

```
SCF Energy= -1553.98590590
Zero-point correction (ZPE)= -1553.52952      0.456378
Internal Energy (U)= -1553.49702      0.488885
Enthalpy (H)= -1553.49607      0.4899830
Gibbs Free Energy (G)= -1553.59650      0.389403
Entropy (S)= 0.00033683
```

```
-----
Frequencies -- -157.9776      18.7232      21.0271
Frequencies -- 26.5028      27.8129      38.0269
-----
```

```
-----
Analyzing Gaussian Output File: SP_MP2_syn2+a2_x_080506.out
Using Gaussian 03: AM64L-G03RevC.02 12-Jun-2004
[#Processors=2 Memory=1800mb CheckPoint=SP_MP2_syn2+a2_x_080506.chk]
-----
```

```
#p mp2/6-31+g(d) scf=(direct,tight) geom=check guess=read
```

**2f+A<sub>2</sub>, endo TS**

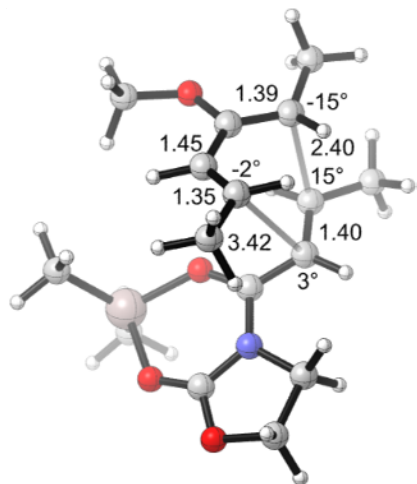

|    |    |   |           |           |           |
|----|----|---|-----------|-----------|-----------|
| 6  | 6  | 0 | 1.569878  | -1.106139 | -1.690568 |
| 7  | 1  | 0 | 1.240786  | 0.991838  | 2.003445  |
| 8  | 1  | 0 | 1.682164  | -0.046982 | -1.901809 |
| 9  | 1  | 0 | 0.178615  | -2.575514 | -0.991238 |
| 10 | 1  | 0 | 1.688530  | -2.035308 | 1.941730  |
| 11 | 1  | 0 | 3.017623  | -1.898131 | 0.311396  |
| 12 | 6  | 0 | -0.583265 | -0.593797 | -0.653066 |
| 13 | 8  | 0 | -0.429561 | 0.672738  | -0.711693 |
| 14 | 7  | 0 | -1.824007 | -1.091343 | -0.182413 |
| 15 | 13 | 0 | -1.605237 | 2.139846  | -0.566601 |
| 16 | 6  | 0 | -2.197482 | -2.514860 | -0.114735 |
| 17 | 6  | 0 | -2.916928 | -0.307401 | 0.088495  |
| 18 | 8  | 0 | -2.993696 | 0.927864  | 0.023915  |
| 19 | 6  | 0 | -1.133793 | 3.237166  | 0.986178  |
| 20 | 6  | 0 | -2.074259 | 2.778778  | -2.352179 |
| 21 | 6  | 0 | -3.589691 | -2.433676 | 0.540884  |
| 22 | 1  | 0 | -1.486412 | -3.075113 | 0.495605  |
| 23 | 1  | 0 | -2.227359 | -2.945058 | -1.120488 |
| 24 | 8  | 0 | -3.961266 | -1.031536 | 0.445623  |
| 25 | 1  | 0 | -1.995349 | 3.844451  | 1.294925  |
| 26 | 1  | 0 | -0.831565 | 2.655431  | 1.867090  |
| 27 | 1  | 0 | -0.326607 | 3.948529  | 0.767448  |
| 28 | 1  | 0 | -2.344255 | 1.971792  | -3.045447 |
| 29 | 1  | 0 | -2.927537 | 3.468480  | -2.316240 |
| 30 | 1  | 0 | -1.245826 | 3.331980  | -2.813895 |
| 31 | 1  | 0 | -3.581029 | -2.696173 | 1.600765  |
| 32 | 1  | 0 | -4.353978 | -3.010917 | 0.021779  |
| 33 | 6  | 0 | 4.572643  | -0.745221 | -0.793268 |
| 34 | 1  | 0 | 5.370699  | -0.397487 | -0.124335 |
| 35 | 1  | 0 | 4.896652  | -1.693109 | -1.227769 |
| 36 | 1  | 0 | 4.494125  | 0.001749  | -1.590854 |
| 37 | 6  | 0 | 0.160090  | -1.149823 | 3.257286  |
| 38 | 1  | 0 | -0.262142 | -0.164734 | 3.477236  |
| 39 | 1  | 0 | -0.656094 | -1.818987 | 2.951815  |
| 40 | 1  | 0 | 0.559094  | -1.568484 | 4.190837  |
| 41 | 6  | 0 | 2.311005  | -2.060548 | -2.582318 |
| 42 | 1  | 0 | 1.767115  | -2.120194 | -3.536671 |
| 43 | 1  | 0 | 3.321051  | -1.725160 | -2.816387 |
| 44 | 1  | 0 | 2.352033  | -3.072920 | -2.167191 |
| 45 | 8  | 0 | 3.256683  | 1.363730  | 0.346301  |
| 46 | 6  | 0 | 2.869812  | 2.566644  | 1.023745  |
| 47 | 1  | 0 | 3.038204  | 2.483661  | 2.102089  |
| 48 | 1  | 0 | 3.515669  | 3.342596  | 0.612886  |
| 49 | 1  | 0 | 1.823824  | 2.816391  | 0.821904  |

```
-----
Analyzing Gaussian Output File: 3+a_ap_endo_0711xx.out
Using Gaussian 03: AM64L-G03RevC.02 12-Jun-2004
[#Processors=2 Memory=1800MB CheckPoint=MeMeOMe_MeOxazolAlMe2_endo_s-cis.chk]
-----
# opt=modredundant b3lyp/6-31g(d) geom=connectivity
Modredundant Input: B 1 6 F
# b3lyp/6-31g* opt=(calcf,ts,noeigentest,nofreeze) geom=check guess=read
freq=norman
#N Geom=AllCheck Guess=Read SCRF=Check GenChk RB3LYP/6-31G(d) Freq
-----
Pointgroup=C1 Stoichiometry=C16H27AlNO4(1+) C1[X(C16H27AlNO4)]
Charge = 1 Multiplicity = 1
-----
```

```
Standard basis: 6-31G(d) (6D, 7F) #Basis: 388
SCF Energy=-1223.88357865
Predicted Change= -5.962382D-09
-----
```

```
Optimization completed. {Found 2 times}
Item Max Val. Criteria Pass? RMS Val. Criteria Pass?
Force 0.000006 || 0.000450 [ YES ] 0.000001 || 0.000300 [ YES ]
Displ 0.002079 || 0.001800 [ NO ] 0.000384 || 0.001200 [ YES ]
-----
```

| Center Number | Atomic Number | Atomic Type | Coordinates (Angstroms) |           |           |
|---------------|---------------|-------------|-------------------------|-----------|-----------|
|               |               |             | X                       | Y         | Z         |
| 1             | 6             | 0           | 3.283821                | -0.904210 | -0.027953 |
| 2             | 6             | 0           | 2.743668                | 0.162878  | 0.672282  |
| 3             | 6             | 0           | 1.691192                | 0.061683  | 1.670645  |
| 4             | 6             | 0           | 1.231753                | -1.085526 | 2.213918  |
| 5             | 6             | 0           | 0.386692                | -1.514880 | -1.072530 |

```
-----
Statistical Thermodynamic Analysis for 3+a_ap_endo_0711xx.out
Temperature= 298.150 Kelvin Pressure= 1.00000 Atm
-----
SCF Energy=-1223.88357865
Zero-point correction (ZPE)= -1223.47219 0.411381
Internal Energy (U)= -1223.44468 0.438890
Enthalpy (H)= -1223.44374 0.439834
Gibbs Free Energy (G)= -1223.53183 0.351740
Entropy (S)= 0.00029547
-----
Frequencies -- -157.7583 15.0259 26.1153
Frequencies -- 37.0582 44.3551 47.5156
-----
```

```
-----
Analyzing Gaussian Output File: SP_MP2_3a+a2_n_080501.out
Using Gaussian 03: IA64L-G03RevD.01 13-Oct-2005
[#Processors=4 Memory=4gb CheckPoint=SP_MP2_3a+a2_n_080501.chk]
-----
#p mp2/6-31g(d) scf=(direct,tight) geom=check guess=read
-----
Pointgroup=C1 Stoichiometry=C16H27AlNO4(1+) C1[X(C16H27AlNO4)]
Charge = 1 Multiplicity = 1
-----
```

```

-----
Standard basis: 6-31+G(d) (6D, 7F)      #Basis: 476
SCF Energy= -1217.26739887
MP2 Energy= -1220.2958120964   Correl. Energy= -3.028413223
=====
No optimization variables found.

```

## 2f+A<sub>2</sub>, *exo* TS

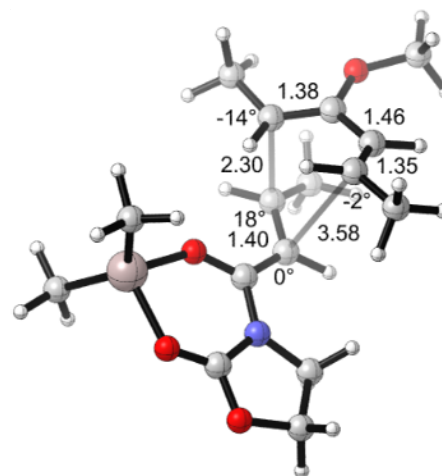

```

-----
Analyzing Gaussian Output File: 3+a_ap_exo_0711xx.out
Using Gaussian 03: AM64L-G03RevC.02 12-Jun-2004
[#Processors=2 Memory=1800MB CheckPoint=MeMeOMe2_MeOxazolAlMe2_exo_s-cis.chk]
=====
# opt=modredundant rb3lyp/6-31g(d) geom=connectivity
Modredundant Input: B 1 6 F
# b3lyp/6-31g* opt=(calcfc,ts,noeigentest,nofreeze) geom=check guess=read
freq=noraman
#N Geom=AllCheck Guess=Read SCRF=Check GenChk RB3LYP/6-31G(d) Freq
-----
Pointgroup=C1 Stoichiometry=C16H27AlNO4(1+) C1[X(C16H27AlNO4)]
Charge = 1 Multiplicity = 1
-----
Standard basis: 6-31G(d) (6D, 7F)      #Basis: 388
SCF Energy= -1223.88681897
Predicted Change= -5.265475D-09
=====
Optimization completed. {Found 2 times}
Item Max Val. Criteria Pass? RMS Val. Criteria Pass?
Force 0.000005 || 0.000450 [ YES ] 0.000001 || 0.000300 [ YES ]
Displ 0.002359 || 0.001800 [ NO ] 0.000488 || 0.001200 [ YES ]
-----
Center Atomic Atomic Coordinates (Angstroms)
Number Number Type X Y Z
-----
1 6 0 -2.339450 1.265579 0.221025
2 6 0 -3.194911 0.193846 0.414221
3 6 0 -2.798188 -1.073225 1.014324
4 6 0 -1.744577 -1.239532 1.839520
5 6 0 -0.376154 -0.457723 -1.377855

```



|    |    |   |           |           |           |
|----|----|---|-----------|-----------|-----------|
| 6  | 6  | 0 | -1.323522 | 0.520674  | -1.705386 |
| 7  | 1  | 0 | -3.408575 | -1.942820 | 0.782735  |
| 8  | 1  | 0 | -1.160290 | -0.371853 | 2.142261  |
| 9  | 1  | 0 | -1.371948 | 1.209081  | 0.705960  |
| 10 | 6  | 0 | -2.832123 | 2.638726  | -0.149847 |
| 11 | 1  | 0 | -3.240574 | 3.147992  | 0.733376  |
| 12 | 1  | 0 | -2.016225 | 3.260807  | -0.531443 |
| 13 | 1  | 0 | -3.630216 | 2.607081  | -0.896122 |
| 14 | 6  | 0 | -1.343773 | -2.545424 | 2.449830  |
| 15 | 1  | 0 | -1.954825 | -3.377667 | 2.088128  |
| 16 | 1  | 0 | -0.288344 | -2.769434 | 2.244378  |
| 17 | 1  | 0 | -1.434797 | -2.500163 | 3.543246  |
| 18 | 8  | 0 | -4.443510 | 0.351149  | -0.065468 |
| 19 | 1  | 0 | -0.978697 | 1.549836  | -1.694478 |
| 20 | 6  | 0 | -2.457202 | 0.208272  | -2.636149 |
| 21 | 1  | 0 | -3.316655 | 0.864626  | -2.480359 |
| 22 | 1  | 0 | -2.116125 | 0.363740  | -3.669689 |
| 23 | 1  | 0 | -2.787040 | -0.831637 | -2.548164 |
| 24 | 1  | 0 | -0.578665 | -1.494255 | -1.618448 |
| 25 | 6  | 0 | 0.827973  | -0.114670 | -0.753767 |
| 26 | 8  | 0 | 1.082524  | 1.061655  | -0.323963 |
| 27 | 7  | 0 | 1.821209  | -1.111217 | -0.590936 |
| 28 | 13 | 0 | 2.540838  | 1.857050  | 0.571119  |
| 29 | 6  | 0 | 1.753186  | -2.467049 | -1.161130 |
| 30 | 6  | 0 | 3.069595  | -0.877510 | -0.070382 |
| 31 | 8  | 0 | 3.496884  | 0.176338  | 0.420821  |
| 32 | 6  | 0 | 3.415912  | 3.152078  | -0.599292 |
| 33 | 6  | 0 | 2.058505  | 2.076582  | 2.456050  |
| 34 | 6  | 0 | 3.086485  | -3.073597 | -0.676517 |
| 35 | 1  | 0 | 1.680480  | -2.413116 | -2.251359 |
| 36 | 1  | 0 | 0.889770  | -3.009847 | -0.770434 |
| 37 | 8  | 0 | 3.836238  | -1.950112 | -0.140926 |
| 38 | 1  | 0 | 4.399536  | 3.440867  | -0.206717 |
| 39 | 1  | 0 | 3.575379  | 2.774721  | -1.617374 |
| 40 | 1  | 0 | 2.832101  | 4.077580  | -0.687935 |
| 41 | 1  | 0 | 1.625480  | 1.172392  | 2.904814  |
| 42 | 1  | 0 | 2.934446  | 2.341071  | 3.062402  |
| 43 | 1  | 0 | 1.329813  | 2.886046  | 2.596147  |
| 44 | 1  | 0 | 3.682854  | -3.513861 | -1.475204 |
| 45 | 1  | 0 | 2.960911  | -3.794872 | 0.133134  |
| 46 | 6  | 0 | -5.463803 | -0.633954 | 0.153284  |
| 47 | 1  | 0 | -5.542425 | -0.890029 | 1.214027  |
| 48 | 1  | 0 | -6.388781 | -0.164507 | -0.181325 |
| 49 | 1  | 0 | -5.280752 | -1.535591 | -0.440830 |

```

-----
Standard basis: 6-31+G(d) (6D, 7F) #Basis: 476
SCF Energy= -1217.27182283
MP2 Energy= -1220.2964101443 Correl. Energy= -3.024587318
-----
No optimization variables found.

```

```

-----
Statistical Thermodynamic Analysis for 3+a_ap_exo_0711xx.out
Temperature= 298.150 Kelvin Pressure= 1.00000 Atm
-----

```

```

SCF Energy= -1223.88681897
Zero-point correction (ZPE)= -1223.47565 0.411168
Internal Energy (U)= -1223.44782 0.438992
Enthalpy (H)= -1223.44688 0.439937
Gibbs Free Energy (G)= -1223.53673 0.350082
Entropy (S)= 0.00030137
-----

```

```

Frequencies -- -164.1526 15.7262 20.5998
Frequencies -- 29.3669 35.0578 49.8706
-----

```

```

Analyzing Gaussian Output File: SP_MP2_3a+a2_x_080501.out
Using Gaussian 03: IA64L-G03RevD.01 13-Oct-2005
[#Processors=4 Memory=4gb CheckPoint=SP_MP2_3a+a2_x_080501.chk]
-----

```

```
#p mp2/6-31+g(d) scf=(direct,tight) geom=check guess=read
```

```

Pointgroup=C1 Stoichiometry=C16H27AlNO4(1+) C1[X(C16H27AlNO4)]
Charge = 1 Multiplicity = 1

```

2c+3, endo TS

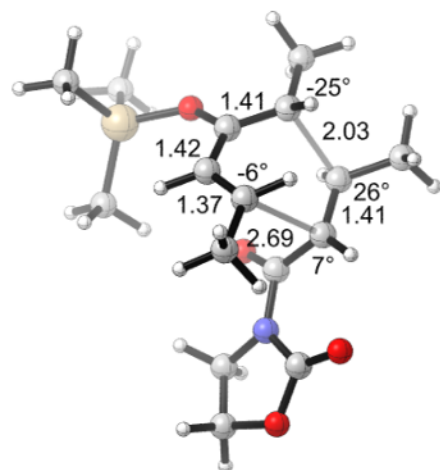

```
-----
Analyzing Gaussian Output File: l+a0ac_n_080217.out
Using Gaussian 03: AM64L-G03RevC.02 12-Jun-2004
[#Processors=2 Memory=1800MB CheckPoint=l+a0ac_n_080217.chk]
-----
# opt=(gdiis,modredundant) b3lyp/6-31g(d) geom=connectivity
Modredundant Input: B 1 6 F
# b3lyp/6-31g* opt=(calcfc,ts,noeigentest,nofreeze,gdiis) geom=check
guess=read freq=noraman
#N Geom=AllCheck Guess=Read SCRF=Check GenChk RB3LYP/6-31G(d) Freq
-----
Pointgroup=C1 Stoichiometry=C16H27NO4Si C1[X(C16H27NO4Si)]
Charge = 0 Multiplicity = 1
-----
Standard basis: 6-31G(d) (6D, 7F) #Basis: 388
SCF Energy= -1271.12918213
Predicted Change= -2.758604D-09
-----
Optimization completed. {Found 2 times}
Item Max Val. Criteria Pass? RMS Val. Criteria Pass?
Force 0.000010 || 0.000450 [ YES ] 0.000002 || 0.000300 [ YES ]
Displ 0.002304 || 0.001800 [ NO ] 0.000293 || 0.001200 [ YES ]
-----
```

| Center Number | Atomic Number | Atomic Type | Coordinates (Angstroms) |          |           |
|---------------|---------------|-------------|-------------------------|----------|-----------|
|               |               |             | X                       | Y        | Z         |
| 1             | 6             | 0           | -1.434181               | 2.237679 | 0.259332  |
| 2             | 6             | 0           | -1.620533               | 0.883892 | 0.622689  |
| 3             | 6             | 0           | -0.731435               | 0.197208 | 1.489710  |
| 4             | 6             | 0           | 0.395323                | 0.763241 | 2.019442  |
| 5             | 6             | 0           | 1.317366                | 1.530037 | -0.386512 |

|    |    |   |           |           |           |
|----|----|---|-----------|-----------|-----------|
| 6  | 6  | 0 | 0.259524  | 2.337297  | -0.864161 |
| 7  | 1  | 0 | -0.878304 | -0.872732 | 1.614771  |
| 8  | 1  | 0 | -0.253524 | 1.939932  | -1.738113 |
| 9  | 1  | 0 | 2.166219  | 1.966358  | 0.121700  |
| 10 | 1  | 0 | 0.512217  | 1.840663  | 2.007303  |
| 11 | 1  | 0 | -1.010084 | 2.854329  | 1.047607  |
| 12 | 6  | 0 | 1.377031  | 0.161018  | -0.806099 |
| 13 | 8  | 0 | 0.464412  | -0.423740 | -1.407412 |
| 14 | 7  | 0 | 2.548109  | -0.615150 | -0.535203 |
| 15 | 6  | 0 | 2.655795  | -1.949052 | -1.120059 |
| 16 | 6  | 0 | 3.753197  | -0.211905 | 0.023876  |
| 17 | 8  | 0 | 4.044277  | 0.849356  | 0.526546  |
| 18 | 6  | 0 | 3.976112  | -2.436843 | -0.506362 |
| 19 | 1  | 0 | 2.689473  | -1.887546 | -2.214111 |
| 20 | 1  | 0 | 1.800945  | -2.569288 | -0.845254 |
| 21 | 8  | 0 | 4.643492  | -1.246249 | -0.054498 |
| 22 | 1  | 0 | 4.627378  | -2.945186 | -1.220273 |
| 23 | 1  | 0 | 3.814065  | -3.090170 | 0.358623  |
| 24 | 6  | 0 | -2.537046 | 2.899168  | -0.543833 |
| 25 | 1  | 0 | -3.499745 | 2.818366  | -0.023775 |
| 26 | 1  | 0 | -2.337566 | 3.961190  | -0.705341 |
| 27 | 1  | 0 | -2.661955 | 2.417609  | -1.519185 |
| 28 | 6  | 0 | 1.401363  | 0.015989  | 2.841195  |
| 29 | 1  | 0 | 1.266707  | -1.068171 | 2.765577  |
| 30 | 1  | 0 | 2.420317  | 0.267722  | 2.527712  |
| 31 | 1  | 0 | 1.318874  | 0.295115  | 3.901950  |
| 32 | 6  | 0 | 0.532929  | 3.833354  | -0.893573 |
| 33 | 1  | 0 | 1.261358  | 4.057119  | -1.682955 |
| 34 | 1  | 0 | -0.358445 | 4.431426  | -1.097056 |
| 35 | 1  | 0 | 0.967650  | 4.175996  | 0.052942  |
| 36 | 8  | 0 | -2.632822 | 0.235188  | 0.013851  |
| 37 | 14 | 0 | -3.196588 | -1.369807 | -0.081819 |
| 38 | 6  | 0 | -4.347785 | -1.315626 | -1.565013 |
| 39 | 1  | 0 | -4.865027 | -2.273694 | -1.698861 |
| 40 | 1  | 0 | -5.109199 | -0.536243 | -1.449369 |
| 41 | 1  | 0 | -3.789269 | -1.105262 | -2.484116 |
| 42 | 6  | 0 | -4.145567 | -1.742469 | 1.504353  |
| 43 | 1  | 0 | -3.500181 | -1.674656 | 2.388055  |
| 44 | 1  | 0 | -4.978211 | -1.043988 | 1.646115  |
| 45 | 1  | 0 | -4.561779 | -2.757486 | 1.477013  |
| 46 | 6  | 0 | -1.804739 | -2.607852 | -0.357973 |
| 47 | 1  | 0 | -2.189488 | -3.476437 | -0.907399 |
| 48 | 1  | 0 | -0.998701 | -2.152325 | -0.943602 |
| 49 | 1  | 0 | -1.377255 | -2.976538 | 0.581963  |

```
-----
Statistical Thermodynamic Analysis for l+a0ac_n_080217.out
Temperature= 298.150 Kelvin Pressure= 1.00000 Atm
-----
SCF Energy= -1271.12918213
Zero-point correction (ZPE)= -1270.71847 0.410713
Internal Energy (U)= -1270.69167 0.437511
Enthalpy (H)= -1270.69072 0.438455
Gibbs Free Energy (G)= -1270.77549 0.353687
Entropy (S)= 0.00028431
-----
Frequencies -- -405.5773 28.1412 29.3065
Frequencies -- 41.4262 53.8699 62.3325
-----
```

```
-----
Analyzing Gaussian Output File: SP_MP2_1+a0ac_n_080502.out
Using Gaussian 03: IA64L-G03RevD.01 13-Oct-2005
[#Processors=4 Memory=4gb CheckPoint=SP_MP2_1+a0ac_n_080502.chk]
-----
#p mp2/6-31+g(d) scf=(direct,tight) geom=check guess=read
-----
Pointgroup=C1 Stoichiometry=C16H27NO4Si C1[X(C16H27NO4Si)]
Charge = 0 Multiplicity = 1
-----
```

```

-----
Standard basis: 6-31+G(d) (6D, 7F)   #Basis: 476
SCF Energy= -1264.43584646
MP2 Energy= -1267.5392379172   Correl. Energy= -3.103391455
=====
No optimization variables found.

```

## 2c+3, *exo* TS

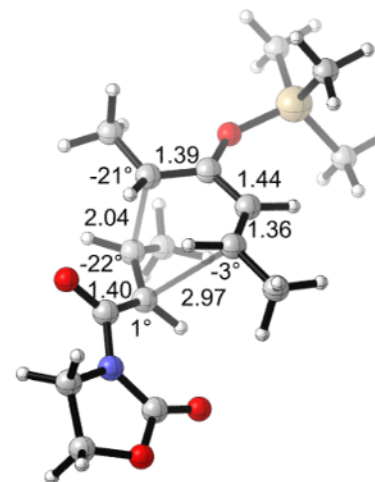

```

-----
Analyzing Gaussian Output File: 1+a0ac_x_080217.out
Using Gaussian 03: AM64L-G03RevC.02 12-Jun-2004
[#Processors=2 Memory=1800MB CheckPoint=1+a0ac_x_080217.chk]
=====
# b3lyp/6-31g* opt=(calcfc,ts,noeigentest,nofreeze,gdiis) geom=check
guess=read freq=noraman
#N Geom=AllCheck Guess=Read SCRF=Check GenChk RB3LYP/6-31G(d) Freq
-----
Pointgroup=C1 Stoichiometry=C16H27NO4Si C1[X(C16H27NO4Si)]
Charge = 0 Multiplicity = 1
-----
Standard basis: 6-31G(d) (6D, 7F)   #Basis: 388
SCF Energy= -1271.13038165
Predicted Change= -9.469143D-10
=====
Optimization completed.           {Found 2 times}
Item      Max Val.   Criteria   Pass?     RMS Val.   Criteria   Pass?
Force     0.000007   0.000450  [ YES ]   0.000001   0.000300  [ YES ]
Displ     0.000474   0.001800  [ YES ]   0.000085   0.001200  [ YES ]
-----
Center   Atomic   Atomic          Coordinates (Angstroms)
Number   Number   Type              X           Y           Z
-----
1         6         0         0.903994    1.538391    -0.663847
2         6         0         1.662936    0.356113    -0.528721
3         6         0         1.073099    -0.934011    -0.604867
4         6         0         -0.216230   -1.173551    -0.994271
5         6         0         -1.330884    0.640389    0.792384
6         6         0         -0.263158    1.566272    0.912111
7         1         0         1.650952    -1.771314    -0.218234

```

|    |    |   |           |           |           |
|----|----|---|-----------|-----------|-----------|
| 8  | 1  | 0 | -0.766707 | -0.407521 | -1.528146 |
| 9  | 1  | 0 | 0.057196  | 1.474558  | -1.342566 |
| 10 | 6  | 0 | 1.618334  | 2.872718  | -0.727600 |
| 11 | 1  | 0 | 2.215881  | 2.949516  | -1.644926 |
| 12 | 1  | 0 | 0.893374  | 3.692914  | -0.734294 |
| 13 | 1  | 0 | 2.301805  | 3.016270  | 0.114089  |
| 14 | 6  | 0 | -0.852388 | -2.529606 | -0.925001 |
| 15 | 1  | 0 | -0.164766 | -3.277387 | -0.515819 |
| 16 | 1  | 0 | -1.741856 | -2.509883 | -0.285159 |
| 17 | 1  | 0 | -1.174320 | -2.864684 | -1.920720 |
| 18 | 8  | 0 | 2.948041  | 0.498179  | -0.118841 |
| 19 | 14 | 0 | 4.276452  | -0.552075 | 0.037047  |
| 20 | 6  | 0 | 5.710055  | 0.618134  | 0.356095  |
| 21 | 1  | 0 | 6.650262  | 0.066429  | 0.477204  |
| 22 | 1  | 0 | 5.838168  | 1.321014  | -0.474609 |
| 23 | 1  | 0 | 5.547442  | 1.204667  | 1.267382  |
| 24 | 6  | 0 | 4.525734  | -1.508233 | -1.567408 |
| 25 | 1  | 0 | 3.666052  | -2.139150 | -1.817342 |
| 26 | 1  | 0 | 4.692307  | -0.824923 | -2.408224 |
| 27 | 1  | 0 | 5.405134  | -2.159929 | -1.490831 |
| 28 | 6  | 0 | 4.037733  | -1.709757 | 1.506212  |
| 29 | 1  | 0 | 4.967392  | -2.256343 | 1.709873  |
| 30 | 1  | 0 | 3.782604  | -1.144920 | 2.410352  |
| 31 | 1  | 0 | 3.249418  | -2.452932 | 1.345176  |
| 32 | 1  | 0 | -0.543458 | 2.589425  | 0.660506  |
| 33 | 6  | 0 | 0.622053  | 1.445477  | 2.138521  |
| 34 | 1  | 0 | 1.522325  | 2.062930  | 2.064545  |
| 35 | 1  | 0 | 0.069767  | 1.767695  | 3.030407  |
| 36 | 1  | 0 | 0.930909  | 0.407216  | 2.302692  |
| 37 | 1  | 0 | -1.419111 | -0.207683 | 1.456288  |
| 38 | 6  | 0 | -2.397512 | 0.950150  | -0.113640 |
| 39 | 8  | 0 | -2.343612 | 1.831317  | -0.985478 |
| 40 | 7  | 0 | -3.622675 | 0.215370  | -0.044848 |
| 41 | 6  | 0 | -4.709529 | 0.557816  | -0.958060 |
| 42 | 6  | 0 | -3.946580 | -0.894376 | 0.722590  |
| 43 | 8  | 0 | -3.248598 | -1.530963 | 1.478786  |
| 44 | 6  | 0 | -5.875131 | -0.208588 | -0.320217 |
| 45 | 1  | 0 | -4.483930 | 0.217428  | -1.976046 |
| 46 | 1  | 0 | -4.863277 | 1.637339  | -0.991307 |
| 47 | 8  | 0 | -5.251254 | -1.226410 | 0.484175  |
| 48 | 1  | 0 | -6.527570 | -0.699029 | -1.045272 |
| 49 | 1  | 0 | -6.479374 | 0.428754  | 0.335439  |

SCF Energy= -1264.43838854  
 MP2 Energy= -1267.5375614304 Correl. Energy= -3.099172891  
 =====  
 No optimization variables found.

-----  
 Statistical Thermodynamic Analysis for 1+a0ac\_x\_080217.out  
 Temperature= 298.150 Kelvin Pressure= 1.00000 Atm  
 =====  
 SCF Energy= -1271.13038165  
 Zero-point correction (ZPE)= -1270.71994 0.410434  
 Internal Energy (U)= -1270.69293 0.437452  
 Enthalpy (H)= -1270.69198 0.438396  
 Gibbs Free Energy (G)= -1270.77804 0.352342  
 Entropy (S)= 0.00028863  
 -----  
 Frequencies -- -398.8900 18.4804 31.6915  
 Frequencies -- 35.1604 47.6626 51.9330  
 -----

-----  
 Analyzing Gaussian Output File: SP\_MP2\_1+a0ac\_x\_080502.out  
 Using Gaussian 03: IA64L-G03RevD.01 13-Oct-2005  
 [#Processors=4 Memory=4gb CheckPoint=SP\_MP2\_1+a0ac\_x\_080502.chk]  
 =====  
 #p mp2/6-31+g(d) scf=(direct,tight) geom=check guess=read  
 -----  
 Pointgroup=C1 Stoichiometry=C16H27NO4Si C1[X(C16H27NO4Si)]  
 Charge = 0 Multiplicity = 1  
 -----  
 Standard basis: 6-31+G(d) (6D, 7F) #Basis: 476  
 -----

# 18+A<sub>2</sub>, *endo* TS

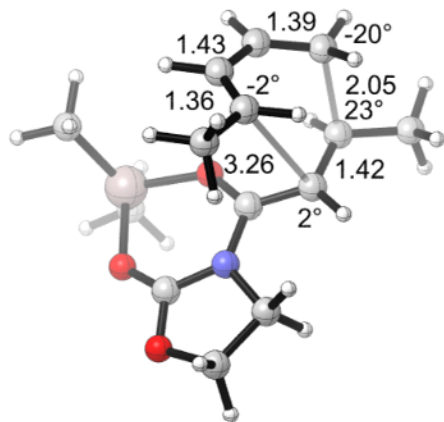

```

-----
Analyzing Gaussian Output File: 8+a2_n_080226.out
Using Gaussian 03: AM64L-G03RevC.02 12-Jun-2004
[#Processors=2 Memory=1800MB CheckPoint=8+a2_n_080226.chk]
-----
# opt=(modredundant,gdiis) b3lyp/6-31g(d) geom=connectivity
Modredundant Input: B 1 6 F
# b3lyp/6-31g* opt=(calcfc,ts,noeigentest,nofreeze,gdiis) geom=check
guess=read freq=noraman
#N Geom=AllCheck Guess=Read SCRF=Check GenChk RB3LYP/6-31G(d) Freq
-----
Pointgroup=C1 Stoichiometry=C14H23AlNO3(1+) C1[X(C14H23AlNO3)]
Charge = 1 Multiplicity = 1
-----
Standard basis: 6-31G(d) (6D, 7F) #Basis: 335
SCF Energy= -1070.03581270
Predicted Change= -2.805976D-09
-----
Optimization completed on the basis of negligible forces. {Found 3 times}
Item Max Val. Criteria Pass? RMS Val. Criteria Pass?
Force 0.000001 || 0.000450 [ YES ] 0.000000 || 0.000300 [ YES ]
Displ 0.002475 || 0.001800 [ NO ] 0.000308 || 0.001200 [ YES ]
-----
Center Atomic Atomic Coordinates (Angstroms)
Number Number Type X Y Z
-----
1 6 0 3.550537 0.724661 -0.047853
2 6 0 2.734088 1.226102 0.958854
3 6 0 2.001441 0.453980 1.908586
4 6 0 2.011964 -0.906502 1.977081
5 6 0 1.347026 -0.703703 -1.209037
6 6 0 2.335137 0.219556 -1.625810
7 1 0 1.355378 1.002332 2.590589
8 1 0 1.978825 1.234241 -1.778729
9 1 0 1.523390 -1.765979 -1.330489
10 1 0 2.687240 -1.468237 1.334714
11 1 0 3.982812 -0.266160 0.056773

```

|    |    |   |           |           |           |
|----|----|---|-----------|-----------|-----------|
| 12 | 6  | 0 | 0.123954  | -0.247465 | -0.707090 |
| 13 | 8  | 0 | -0.107043 | 0.989141  | -0.483044 |
| 14 | 7  | 0 | -0.915585 | -1.179183 | -0.466140 |
| 15 | 13 | 0 | -1.634263 | 1.968828  | 0.047977  |
| 16 | 6  | 0 | -0.860082 | -2.609508 | -0.811833 |
| 17 | 6  | 0 | -2.192025 | -0.830678 | -0.102422 |
| 18 | 8  | 0 | -2.617419 | 0.302582  | 0.161496  |
| 19 | 6  | 0 | -1.383357 | 2.612392  | 1.879848  |
| 20 | 6  | 0 | -2.319895 | 2.971268  | -1.481464 |
| 21 | 6  | 0 | -2.237074 | -3.097160 | -0.317728 |
| 22 | 1  | 0 | -0.037773 | -3.105366 | -0.291610 |
| 23 | 1  | 0 | -0.727633 | -2.731642 | -1.891214 |
| 24 | 8  | 0 | -2.989193 | -1.881651 | -0.054252 |
| 25 | 1  | 0 | -2.306085 | 3.064758  | 2.265682  |
| 26 | 1  | 0 | -1.103410 | 1.819699  | 2.586096  |
| 27 | 1  | 0 | -0.611619 | 3.391479  | 1.940222  |
| 28 | 1  | 0 | -2.368647 | 2.376677  | -2.402639 |
| 29 | 1  | 0 | -3.333196 | 3.346587  | -1.288438 |
| 30 | 1  | 0 | -1.698897 | 3.849966  | -1.699673 |
| 31 | 1  | 0 | -2.184392 | -3.655772 | 0.618793  |
| 32 | 1  | 0 | -2.791164 | -3.670453 | -1.060275 |
| 33 | 6  | 0 | 1.212958  | -1.705985 | 2.952257  |
| 34 | 1  | 0 | 0.551761  | -1.080753 | 3.558511  |
| 35 | 1  | 0 | 0.607978  | -2.468442 | 2.442680  |
| 36 | 1  | 0 | 1.883078  | -2.257661 | 3.626346  |
| 37 | 6  | 0 | 3.389220  | -0.249671 | -2.606193 |
| 38 | 1  | 0 | 2.921347  | -0.349083 | -3.594261 |
| 39 | 1  | 0 | 4.212443  | 0.461290  | -2.706257 |
| 40 | 1  | 0 | 3.800103  | -1.226827 | -2.332916 |
| 41 | 1  | 0 | 4.174787  | 1.433883  | -0.583171 |
| 42 | 1  | 0 | 2.564068  | 2.300684  | 0.981772  |

```

-----
Statistical Thermodynamic Analysis for 8+a2_n_080226.out
Temperature= 298.150 Kelvin Pressure= 1.00000 Atm
-----
SCF Energy= -1070.03581270
Zero-point correction (ZPE)= -1069.68512 0.350687
Internal Energy (U)= -1069.66200 0.373804
Enthalpy (H)= -1069.66106 0.374748
Gibbs Free Energy (G)= -1069.73865 0.297163
Entropy (S)= 0.00026022
-----
Frequencies -- -315.9695 26.8364 35.2505
Frequencies -- 43.7652 47.5763 70.1779

```

```

-----
Analyzing Gaussian Output File: SP_MP2_8+a2_n_080427.out
Using Gaussian 03: IA64L-G03RevD.01 13-Oct-2005
[#Processors=4 Memory=4gb CheckPoint=SP_MP2_8+a2_n_080427.chk]
-----
#p mp2/6-31+g(d) geom=connectivity scf=tight
-----
Pointgroup=C1 Stoichiometry=C14H23AlNO3(1+) C1[X(C14H23AlNO3)]
Charge = 1 Multiplicity = 1
-----
Standard basis: 6-31+G(d) (6D, 7F) #Basis: 411
SCF Energy= -1064.33854444
MP2 Energy= -1066.9192893048 Correl. Energy= -2.580744865
-----
No optimization variables found.

```

# 18+A<sub>2</sub>, *exo* TS

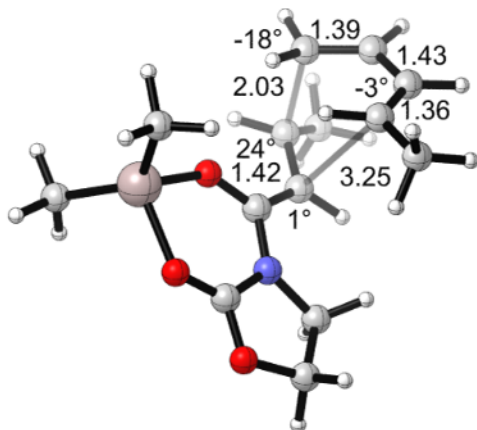

```
-----
Analyzing Gaussian Output File: 8+a2_x_080226.out
Using Gaussian 03: AM64L-G03RevC.02 12-Jun-2004
[#Processors=2 Memory=1800MB CheckPoint=8+a2_x_080226.chk]
-----
# opt=(gdiis,modredundant) b3lyp/6-31g(d) geom=connectivity
Modredundant Input: B 1 6 F
# b3lyp/6-31g* opt=(calcf,ts,noeigentest,nofreeze,gdiis) geom=check
guess=read freq=norman
#N Geom=AllCheck Guess=Read SCRF=Check GenChk RB3LYP/6-31G(d) Freq
-----
Pointgroup=C1 Stoichiometry=C14H23AlNO3(1+) C1[X(C14H23AlNO3)]
Charge = 1 Multiplicity = 1
-----
Standard basis: 6-31G(d) (6D, 7F) #Basis: 335
SCF Energy= -1070.03515580
Predicted Change= -3.295011D-10
-----
Optimization completed. {Found 3 times}
Item Max Val. Criteria Pass? RMS Val. Criteria Pass?
Force 0.000000 || 0.000450 [ YES ] 0.000000 || 0.000300 [ YES ]
Displ 0.000461 || 0.001800 [ YES ] 0.000103 || 0.001200 [ YES ]
-----
Center Atomic Atomic Coordinates (Angstroms)
Number Number Type X Y Z
-----
1 6 0 2.962061 -1.591164 0.052385
2 6 0 3.783567 -0.593408 0.562866
3 6 0 3.360874 0.507931 1.363818
4 6 0 2.100994 0.661365 1.861843
5 6 0 1.247794 0.284678 -1.253065
6 6 0 2.104915 -0.787630 -1.608357
7 1 0 4.096678 1.284182 1.565856
8 1 0 1.380772 -0.144883 1.739033
9 1 0 2.013996 -1.812905 0.533836
10 6 0 1.650917 1.826942 2.676825
-----
```

|    |    |   |           |           |           |
|----|----|---|-----------|-----------|-----------|
| 11 | 1  | 0 | 2.399658  | 2.622587  | 2.718114  |
| 12 | 1  | 0 | 0.710353  | 2.241687  | 2.289604  |
| 13 | 1  | 0 | 1.431864  | 1.502804  | 3.704238  |
| 14 | 1  | 0 | 1.598358  | -1.741326 | -1.745844 |
| 15 | 6  | 0 | 3.234306  | -0.522132 | -2.577738 |
| 16 | 1  | 0 | 3.950026  | -1.347486 | -2.609150 |
| 17 | 1  | 0 | 2.815055  | -0.414396 | -3.586575 |
| 18 | 1  | 0 | 3.771775  | 0.400911  | -2.340356 |
| 19 | 1  | 0 | 1.570943  | 1.301574  | -1.438771 |
| 20 | 6  | 0 | -0.016674 | 0.051072  | -0.707576 |
| 21 | 8  | 0 | -0.413292 | -1.108084 | -0.340563 |
| 22 | 7  | 0 | -0.908855 | 1.141098  | -0.554495 |
| 23 | 13 | 0 | -2.014591 | -1.786659 | 0.402276  |
| 24 | 6  | 0 | -0.673676 | 2.498076  | -1.077727 |
| 25 | 6  | 0 | -2.209250 | 1.017759  | -0.128798 |
| 26 | 8  | 0 | -2.772104 | -0.003946 | 0.286976  |
| 27 | 6  | 0 | -2.923672 | -2.911050 | -0.909114 |
| 28 | 6  | 0 | -1.700567 | -2.153875 | 2.298920  |
| 29 | 6  | 0 | -1.960047 | 3.224626  | -0.635369 |
| 30 | 1  | 0 | -0.554185 | 2.466148  | -2.164847 |
| 31 | 1  | 0 | 0.220388  | 2.938598  | -0.631376 |
| 32 | 8  | 0 | -2.856853 | 2.165007  | -0.204383 |
| 33 | 1  | 0 | -3.955560 | -3.124957 | -0.602013 |
| 34 | 1  | 0 | -2.974094 | -2.456238 | -1.906606 |
| 35 | 1  | 0 | -2.425095 | -3.882367 | -1.023968 |
| 36 | 1  | 0 | -1.189457 | -1.337088 | 2.826232  |
| 37 | 1  | 0 | -2.646070 | -2.326951 | 2.829083  |
| 38 | 1  | 0 | -1.095783 | -3.058821 | 2.443617  |
| 39 | 1  | 0 | -2.456325 | 3.766136  | -1.440088 |
| 40 | 1  | 0 | -1.807097 | 3.887134  | 0.218752  |
| 41 | 1  | 0 | 3.441230  | -2.446624 | -0.416034 |
| 42 | 1  | 0 | 4.822986  | -0.581794 | 0.239402  |

```
-----
Statistical Thermodynamic Analysis for 8+a2_x_080226.out
Temperature= 298.150 Kelvin Pressure= 1.00000 Atm
-----
SCF Energy= -1070.03515580
Zero-point correction (ZPE)= -1069.68434 0.350810
Internal Energy (U)= -1069.66121 0.373945
Enthalpy (H)= -1069.66026 0.374889
Gibbs Free Energy (G)= -1069.73848 0.296675
Entropy (S)= 0.00026233
-----
Frequencies -- -304.7981 20.1768 29.5001
Frequencies -- 39.8743 45.2366 62.1674
-----
```

```
-----
Analyzing Gaussian Output File: SP_MP2_8+a2_x_080427.out
Using Gaussian 03: IA64L-G03RevD.01 13-Oct-2005
[#Processors=4 Memory=4GB CheckPoint=SP_MP2_8+a2_x_080427.chk]
-----
# mp2/6-31+g(d) scf=tight
-----
Pointgroup=C1 Stoichiometry=C14H23AlNO3(1+) C1[X(C14H23AlNO3)]
Charge = 1 Multiplicity = 1
-----
Standard basis: 6-31+G(d) (6D, 7F) #Basis: 411
SCF Energy= -1064.33811981
MP2 Energy= -1066.9165930452 Correl. Energy= -2.578473238
-----
No optimization variables found.
-----
```

# 19+A<sub>2</sub>, endo TS

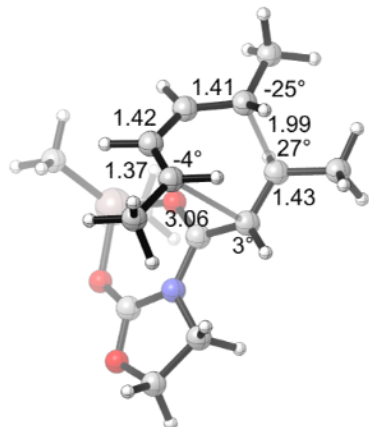

```
-----
Analyzing Gaussian Output File: 6+a_endo_080211.out
Using Gaussian 03: AM64L-G03RevC.02 12-Jun-2004
[#Processors=2 Memory=1800MB CheckPoint=6+a_endo_080211.chk]
-----
# opt=(gdiis,modredundant) b3lyp/6-31g(d) geom=connectivity
Modredundant Input: B 1 6 F
# opt=(gdiis,ts,noeigentest,nofreeze,calcf) b3lyp/6-31g(d) geom=check
guess=read freq=norman
#N Geom=AllCheck Guess=Read SCRF=Check GenChk RB3LYP/6-31G(d) Freq
-----
Pointgroup=C1 Stoichiometry=C15H25AlNO3(1+) C1[X(C15H25AlNO3)]
Charge = 1 Multiplicity = 1
-----
Standard basis: 6-31G(d) (6D, 7F) #Basis: 354
SCF Energy= -1109.34959787
Predicted Change= -2.151210D-09
-----
Optimization completed. {Found 3 times}
Item Max Val. Criteria Pass? RMS Val. Criteria Pass?
Force 0.000001 || 0.000450 [ YES ] 0.000000 || 0.000300 [ YES ]
Displ 0.001512 || 0.001800 [ YES ] 0.000228 || 0.001200 [ YES ]
-----
Center Atomic Atomic Coordinates (Angstroms)
Number Number Type X Y Z
-----
1 6 0 3.287879 0.283898 0.112762
2 6 0 2.403135 0.622284 1.153788
3 6 0 1.637578 -0.271500 1.942485
4 6 0 1.621718 -1.627701 1.780125
5 6 0 0.995059 -0.952192 -1.133149
6 6 0 2.173383 -0.214080 -1.461114
7 1 0 0.973575 0.170871 2.682281
8 1 0 1.989605 0.825173 -1.725862
9 1 0 0.966561 -2.019025 -1.319438
10 1 0 2.319182 -2.087626 1.084082
-----
```

```
11 1 0 3.743997 -0.703267 0.184897
12 6 0 -0.138056 -0.292729 -0.664833
13 8 0 -0.116490 0.950450 -0.357314
14 7 0 -1.358645 -0.999273 -0.519821
15 13 0 -1.437844 2.188152 0.185699
16 6 0 -1.582495 -2.383931 -0.965563
17 6 0 -2.547649 -0.418492 -0.166543
18 8 0 -2.742299 0.759784 0.167523
19 6 0 -1.125181 2.676241 2.056345
20 6 0 -1.844398 3.395951 -1.295075
21 6 0 -3.050419 -2.605789 -0.547951
22 1 0 -0.902529 -3.071554 -0.458167
23 1 0 -1.429681 -2.461359 -2.046445
24 8 0 -3.546626 -1.280792 -0.215259
25 1 0 -1.952163 3.284243 2.445447
26 1 0 -1.029585 1.812320 2.727317
27 1 0 -0.217740 3.283626 2.175925
28 1 0 -1.981675 2.878889 -2.253382
29 1 0 -2.764716 3.962608 -1.102685
30 1 0 -1.048058 4.137291 -1.442644
31 1 0 -3.153818 -3.224992 0.345212
32 1 0 -3.678497 -2.999570 -1.346424
33 6 0 4.222243 1.381432 -0.371852
34 1 0 5.051869 1.502676 0.334232
35 1 0 4.663095 1.163280 -1.346877
36 1 0 3.700907 2.342000 -0.441918
37 6 0 0.788843 -2.562761 2.591453
38 1 0 0.062035 -2.037567 3.217331
39 1 0 0.261607 -3.287503 1.957938
40 1 0 1.437786 -3.161031 3.247647
41 6 0 3.158656 -0.942968 -2.358762
42 1 0 2.739395 -0.997411 -3.371087
43 1 0 4.122329 -0.438291 -2.438610
44 1 0 3.332681 -1.968544 -2.015498
45 1 0 2.27879 1.682182 1.339082
-----
```

```
-----
Statistical Thermodynamic Analysis for 6+a_endo_080211.out
Temperature= 298.150 Kelvin Pressure= 1.00000 Atm
-----
SCF Energy= -1109.34959787
Zero-point correction (ZPE)= -1108.97064 0.378956
Internal Energy (U)= -1108.94611 0.403483
Enthalpy (H)= -1108.94517 0.404427
Gibbs Free Energy (G)= -1109.02554 0.324052
Entropy (S)= 0.00026958
-----
Frequencies -- -336.8374 25.4899 31.2109
Frequencies -- 43.1423 48.1478 71.2578
-----
```

```
-----
Analyzing Gaussian Output File: SP_MP2_6+a2_n_080429.out
Using Gaussian 03: IA64L-G03RevD.01 13-Oct-2005
[#Processors=4 Memory=4gb CheckPoint=SP_MP2_6+a2_n_080429.chk]
-----
#p mp2/6-31+g(d) geom=check guess=read scf=tight
-----
Pointgroup=C1 Stoichiometry=C15H25AlNO3(1+) C1[X(C15H25AlNO3)]
Charge = 1 Multiplicity = 1
-----
Standard basis: 6-31+G(d) (6D, 7F) #Basis: 434
SCF Energy= -1103.36832154
MP2 Energy= -1106.0918341154 Correl. Energy= -2.723512571
-----
No optimization variables found.
-----
```

# 19+A<sub>2</sub>, *exo* TS

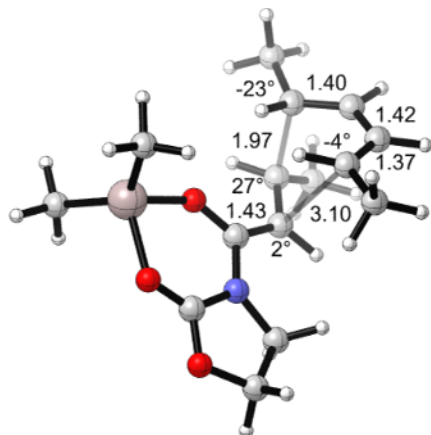

```
-----
Analyzing Gaussian Output File: 6+a_exo_050208.out
Using Gaussian 03: AM64L-G03RevC.02 12-Jun-2004
[#Processors=2 Memory=1800MB CheckPoint=6+a_exo_050208.chk]
-----
```

```
# opt=modredundant b3lyp/6-31g(d) geom=connectivity
Modredundant Input: B 1 6 F
# opt=(ts,calcfc,noeigentest,nofreeze,gdiis) b3lyp/6-31g(d) geom=check
guess=read freq=noraman
#N Geom=AllCheck Guess=Read SCRF=Check GenChk RB3LYP/6-31G(d) Freq
-----
```

```
Pointgroup=C1 Stoichiometry=C15H25AlNO3(1+) C1[X(C15H25AlNO3)]
Charge = 1 Multiplicity = 1
-----
```

```
Standard basis: 6-31G(d) (6D, 7F) #Basis: 354
SCF Energy= -1109.35212796
Predicted Change= -2.379263D-09
-----
```

```
Optimization completed. {Found 3 times}
Item Max Val. Criteria Pass? RMS Val. Criteria Pass?
Force 0.000006 || 0.000450 [ YES ] 0.000001 || 0.000300 [ YES ]
Displ 0.001661 || 0.001800 [ YES ] 0.000249 || 0.001200 [ YES ]
-----
```

| Center Number | Atomic Number | Atomic Type | Coordinates (Angstroms) |           |           |
|---------------|---------------|-------------|-------------------------|-----------|-----------|
|               |               |             | X                       | Y         | Z         |
| 1             | 6             | 0           | -2.973244               | 0.911252  | 0.145595  |
| 2             | 6             | 0           | -3.595301               | -0.237176 | 0.658125  |
| 3             | 6             | 0           | -2.962706               | -1.282122 | 1.378302  |
| 4             | 6             | 0           | -1.677330               | -1.233300 | 1.841297  |
| 5             | 6             | 0           | -0.996875               | -0.665621 | -1.125302 |
| 6             | 6             | 0           | -2.078866               | 0.206126  | -1.461057 |
| 7             | 1             | 0           | -3.538410               | -2.191054 | 1.544262  |
| 8             | 1             | 0           | -1.128772               | -0.296232 | 1.785902  |
| 9             | 1             | 0           | -2.037351               | 1.211426  | 0.614123  |
| 10            | 6             | 0           | -3.829415               | 2.077987  | -0.308413 |

|    |    |   |           |           |           |
|----|----|---|-----------|-----------|-----------|
| 11 | 1  | 0 | -4.096001 | 2.695124  | 0.557590  |
| 12 | 1  | 0 | -3.296028 | 2.723627  | -1.013462 |
| 13 | 1  | 0 | -4.761701 | 1.748255  | -0.777457 |
| 14 | 6  | 0 | -0.999203 | -2.349375 | 2.561879  |
| 15 | 1  | 0 | -1.574142 | -3.278850 | 2.532174  |
| 16 | 1  | 0 | 0.002760  | -2.533897 | 2.152249  |
| 17 | 1  | 0 | -0.842481 | -2.072002 | 3.614336  |
| 18 | 1  | 0 | -1.757540 | 1.222388  | -1.687488 |
| 19 | 6  | 0 | -3.128743 | -0.335270 | -2.410903 |
| 20 | 1  | 0 | -3.999214 | 0.321188  | -2.482924 |
| 21 | 1  | 0 | -2.694528 | -0.408897 | -3.415756 |
| 22 | 1  | 0 | -3.465605 | -1.335466 | -2.121138 |
| 23 | 1  | 0 | -1.100890 | -1.727532 | -1.310149 |
| 24 | 6  | 0 | 0.212866  | -0.168103 | -0.647417 |
| 25 | 8  | 0 | 0.377226  | 1.054029  | -0.298887 |
| 26 | 7  | 0 | 1.324681  | -1.044953 | -0.543322 |
| 27 | 13 | 0 | 1.818343  | 2.040674  | 0.415638  |
| 28 | 6  | 0 | 1.365191  | -2.410523 | -1.093685 |
| 29 | 6  | 0 | 2.585744  | -0.647781 | -0.175209 |
| 30 | 8  | 0 | 2.934987  | 0.465980  | 0.240235  |
| 31 | 6  | 0 | 2.427063  | 3.362123  | -0.886543 |
| 32 | 6  | 0 | 1.493854  | 2.304437  | 2.328781  |
| 33 | 6  | 0 | 2.798161  | -2.846991 | -0.727404 |
| 34 | 1  | 0 | 1.189027  | -2.385136 | -2.173348 |
| 35 | 1  | 0 | 0.610941  | -3.044552 | -0.622998 |
| 36 | 8  | 0 | 3.463628  | -1.624917 | -0.308282 |
| 37 | 1  | 0 | 3.404601  | 3.775532  | -0.606468 |
| 38 | 1  | 0 | 2.530330  | 2.954185  | -1.900079 |
| 39 | 1  | 0 | 1.736586  | 4.213184  | -0.952120 |
| 40 | 1  | 0 | 1.210727  | 1.384807  | 2.858653  |
| 41 | 1  | 0 | 2.389051  | 2.693060  | 2.831344  |
| 42 | 1  | 0 | 0.696733  | 3.038047  | 2.508502  |
| 43 | 1  | 0 | 3.360288  | -3.254564 | -1.567098 |
| 44 | 1  | 0 | 2.833825  | -3.541180 | 0.114517  |
| 45 | 1  | 0 | -4.637326 | -0.400276 | 0.383982  |

```
-----
Statistical Thermodynamic Analysis for 6+a_exo_050208.out
Temperature= 298.150 Kelvin Pressure= 1.00000 Atm
-----
```

```
SCF Energy= -1109.35212796
Zero-point correction (ZPE)= -1108.97314 0.378985
Internal Energy (U)= -1108.94850 0.403622
Enthalpy (H)= -1108.94756 0.404566
Gibbs Free Energy (G)= -1109.02899 0.323137
Entropy (S)= 0.00027311
-----
```

```
Frequencies -- -298.1387 19.6919 31.1023
Frequencies -- 37.6115 42.9941 61.4837
-----
```

```
-----
Analyzing Gaussian Output File: SP_MP2_6+a2_x_080429.out
Using Gaussian 03: IA64L-G03RevD.01 13-Oct-2005
[#Processors=4 Memory=4gb CheckPoint=SP_MP2_6+a2_x_080429.chk]
-----
```

```
#p mp2/6-31+g(d) geom=check guess=read scf=tight
-----
```

```
Pointgroup=C1 Stoichiometry=C15H25AlNO3(1+) C1[X(C15H25AlNO3)]
Charge = 1 Multiplicity = 1
-----
```

```
Standard basis: 6-31+G(d) (6D, 7F) #Basis: 434
SCF Energy= -1103.37295098
MP2 Energy= -1106.092289129 Correl. Energy= -2.719338144
-----
```

```
No optimization variables found.
-----
```



**1d+A<sub>2</sub>, endo TS**

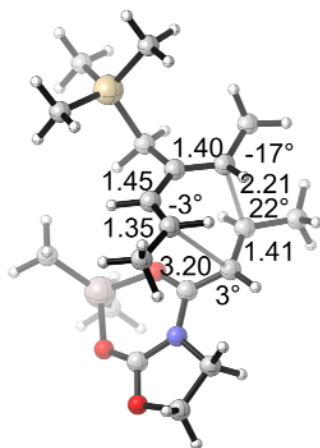

```

-----
Analyzing Gaussian Output File: 1l+a2_n_080303.out
Using Gaussian 03: AM64L-G03RevC.02 12-Jun-2004
[#Processors=2 Memory=1800MB CheckPoint=1l+a2_n_080303.chk]
-----
# opt=(gdiis,modredundant) b3lyp/6-31g(d) geom=connectivity
Modredundant Input: B 1 6 F
# opt=(gdiis,ts,calcfc,nofreeze,noigentest) freq=noraman b3lyp/6-31g(d)
guess=read geom=check
#N Geom=AllCheck Guess=Read SCRF=Check GenChk RB3LYP/6-31G(d) Freq
-----
Pointgroup=C1 Stoichiometry=C19H35AlNO3Si(1+) C1[X(C19H35AlNO3Si)]
Charge = 1 Multiplicity = 1
-----
Standard basis: 6-31G(d) (6D, 7F) #Basis: 453
SCF Energy= -1557.34952477
Predicted Change= -2.510335D-09
-----
Optimization completed. {Found 3 times}
Item Max Val. Criteria Pass? RMS Val. Criteria Pass?
Force 0.000003 || 0.000450 [ YES ] 0.000001 || 0.000300 [ YES ]
Displ 0.001139 || 0.001800 [ YES ] 0.000309 || 0.001200 [ YES ]
-----

```

| Center Number | Atomic Number | Atomic Type | Coordinates (Angstroms) |          |           |
|---------------|---------------|-------------|-------------------------|----------|-----------|
|               |               |             | X                       | Y        | Z         |
| 1             | 6             | 0           | -1.747224               | 2.129877 | -0.411061 |
| 2             | 6             | 0           | -1.720282               | 0.822899 | 0.092771  |
| 3             | 6             | 0           | -0.925138               | 0.465927 | 1.252614  |
| 4             | 6             | 0           | -0.218057               | 1.302218 | 2.048262  |
| 5             | 6             | 0           | 1.244687                | 1.929653 | -0.731308 |

|    |    |   |           |           |           |
|----|----|---|-----------|-----------|-----------|
| 6  | 6  | 0 | 0.133126  | 2.150653  | -1.571145 |
| 7  | 1  | 0 | -0.894392 | -0.596038 | 1.488385  |
| 8  | 1  | 0 | -0.186688 | 1.303923  | -2.171724 |
| 9  | 1  | 0 | 1.761543  | 2.784805  | -0.311559 |
| 10 | 1  | 0 | -0.252977 | 2.376427  | 1.878070  |
| 11 | 1  | 0 | -1.372518 | 2.911444  | 0.244188  |
| 12 | 6  | 0 | 1.746525  | 0.647263  | -0.512468 |
| 13 | 8  | 0 | 1.180663  | -0.414174 | -0.950215 |
| 14 | 7  | 0 | 2.967909  | 0.501634  | 0.196849  |
| 15 | 13 | 0 | 1.668793  | -2.226083 | -1.022023 |
| 16 | 6  | 0 | 3.812853  | 1.614272  | 0.660446  |
| 17 | 6  | 0 | 3.615610  | -0.690519 | 0.382266  |
| 18 | 8  | 0 | 3.239794  | -1.819001 | 0.030508  |
| 19 | 6  | 0 | 0.466173  | -3.283657 | 0.108443  |
| 20 | 6  | 0 | 2.260594  | -2.688797 | -2.826806 |
| 21 | 6  | 0 | 4.934164  | 0.859292  | 1.401692  |
| 22 | 1  | 0 | 3.254642  | 2.276171  | 1.325580  |
| 23 | 1  | 0 | 4.179793  | 2.190326  | -0.194532 |
| 24 | 8  | 0 | 4.765073  | -0.530748 | 1.014101  |
| 25 | 1  | 0 | 0.872977  | -4.290926 | 0.268689  |
| 26 | 1  | 0 | 0.299010  | -2.850544 | 1.103332  |
| 27 | 1  | 0 | -0.518844 | -3.424615 | -0.357096 |
| 28 | 1  | 0 | 2.968345  | -1.965268 | -3.251545 |
| 29 | 1  | 0 | 2.756173  | -3.668234 | -2.843385 |
| 30 | 1  | 0 | 1.415727  | -2.755645 | -3.525001 |
| 31 | 1  | 0 | 4.838016  | 0.907797  | 2.488270  |
| 32 | 1  | 0 | 5.937701  | 1.162603  | 1.104968  |
| 33 | 6  | 0 | -2.809836 | 2.581332  | -1.391341 |
| 34 | 1  | 0 | -3.810507 | 2.382139  | -0.991739 |
| 35 | 1  | 0 | -2.746582 | 3.656023  | -1.572948 |
| 36 | 1  | 0 | -2.743900 | 2.070007  | -2.359144 |
| 37 | 6  | 0 | 0.566048  | 0.857461  | 3.243260  |
| 38 | 1  | 0 | 0.576083  | -0.231493 | 3.347378  |
| 39 | 1  | 0 | 1.604312  | 1.213988  | 3.198022  |
| 40 | 1  | 0 | 0.141764  | 1.286663  | 4.161100  |
| 41 | 6  | 0 | 0.009139  | 3.508588  | -2.219615 |
| 42 | 1  | 0 | 0.823301  | 3.609737  | -2.950364 |
| 43 | 1  | 0 | -0.924489 | 3.637238  | -2.765993 |
| 44 | 1  | 0 | 0.116264  | 4.324622  | -1.496957 |
| 45 | 14 | 0 | -4.106864 | -0.858428 | 0.387585  |
| 46 | 6  | 0 | -4.924971 | -2.090913 | -0.783527 |
| 47 | 1  | 0 | -5.834671 | -2.503065 | -0.330666 |
| 48 | 1  | 0 | -5.214295 | -1.621776 | -1.731142 |
| 49 | 1  | 0 | -4.263525 | -2.933930 | -1.015080 |
| 50 | 6  | 0 | -5.249464 | 0.604285  | 0.737323  |
| 51 | 1  | 0 | -4.754766 | 1.386942  | 1.324442  |
| 52 | 1  | 0 | -5.635713 | 1.058923  | -0.182008 |
| 53 | 1  | 0 | -6.116326 | 0.264617  | 1.317275  |
| 54 | 6  | 0 | -3.617953 | -1.700166 | 2.006298  |
| 55 | 1  | 0 | -4.506607 | -2.134163 | 2.480606  |
| 56 | 1  | 0 | -2.904512 | -2.517035 | 1.844705  |
| 57 | 1  | 0 | -3.177418 | -1.000255 | 2.725081  |
| 58 | 6  | 0 | -2.487355 | -0.276447 | -0.546429 |
| 59 | 1  | 0 | -1.878942 | -1.188685 | -0.595275 |
| 60 | 1  | 0 | -2.797618 | -0.025011 | -1.564957 |

```

-----
Statistical Thermodynamic Analysis for 1l+a2_n_080303.out
Temperature= 298.150 Kelvin Pressure= 1.00000 Atm
-----
SCF Energy= -1557.34952477
Zero-point correction (ZPE)= 0.509294
Internal Energy (U)= -1556.80661 0.542910
Enthalpy (H)= -1556.80567 0.543855
Gibbs Free Energy (G)= -1556.90640 0.443119
Entropy (S)= 0.00033787
-----
Frequencies -- -259.8220 19.9396 25.2098
-----

```

Frequencies -- 30.4932 34.0021 41.4079

```

-----
Analyzing Gaussian Output File: SP_MP2_11+a2_n_080501.out
Using Gaussian 03: IA64L-G03RevD.01 13-Oct-2005
[#Processors=4 Memory=4gb CheckPoint=SP_MP2_11+a2_n_080501.chk]
-----
#p mp2/6-31+g(d) scf=(direct,tight) guess=read geom=check
-----
Pointgroup=C1 Stoichiometry=C19H35AlNO3Si(1+) C1[X(C19H35AlNO3Si)]
Charge = 1 Multiplicity = 1
-----
Standard basis: 6-31+G(d) (6D, 7F) #Basis: 553
SCF Energy= -1549.63445469
MP2 Energy= -1552.9843096348 Correl. Energy= -3.349854948
-----
No optimization variables found.

```

## 1d+A<sub>2</sub>, exo TS

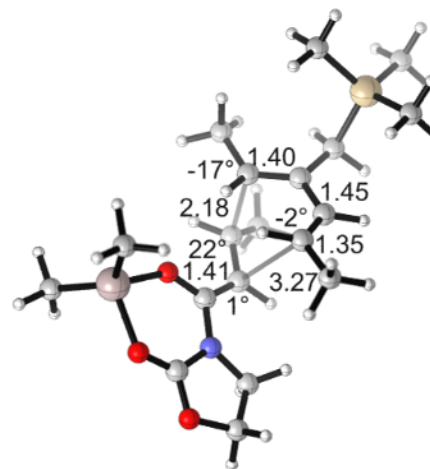

```

-----
Analyzing Gaussian Output File: 11+a2_x_080303.out
Using Gaussian 03: AM64L-G03RevC.02 12-Jun-2004
[#Processors=2 Memory=1800MB CheckPoint=11+a2_x_080303.chk]
-----
# opt=(gdiis,modredundant) b3lyp/6-31g(d) geom=connectivity
Modredundant Input: B 1 6 F
# opt=(gdiis,ts,calcfc,noeigentest,nofreeze) b3lyp/6-31g(d) guess=read
geom=check freq=noraman
#N Geom=AllCheck Guess=Read SCRF=Check GenChk RB3LYP/6-31G(d) Freq
-----
Pointgroup=C1 Stoichiometry=C19H35AlNO3Si(1+) C1[X(C19H35AlNO3Si)]
Charge = 1 Multiplicity = 1
-----
Standard basis: 6-31G(d) (6D, 7F) #Basis: 453
SCF Energy= -1557.35282565
Predicted Change= -9.419317D-10
-----
Optimization completed. {Found 3 times}
Item Max Val. Criteria Pass? RMS Val. Criteria Pass?
Force 0.000002 || 0.000450 [ YES ] 0.000000 || 0.000300 [ YES ]
Displ 0.001306 || 0.001800 [ YES ] 0.000171 || 0.001200 [ YES ]
-----
Center Atomic Atomic Coordinates (Angstroms)
Number Number Type X Y Z
-----
1 6 0 1.441324 1.069388 0.400411
2 6 0 2.193728 -0.098879 0.243748
3 6 0 1.660732 -1.242186 -0.480786
4 6 0 0.575037 -1.259746 -1.287782
5 6 0 -0.822138 -0.478332 1.564302

```

|    |    |   |           |           |           |
|----|----|---|-----------|-----------|-----------|
| 6  | 6  | 0 | 0.118559  | 0.469316  | 2.020131  |
| 7  | 1  | 0 | 2.212442  | -2.174173 | -0.360053 |
| 8  | 1  | 0 | 0.038850  | -0.335910 | -1.496188 |
| 9  | 1  | 0 | 0.575130  | 1.181072  | -0.245868 |
| 10 | 6  | 0 | 2.009303  | 2.384794  | 0.877193  |
| 11 | 1  | 0 | 2.569441  | 2.870630  | 0.068846  |
| 12 | 1  | 0 | 1.209135  | 3.073125  | 1.168181  |
| 13 | 1  | 0 | 2.691959  | 2.283376  | 1.726060  |
| 14 | 6  | 0 | 0.087873  | -2.471407 | -2.018797 |
| 15 | 1  | 0 | 0.643277  | -3.372932 | -1.743914 |
| 16 | 1  | 0 | -0.980683 | -2.644959 | -1.830564 |
| 17 | 1  | 0 | 0.180522  | -2.327049 | -3.103782 |
| 18 | 14 | 0 | 5.046746  | -0.059588 | -0.399445 |
| 19 | 6  | 0 | 6.588130  | -0.213828 | 0.677308  |
| 20 | 1  | 0 | 7.493172  | -0.116888 | 0.065730  |
| 21 | 1  | 0 | 6.627791  | 0.566438  | 1.446317  |
| 22 | 1  | 0 | 6.637053  | -1.185561 | 1.182426  |
| 23 | 6  | 0 | 4.967493  | 1.631151  | -1.234989 |
| 24 | 1  | 0 | 4.044267  | 1.762811  | -1.811448 |
| 25 | 1  | 0 | 5.039543  | 2.452108  | -0.512663 |
| 26 | 1  | 0 | 5.804925  | 1.740927  | -1.934670 |
| 27 | 6  | 0 | 4.992849  | -1.433781 | -1.694059 |
| 28 | 1  | 0 | 5.865080  | -1.354118 | -2.354260 |
| 29 | 1  | 0 | 5.022748  | -2.430702 | -1.238256 |
| 30 | 1  | 0 | 4.099947  | -1.376241 | -2.326631 |
| 31 | 1  | 0 | -0.204304 | 1.505638  | 1.970923  |
| 32 | 6  | 0 | 1.006071  | 0.118371  | 3.183777  |
| 33 | 1  | 0 | 1.840639  | 0.813987  | 3.296321  |
| 34 | 1  | 0 | 0.414010  | 0.177521  | 4.107533  |
| 35 | 1  | 0 | 1.401520  | -0.899331 | 3.109079  |
| 36 | 1  | 0 | -0.710950 | -1.514888 | 1.857442  |
| 37 | 6  | 0 | -1.900530 | -0.101044 | 0.766111  |
| 38 | 8  | 0 | -2.041582 | 1.077573  | 0.284728  |
| 39 | 7  | 0 | -2.903303 | -1.061030 | 0.470861  |
| 40 | 13 | 0 | -3.364484 | 1.933964  | -0.744637 |
| 41 | 6  | 0 | -2.969518 | -2.411289 | 1.054127  |
| 42 | 6  | 0 | -4.062250 | -0.782673 | -0.207140 |
| 43 | 8  | 0 | -4.385044 | 0.285691  | -0.745850 |
| 44 | 6  | 0 | -4.326545 | 3.232261  | 0.353882  |
| 45 | 6  | 0 | -2.678461 | 2.190739  | -2.560576 |
| 46 | 6  | 0 | -4.230782 | -2.977940 | 0.372250  |
| 47 | 1  | 0 | -3.064902 | -2.346573 | 2.142334  |
| 48 | 1  | 0 | -2.075124 | -2.986490 | 0.806025  |
| 49 | 8  | 0 | -4.870654 | -1.827244 | -0.241974 |
| 50 | 1  | 0 | -5.235989 | 3.584440  | -0.150006 |
| 51 | 1  | 0 | -4.635346 | 2.830602  | 1.327480  |
| 52 | 1  | 0 | -3.716756 | 4.123141  | 0.553927  |
| 53 | 1  | 0 | -2.203067 | 1.294550  | -2.981322 |
| 54 | 1  | 0 | -3.483200 | 2.474525  | -3.251199 |
| 55 | 1  | 0 | -1.935879 | 2.998617  | -2.603317 |
| 56 | 1  | 0 | -4.945125 | -3.418003 | 1.067408  |
| 57 | 1  | 0 | -4.004167 | -3.688005 | -0.425684 |
| 58 | 6  | 0 | 3.543784  | -0.270793 | 0.835916  |
| 59 | 1  | 0 | 3.666081  | -1.287453 | 1.233581  |
| 60 | 1  | 0 | 3.735227  | 0.432793  | 1.651298  |

Frequencies -- 23.3930 30.0799 39.6320

```

-----
Analyzing Gaussian Output File: SP_MP2_11+a2_x_080501.out
Using Gaussian 03: IA64L-G03RevD.01 13-Oct-2005
[#Processors=4 Memory=4gb CheckPoint=SP_MP2_11+a2_x_080501.chk]
-----
#p mp2/6-31+g(d) scf=(direct,tight) guess=read geom=check
-----
Pointgroup=C1 Stoichiometry=C19H35AlNO3Si(1+) C1[X(C19H35AlNO3Si)]
Charge = 1 Multiplicity = 1
-----
Standard basis: 6-31+G(d) (6D, 7F) #Basis: 553
SCF Energy= -1549.63903947
MP2 Energy= -1552.9831835728 Correl. Energy= -3.344144107
-----
No optimization variables found.

```

```

-----
Statistical Thermodynamic Analysis for 11+a2_x_080303.out
Temperature= 298.150 Kelvin Pressure= 1.00000 Atm
-----
SCF Energy= -1557.35282565
Zero-point correction (ZPE)= -1556.84369 0.509130
Internal Energy (U)= -1556.80983 0.542990
Enthalpy (H)= -1556.80889 0.543934
Gibbs Free Energy (G)= -1556.91133 0.441494
Entropy (S)= 0.00034359
-----
Frequencies -- -236.7640 16.4313 20.8758

```

**1e+A<sub>2</sub>, endo TS**

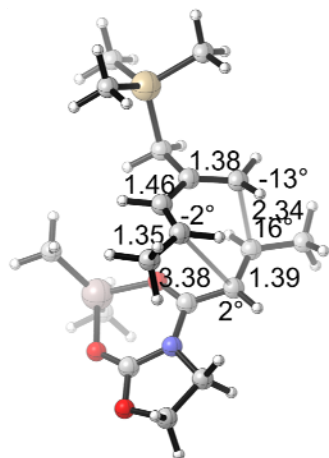

```
-----
Analyzing Gaussian Output File: 12+a2_n_080418.out
Using Gaussian 03: AM64L-G03RevC.02 12-Jun-2004
[#Processors=2 Memory=1800MB CheckPoint=12+a2_n_080418.chk]
-----
# opt=(gdiis,modredundant) b3lyp/6-31g(d) geom=connectivity
Modredundant Input: B 1 6 F
# b3lyp/6-31g* opt=(calcf,ts,noeigentest,nofreeze,gdiis) geom=check
guess=read freq=noraman
#N Geom=AllCheck Guess=Read SCRF=Check GenChk RB3LYP/6-31G(d) Freq
-----
Pointgroup=C1 Stoichiometry=C18H33AlNO3Si(1+) C1[X(C18H33AlNO3Si)]
Charge = 1 Multiplicity = 1
-----
Standard basis: 6-31G(d) (6D, 7F) #Basis: 434
SCF Energy= -1518.03820981
Predicted Change= -4.955717D-09
-----
```

```
-----
Optimization completed. {Found 3 times}
Item Max Val. Criteria Pass? RMS Val. Criteria Pass?
Force 0.000026 || 0.000450 [ YES ] 0.000003 || 0.000300 [ YES ]
Displ 0.001542 || 0.001800 [ YES ] 0.000267 || 0.001200 [ YES ]
-----
```

| Center Number | Atomic Number | Atomic Type | Coordinates (Angstroms) |           |           |
|---------------|---------------|-------------|-------------------------|-----------|-----------|
|               |               |             | X                       | Y         | Z         |
| 1             | 6             | 0           | 1.802595                | -2.000515 | -0.817846 |
| 2             | 6             | 0           | 1.819026                | -0.858300 | -0.046128 |
| 3             | 6             | 0           | 1.083653                | -0.758440 | 1.209932  |
| 4             | 6             | 0           | 0.322439                | -1.718472 | 1.779407  |
| 5             | 6             | 0           | -1.243015               | -1.756254 | -1.215634 |
| 6             | 6             | 0           | -0.153611               | -1.786585 | -2.082335 |
| 7             | 1             | 0           | 1.148415                | 0.203748  | 1.715783  |

|    |    |   |           |           |           |
|----|----|---|-----------|-----------|-----------|
| 8  | 1  | 0 | 0.217373  | -0.831940 | -2.440878 |
| 9  | 1  | 0 | -1.754063 | -2.680467 | -0.972436 |
| 10 | 1  | 0 | 0.255131  | -2.700522 | 1.313973  |
| 11 | 1  | 0 | 1.458209  | -2.949348 | -0.421912 |
| 12 | 6  | 0 | -1.723404 | -0.540455 | -0.697071 |
| 13 | 8  | 0 | -1.155463 | 0.579440  | -0.906477 |
| 14 | 7  | 0 | -2.919091 | -0.552399 | 0.057517  |
| 15 | 13 | 0 | -1.619834 | 2.380207  | -0.573554 |
| 16 | 6  | 0 | -3.751881 | -1.740359 | 0.312501  |
| 17 | 6  | 0 | -3.559876 | 0.577804  | 0.503599  |
| 18 | 8  | 0 | -3.191749 | 1.753141  | 0.373416  |
| 19 | 6  | 0 | -0.408906 | 3.139074  | 0.763606  |
| 20 | 6  | 0 | -2.215343 | 3.209581  | -2.239132 |
| 21 | 6  | 0 | -4.046388 | -1.155995 | 1.227918  |
| 22 | 1  | 0 | -3.173278 | -2.520786 | 0.810463  |
| 23 | 1  | 0 | -4.150134 | -2.130989 | -0.628726 |
| 24 | 8  | 0 | -4.686936 | 0.285382  | 1.124181  |
| 25 | 1  | 0 | -0.808275 | 4.081901  | 1.159871  |
| 26 | 1  | 0 | -0.240246 | 2.479705  | 1.624755  |
| 27 | 1  | 0 | 0.574587  | 3.378135  | 0.337490  |
| 28 | 1  | 0 | -2.920345 | 2.588669  | -2.806702 |
| 29 | 1  | 0 | -2.714717 | 4.168568  | -2.049383 |
| 30 | 1  | 0 | -1.370624 | 3.425194  | -2.906525 |
| 31 | 1  | 0 | -4.714436 | -1.421991 | 2.278560  |
| 32 | 1  | 0 | -5.859795 | -1.396506 | 0.908479  |
| 33 | 6  | 0 | -0.404169 | -1.558006 | 3.078940  |
| 34 | 1  | 0 | -0.303897 | -0.546567 | 3.483742  |
| 35 | 1  | 0 | -1.474545 | -1.784517 | 2.973380  |
| 36 | 1  | 0 | -0.018824 | -2.265745 | 3.825213  |
| 37 | 6  | 0 | 0.099338  | -2.987528 | -2.950307 |
| 38 | 1  | 0 | -0.579887 | -2.934882 | -3.813620 |
| 39 | 1  | 0 | 1.116801  | -3.014637 | -3.344883 |
| 40 | 1  | 0 | -0.105577 | -3.927444 | -2.428448 |
| 41 | 14 | 0 | 4.382709  | 0.467724  | 0.268975  |
| 42 | 6  | 0 | 5.118445  | 2.058750  | -0.431115 |
| 43 | 1  | 0 | 6.142992  | 2.201765  | -0.067291 |
| 44 | 1  | 0 | 5.159839  | 2.040053  | -1.526509 |
| 45 | 1  | 0 | 4.539065  | 2.940374  | -0.132687 |
| 46 | 6  | 0 | 5.371924  | -1.039418 | -0.291191 |
| 47 | 1  | 0 | 4.936351  | -1.977604 | 0.071270  |
| 48 | 1  | 0 | 5.438749  | -1.098934 | -1.384229 |
| 49 | 1  | 0 | 6.397308  | -0.985386 | 0.093710  |
| 50 | 6  | 0 | 4.288532  | 0.546000  | 2.154077  |
| 51 | 1  | 0 | 5.295879  | 0.644950  | 2.576234  |
| 52 | 1  | 0 | 3.706989  | 1.409483  | 2.498755  |
| 53 | 1  | 0 | 3.842340  | -0.357113 | 2.586003  |
| 54 | 6  | 0 | 2.587327  | 0.342355  | -0.478946 |
| 55 | 1  | 0 | 2.068356  | 1.267896  | -0.201339 |
| 56 | 1  | 0 | 2.728426  | 0.348828  | -1.566819 |
| 57 | 1  | 0 | 2.448441  | -2.061071 | -1.687967 |

```
-----
Statistical Thermodynamic Analysis for 12+a2_n_080418.out
Temperature= 298.150 Kelvin Pressure= 1.00000 Atm
-----
SCF Energy= -1518.03820981
Zero-point correction (ZPE)= -1517.55810 0.480101
Internal Energy (U)= -1517.52552 0.512689
Enthalpy (H)= -1517.52457 0.513633
Gibbs Free Energy (G)= -1517.62442 0.413789
Entropy (S)= 0.00033488
-----
Frequencies -- -175.3272 16.9412 20.7381
Frequencies -- 22.5467 37.9569 40.8774
-----
```

```
-----
Analyzing Gaussian Output File: MP2_12+a2_n_080904.out
Using Gaussian 03: IA64L-G03RevD.01 13-Oct-2005
-----
```

```

[#Processors=2 Memory=1800MB CheckPoint=MP2_12+a2_n_080904.chk]
=====
#p mp2/6-31+g(d) scf=tight
-----
Pointgroup=C1 Stoichiometry=C18H33AlNO3Si(1+) C1[X(C18H33AlNO3Si)]
Charge = 1 Multiplicity = 1
-----
Standard basis: 6-31+G(d) (6D, 7F) #Basis: 530
SCF Energy= -1510.61065661
MP2 Energy= -1513.8106356191 Correl. Energy= -3.199979011
=====
No optimization variables found.

```

## 1e+A<sub>2</sub>, *exo* TS

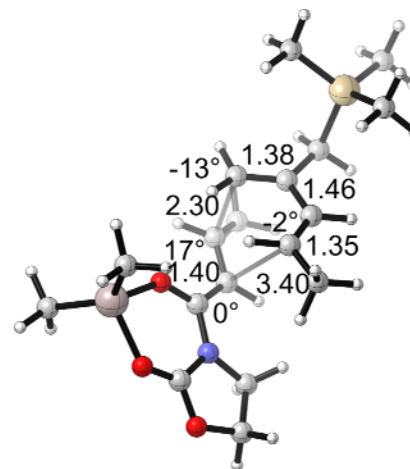

```

-----
Analyzing Gaussian Output File: 12+a2_x_080305.out
Using Gaussian 03: AM64L-G03RevC.02 12-Jun-2004
[#Processors=2 Memory=1800MB CheckPoint=12+a2_x_080305.chk]
=====
# opt=(gdiis,modredundant) b3lyp/6-31g(d) geom=connectivity
Modredundant Input: B 1 6 F
# opt=(gdiis,ts,calcf, noeigentest,nofreeze) freq=noraman b3lyp/6-31g(d)
geom=check guess=read
#N Geom=AllCheck Guess=Read SCRF=Check GenChk RB3LYP/6-31G(d) Freq
-----
Pointgroup=C1 Stoichiometry=C18H33AlNO3Si(1+) C1[X(C18H33AlNO3Si)]
Charge = 1 Multiplicity = 1
-----
Standard basis: 6-31G(d) (6D, 7F) #Basis: 434
SCF Energy= -1518.03819023
Predicted Change= -9.160034D-10
=====
Optimization completed. {Found 3 times}
Item Max Val. Criteria Pass? RMS Val. Criteria Pass?
Force 0.000003 || 0.000450 [ YES ] 0.000000 || 0.000300 [ YES ]
Displ 0.001034 || 0.001800 [ YES ] 0.000233 || 0.001200 [ YES ]
-----
Center Atomic Atomic Coordinates (Angstroms)
Number Number Type X Y Z
-----
1 6 0 1.590815 1.104319 0.545294
2 6 0 2.274639 -0.048933 0.217241
3 6 0 1.727411 -1.037145 -0.706051
4 6 0 0.605620 -0.912808 -1.448697
5 6 0 -0.749515 -0.512316 1.643761

```

|    |    |   |           |           |           |
|----|----|---|-----------|-----------|-----------|
| 6  | 6  | 0 | 0.142219  | 0.414043  | 2.188668  |
| 7  | 1  | 0 | 2.293981  | -1.963547 | -0.794839 |
| 8  | 1  | 0 | 0.042993  | 0.019001  | -1.423875 |
| 9  | 1  | 0 | 0.751488  | 1.452409  | -0.046276 |
| 10 | 6  | 0 | 0.099695  | -1.955914 | -2.395584 |
| 11 | 1  | 0 | 0.688033  | -2.877029 | -2.348397 |
| 12 | 1  | 0 | -0.952613 | -2.201411 | -2.194832 |
| 13 | 1  | 0 | 0.128271  | -1.582531 | -3.428178 |
| 14 | 14 | 0 | 5.125325  | -0.152969 | -0.293544 |
| 15 | 6  | 0 | 6.656668  | -0.350203 | 0.687356  |
| 16 | 1  | 0 | 7.567809  | -0.097356 | 0.132027  |
| 17 | 1  | 0 | 6.709036  | 0.164778  | 1.653702  |
| 18 | 1  | 0 | 6.679944  | -1.429121 | 0.880467  |
| 19 | 6  | 0 | 5.072557  | 2.019310  | -0.567706 |
| 20 | 1  | 0 | 4.162902  | 2.333458  | -1.092289 |
| 21 | 1  | 0 | 5.124545  | 2.572483  | 0.377745  |
| 22 | 1  | 0 | 5.927102  | 2.337676  | -1.176787 |
| 23 | 6  | 0 | 5.048354  | -0.770453 | -1.939098 |
| 24 | 1  | 0 | 5.923695  | -0.519140 | -2.550310 |
| 25 | 1  | 0 | 5.053161  | -1.858289 | -1.800421 |
| 26 | 1  | 0 | 4.158283  | -0.507075 | -2.521565 |
| 27 | 1  | 0 | -0.157181 | 1.456963  | 2.146066  |
| 28 | 6  | 0 | 1.068604  | 0.026925  | 3.303887  |
| 29 | 1  | 0 | 1.883018  | 0.743539  | 3.431696  |
| 30 | 1  | 0 | 0.497934  | 0.017279  | 4.243836  |
| 31 | 1  | 0 | 1.492399  | -0.971918 | 3.163611  |
| 32 | 1  | 0 | -0.607665 | -1.567094 | 1.845314  |
| 33 | 6  | 0 | -1.825024 | -0.101428 | 0.843433  |
| 34 | 8  | 0 | -1.994224 | 1.105128  | 0.464731  |
| 35 | 7  | 0 | -2.778320 | -1.066081 | 0.440689  |
| 36 | 13 | 0 | -3.318382 | 2.008549  | -0.537674 |
| 37 | 6  | 0 | -2.791582 | -2.473165 | 0.876002  |
| 38 | 6  | 0 | -3.926005 | -0.772846 | -0.255020 |
| 39 | 8  | 0 | -4.274248 | 0.327486  | -0.703817 |
| 40 | 6  | 0 | -4.356456 | 3.171096  | 0.638444  |
| 41 | 6  | 0 | -2.579274 | 2.431106  | -2.299622 |
| 42 | 6  | 0 | -4.022061 | -3.018198 | 0.121575  |
| 43 | 1  | 0 | -2.899757 | -2.530469 | 1.963052  |
| 44 | 1  | 0 | -1.870023 | -2.977970 | 0.578640  |
| 45 | 8  | 0 | -4.683488 | -1.841107 | -0.416744 |
| 46 | 1  | 0 | -5.275092 | 3.515475  | 0.145953  |
| 47 | 1  | 0 | -4.658317 | 2.683009  | 1.573873  |
| 48 | 1  | 0 | -3.794003 | 4.072729  | 0.913975  |
| 49 | 1  | 0 | -2.067654 | 1.585003  | -2.777443 |
| 50 | 1  | 0 | -3.367501 | 2.754789  | -2.991675 |
| 51 | 1  | 0 | -1.856336 | 3.255918  | -2.247090 |
| 52 | 1  | 0 | -4.738068 | -3.529894 | 0.764058  |
| 53 | 1  | 0 | -3.759421 | -3.657045 | -0.723687 |
| 54 | 6  | 0 | 3.601076  | -0.352610 | 0.818115  |
| 55 | 1  | 0 | 3.714414  | -1.426283 | 1.017762  |
| 56 | 1  | 0 | 3.745783  | 0.185136  | 1.762292  |
| 57 | 1  | 0 | 2.080718  | 1.859670  | 1.152793  |

```

-----
Statistical Thermodynamic Analysis for 12+a2_x_080305.out
Temperature= 298.150 Kelvin Pressure= 1.00000 Atm
-----
SCF Energy= -1518.03819023
Zero-point correction (ZPE)= -1517.55811 0.480073
Internal Energy (U)= -1517.52540 0.512788
Enthalpy (H)= -1517.52445 0.513733
Gibbs Free Energy (G)= -1517.62554 0.412643
Entropy (S)= 0.00033906
-----
Frequencies -- -185.6009 15.6794 18.0714
Frequencies -- 23.8168 26.0880 37.4570
-----

```

```

Analyzing Gaussian Output File: MP2_12+a2_x_080729.out
Using Gaussian 03: AM64L-G03RevC.02 12-Jun-2004
[#Processors=2 Memory=2gB CheckPoint=MP2_12+a2_x_080729.chk]
=====
# mp2/6-31+g(d) scf=(direct,tight)
-----
Pointgroup=C1 Stoichiometry=C18H33AlNO3Si(1+) C1[X(C18H33AlNO3Si)]
Charge = 1 Multiplicity = 1
-----
Standard basis: 6-31+G(d) (6D, 7F) #Basis: 530
SCF Energy= -1510.60983890
MP2 Energy= -1513.8079453513 Correl. Energy= -3.198106453
=====
No optimization variables found.

```

20+A<sub>2</sub>, *endo* TS

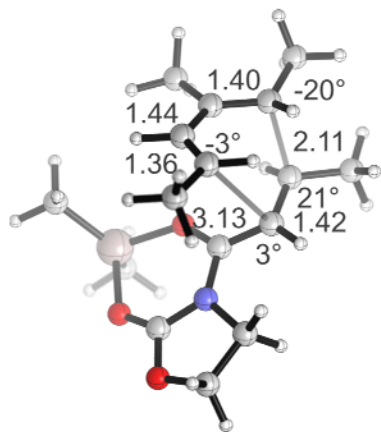

```
-----
Analyzing Gaussian Output File: 9+a2_n_080731.out
Using Gaussian 03: AM64L-G03RevC.02 12-Jun-2004
[#Processors=2 Memory=2gB CheckPoint=9+a2_n_080731.chk]
=====
#p opt=(modredundant,gdiis) b3lyp/6-31g(d)
Modredundant Input: B 1 6 F
#p opt=(calcfc,ts,noeigentest,nofreeze,gdiis) b3lyp/6-31g(d) freq=noraman
geom=check guess=read
#P Geom=AllCheck Guess=Read SCRF=Check GenChk RB3LYP/6-31G(d) Freq
-----
Pointgroup=C1 Stoichiometry=C16H27AlNO3(1+) C1[X(C16H27AlNO3)]
Charge = 1 Multiplicity = 1
-----
Standard basis: 6-31G(d) (6D, 7F) #Basis: 373
SCF Energy=-1148.67056846
Predicted Change= -2.877597D-09
=====
```

```
Optimization completed on the basis of negligible forces. {Found 3 times}
Item Max Val. Criteria Pass? RMS Val. Criteria Pass?
Force 0.000003 || 0.000450 [ YES ] 0.000001 || 0.000300 [ YES ]
Displ 0.002511 || 0.001800 [ NO ] 0.000371 || 0.001200 [ YES ]
-----
```

| Center Number | Atomic Number | Atomic Type | Coordinates (Angstroms) |           |           |
|---------------|---------------|-------------|-------------------------|-----------|-----------|
|               |               |             | X                       | Y         | Z         |
| 1             | 6             | 0           | 3.329145                | -0.371377 | 0.038321  |
| 2             | 6             | 0           | 2.611185                | 0.465474  | 0.907250  |
| 3             | 6             | 0           | 1.633518                | -0.030004 | 1.834185  |
| 4             | 6             | 0           | 1.294659                | -1.332140 | 2.030545  |
| 5             | 6             | 0           | 0.736871                | -1.250056 | -1.045496 |

|    |    |   |           |           |           |
|----|----|---|-----------|-----------|-----------|
| 6  | 6  | 0 | 1.940433  | -0.676628 | -1.525523 |
| 7  | 1  | 0 | 1.096336  | 0.722377  | 2.408442  |
| 8  | 1  | 0 | 1.886381  | 0.381548  | -1.769149 |
| 9  | 1  | 0 | 0.616699  | -2.326342 | -1.085486 |
| 10 | 1  | 0 | 1.842475  | -2.119726 | 1.518135  |
| 11 | 1  | 0 | 3.347113  | -1.428110 | 0.292450  |
| 12 | 6  | 0 | -0.331042 | -0.450660 | -0.638054 |
| 13 | 8  | 0 | -0.247649 | 0.821998  | -0.530912 |
| 14 | 7  | 0 | -1.582928 | -1.062073 | -0.365683 |
| 15 | 13 | 0 | -1.492608 | 2.195412  | -0.189703 |
| 16 | 6  | 0 | -1.888913 | -2.485826 | -0.582829 |
| 17 | 6  | 0 | -2.734243 | -0.371246 | -0.091072 |
| 18 | 8  | 0 | -2.865138 | 0.853475  | 0.049721  |
| 19 | 6  | 0 | -1.150475 | 2.982909  | 1.570932  |
| 20 | 6  | 0 | -1.875013 | 3.158451  | -1.846683 |
| 21 | 6  | 0 | -3.348925 | -2.562365 | -0.094077 |
| 22 | 1  | 0 | -1.225476 | -3.122850 | 0.005594  |
| 23 | 1  | 0 | -1.780352 | -2.736782 | -1.642559 |
| 24 | 8  | 0 | -3.774626 | -1.177550 | 0.018005  |
| 25 | 1  | 0 | -2.000195 | 3.601949  | 1.887909  |
| 26 | 1  | 0 | -0.990935 | 2.241125  | 2.364574  |
| 27 | 1  | 0 | -0.276273 | 3.647554  | 1.563792  |
| 28 | 1  | 0 | -2.038309 | 2.495260  | -2.705877 |
| 29 | 1  | 0 | -2.775191 | 3.778683  | -1.745896 |
| 30 | 1  | 0 | -1.057864 | 3.839320  | -2.119140 |
| 31 | 1  | 0 | -3.446839 | -3.013825 | 0.895287  |
| 32 | 1  | 0 | -4.021028 | -3.056349 | -0.794969 |
| 33 | 6  | 0 | 0.261971  | -1.786384 | 3.011011  |
| 34 | 1  | 0 | -0.272466 | -0.948468 | 3.467455  |
| 35 | 1  | 0 | -0.469744 | -2.457672 | 2.541646  |
| 36 | 1  | 0 | 0.733558  | -2.372208 | 3.812352  |
| 37 | 6  | 0 | 2.765258  | -1.519661 | -2.474954 |
| 38 | 1  | 0 | 2.193610  | -1.644257 | -3.403940 |
| 39 | 1  | 0 | 3.711967  | -1.052439 | -2.744275 |
| 40 | 1  | 0 | 2.962500  | -2.519766 | -2.074189 |
| 41 | 6  | 0 | 2.833405  | 1.951750  | 0.855897  |
| 42 | 1  | 0 | 2.111571  | 2.495803  | 1.467906  |
| 43 | 1  | 0 | 3.842040  | 2.201234  | 1.213004  |
| 44 | 1  | 0 | 2.770152  | 2.329849  | -0.171914 |
| 45 | 6  | 0 | 4.592600  | 0.137410  | -0.629389 |
| 46 | 1  | 0 | 5.109814  | -0.660051 | -1.165247 |
| 47 | 1  | 0 | 4.401958  | 0.956669  | -1.331769 |
| 48 | 1  | 0 | 5.289594  | 0.520362  | 0.126882  |

```
-----
Statistical Thermodynamic Analysis for 9+a2_n_080731.out
Temperature= 298.150 Kelvin Pressure= 1.00000 Atm
-----
SCF Energy=-1148.67056846
Zero-point correction (ZPE)= -1148.26385 0.406716
Internal Energy (U)= -1148.23765 0.432917
Enthalpy (H)= -1148.23670 0.433862
Gibbs Free Energy (G)= -1148.32088 0.349688
Entropy (S)= 0.00028232
-----
Frequencies -- -291.3732 19.5708 29.8911
Frequencies -- 41.6013 47.9738 70.3425
-----
```

```
-----
Analyzing Gaussian Output File: MP2_9+a2_n_080801.out
Using Gaussian 03: AM64L-G03RevC.02 12-Jun-2004
[#Processors=2 Memory=2gB CheckPoint=MP2_9+a2_n_080801.chk]
=====
#p mp2/6-31+g(d) scf=(direct,tight)
-----
Pointgroup=C1 Stoichiometry=C16H27AlNO3(1+) C1[X(C16H27AlNO3)]
Charge = 1 Multiplicity = 1
-----
```

```

Standard basis: 6-31+G(d) (6D, 7F)      #Basis: 457
SCF Energy= -1142.41030825
MP2 Energy= -1145.2699068846   Correl. Energy= -2.859598631
=====
No optimization variables found.

```

## 20+A<sub>2</sub>, *exo* TS

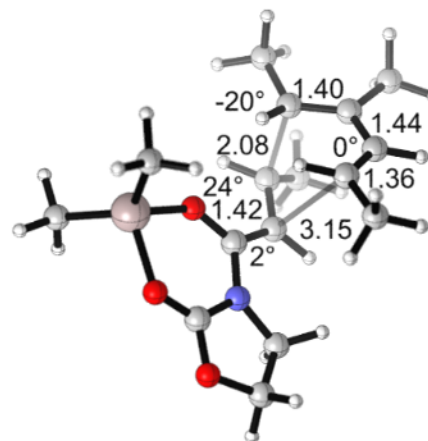

```

-----
Analyzing Gaussian Output File: 9+a2_x_080731.out
Using Gaussian 03: AM64L-G03RevC.02 12-Jun-2004
[#Processors=2 Memory=2gB CheckPoint=9+a2_x_080731.chk]
-----
#p opt=(gdiis,modredundant) b3lyp/6-31g(d)
Modredundant Input: B 1 6 F
#p opt=(gdiis,calcfc,ts,noeigentest,nofreeze) b3lyp/6-31g(d) freq=noraman
guess=read geom=check
#P Geom=AllCheck Guess=Read SCRF=Check GenChk RB3LYP/6-31G(d) Freq
-----
Pointgroup=C1 Stoichiometry=C16H27AlNO3(1+) C1[X(C16H27AlNO3)]
Charge = 1 Multiplicity = 1
-----
Standard basis: 6-31G(d) (6D, 7F)      #Basis: 373
SCF Energy= -1148.67264317
Predicted Change= -1.445285D-09
-----
Optimization completed. {Found 3 times}
Item Max Val. Criteria Pass? RMS Val. Criteria Pass?
Force 0.000002 || 0.000450 [ YES ] 0.000000 || 0.000300 [ YES ]
Displ 0.001520 || 0.001800 [ YES ] 0.000227 || 0.001200 [ YES ]
-----
Center Atomic Atomic Coordinates (Angstroms)
Number Number Type X Y Z
-----
1 6 0 -2.748072 0.987820 0.149277
2 6 0 -3.407377 -0.165040 0.600259
3 6 0 -2.717110 -1.217316 1.295296
4 6 0 -1.451051 -1.159044 1.788363
5 6 0 -0.735765 -0.588745 -1.225545

```



|    |    |   |           |           |           |
|----|----|---|-----------|-----------|-----------|
| 6  | 6  | 0 | -1.774189 | 0.319090  | -1.558856 |
| 7  | 1  | 0 | -3.270127 | -2.145554 | 1.433992  |
| 8  | 1  | 0 | -0.903218 | -0.220068 | 1.760475  |
| 9  | 1  | 0 | -1.789829 | 1.208484  | 0.612853  |
| 10 | 6  | 0 | -3.504687 | 2.224045  | -0.283858 |
| 11 | 1  | 0 | -3.921728 | 2.731359  | 0.595852  |
| 12 | 1  | 0 | -2.841621 | 2.938224  | -0.781633 |
| 13 | 1  | 0 | -4.338990 | 2.006890  | -0.956487 |
| 14 | 6  | 0 | -0.776030 | -2.284528 | 2.502393  |
| 15 | 1  | 0 | -1.353839 | -3.212092 | 2.460746  |
| 16 | 1  | 0 | 0.224885  | -2.470143 | 2.089514  |
| 17 | 1  | 0 | -0.618664 | -2.021893 | 3.557831  |
| 18 | 1  | 0 | -1.448209 | 1.349627  | -1.682317 |
| 19 | 6  | 0 | -2.826974 | -0.134759 | -2.540854 |
| 20 | 1  | 0 | -3.679364 | 0.547367  | -2.584452 |
| 21 | 1  | 0 | -2.385088 | -0.153944 | -3.545920 |
| 22 | 1  | 0 | -3.189401 | -1.143854 | -2.320889 |
| 23 | 1  | 0 | -0.869216 | -1.642168 | -1.438230 |
| 24 | 6  | 0 | 0.469156  | -0.144132 | -0.685423 |
| 25 | 8  | 0 | 0.661716  | 1.062939  | -0.301545 |
| 26 | 7  | 0 | 1.544252  | -1.061767 | -0.556565 |
| 27 | 13 | 0 | 2.124133  | 1.997593  | 0.436418  |
| 28 | 6  | 0 | 1.551623  | -2.425861 | -1.111599 |
| 29 | 6  | 0 | 2.803285  | -0.719071 | -0.132219 |
| 30 | 8  | 0 | 3.181025  | 0.377985  | 0.302525  |
| 31 | 6  | 0 | 2.819031  | 3.275903  | -0.866610 |
| 32 | 6  | 0 | 1.767734  | 2.300210  | 2.337590  |
| 33 | 6  | 0 | 2.944130  | -2.925188 | -0.677686 |
| 34 | 1  | 0 | 1.430199  | -2.389459 | -2.198504 |
| 35 | 1  | 0 | 0.748158  | -3.027009 | -0.681096 |
| 36 | 8  | 0 | 3.644499  | -1.732265 | -0.232045 |
| 37 | 1  | 0 | 3.804756  | 3.654317  | -0.566414 |
| 38 | 1  | 0 | 2.932251  | 2.849932  | -1.871733 |
| 39 | 1  | 0 | 2.165120  | 4.152664  | -0.962085 |
| 40 | 1  | 0 | 1.436323  | 1.399197  | 2.871194  |
| 41 | 1  | 0 | 2.665566  | 2.660490  | 2.856273  |
| 42 | 1  | 0 | 0.995653  | 3.066282  | 2.489005  |
| 43 | 1  | 0 | 3.525684  | -3.362877 | -1.488433 |
| 44 | 1  | 0 | 2.908150  | -3.615209 | 0.167745  |
| 45 | 6  | 0 | -4.872470 | -0.368171 | 0.322762  |
| 46 | 1  | 0 | -5.469255 | 0.317542  | 0.940292  |
| 47 | 1  | 0 | -5.132280 | -0.148220 | -0.718329 |
| 48 | 1  | 0 | -5.194731 | -1.386784 | 0.552042  |

Standard basis: 6-31+G(d) (6D, 7F) #Basis: 457  
 SCF Energy= -1142.41296580  
 MP2 Energy= -1145.2692547061 Correl. Energy= -2.856288908

=====  
 No optimization variables found.

-----  
 Statistical Thermodynamic Analysis for 9+a2\_x\_080731.out  
 Temperature= 298.150 Kelvin Pressure= 1.00000 Atm  
 -----  
 SCF Energy= -1148.67264317  
 Zero-point correction (ZPE)= -1148.26612 0.406522  
 Internal Energy (U)= -1148.23972 0.432916  
 Enthalpy (H)= -1148.23878 0.433861  
 Gibbs Free Energy (G)= -1148.32417 0.348468  
 Entropy (S)= 0.00028641  
 -----  
 Frequencies -- -283.3083 18.8924 28.3043  
 Frequencies -- 32.9051 42.2947 60.3825  
 -----

-----  
 Analyzing Gaussian Output File: MP2\_9+a2\_x\_080801.out  
 Using Gaussian 03: AM64L-G03RevC.02 12-Jun-2004  
 [#Processors=2 Memory=2gB CheckPoint=MP2\_9+a2\_x\_080801.chk]  
 -----  
 #p mp2/6-31+g(d) scf=(direct,tight)  
 -----  
 Pointgroup=C1 Stoichiometry=C16H27AlNO3(1+) C1[X(C16H27AlNO3)]  
 Charge = 1 Multiplicity = 1  
 -----
